# Supplementary material for: Theories for interventions to reduce physical and verbal abuse: A mixed methods review of the health and social care literature to inform future maternity care
Source: PubMed Central journal article supplement (PMC10124898; doi:10.1371/journal.pgph.0001594), 2023-04-24
Supplement: pgph.0001594.s002.pdf [file pgph.0001594.s002.pdf]

| Authors                                                                                           | Year published | Title                                                                                                                                                  | Aim of study                                                                                                                           | Review (yes / no) | Type of review | Country                | Study context - maternity care, elderly population | Type of Mistreatment (physical, verbal, physical restraint) | Explicit theoretical perspective (i.e. constructivist, feminist)? | Study design (grounded theory/phenomenology) | Participant characteristics - staff/professionals (age, profession, ethnicity, etc) | Participant characteristics - patients/service-users (age, ethnicity, etc) |
|---------------------------------------------------------------------------------------------------|----------------|--------------------------------------------------------------------------------------------------------------------------------------------------------|----------------------------------------------------------------------------------------------------------------------------------------|-------------------|----------------|------------------------|----------------------------------------------------|-------------------------------------------------------------|-------------------------------------------------------------------|----------------------------------------------|-------------------------------------------------------------------------------------|----------------------------------------------------------------------------|
| Abuya, T. ,<br>Sripad, P. ,<br>Ritter, J. ,<br>Ndwiga, C. ,<br>Warren, C. E.                      | 2018           | Measuring mistreatment of women throughout the birthing process: implications for quality of care assessments                                          | To examine prevalence of and factors associated with disrespect and abuse in maternity care (baseline measurement for Heshima project) | No                | n/a            | Kenya                  | maternity                                          | physical, verbal                                            | not identified                                                    | cohort study (before and after measurements) | n/a                                                                                 | women giving birth in 13 facilities: 641 at baseline and 728 at endline    |
| Afulani, P. A. ,<br>Kelly, A. M. ,<br>Buback, L. ,<br>Asunka, J. ,<br>Kirumbi, L. ,<br>Lyndon, A. | 2020           | Providers' perceptions of disrespect and abuse during childbirth: a mixed-methods study in                                                             | To examine providers' perspectives on the frequency and drivers of disrespect and abuse during facility-based childbirth in a          | No                | n/a            | Kenya                  | maternity                                          | physical, verbal                                            | not identified                                                    | mixed methods                                | 49 staff, various settings                                                          | n/a                                                                        |
| Alghamdi RS,<br>Stockdale J,<br>boyle B, Perra B                                                  | 2019           | Mistreatment of pregnant women at health facilities in Arab countries: a qualitative systematic review                                                 | To explore the evidence regarding mistreatment during childbirth in Arab countries.                                                    | Yes               | Qualitative    | focused on Arab region | maternity                                          | physical, verbal                                            | not identified                                                    | n/a                                          | Arab women in labour: 8 studies                                                     | n/a                                                                        |
| Amroussia, N. ,<br>Hernandez, A. ,<br>Vives-Cases, C. ,<br>Goicolea, I.                           | 2017           | "Is the doctor God to punish me?!" An intersectional examination of disrespectful and abusive care during childbirth against single mothers in Tunisia | To examine the self-perceptions and childbirth experiences of single mothers at the public healthcare facilities in Tunisia.           | No                | n/a            | Tunisia                | maternity                                          | physical, verbal                                            | not identified                                                    | qualitative                                  | 11 single mothers aged 19-43                                                        | n/a                                                                        |

|                                                           |      |                                                                                                                                              |                                                                                                                                         |    |     |             |           |                 |                |                 |                                                                                                                              |                                   |
|-----------------------------------------------------------|------|----------------------------------------------------------------------------------------------------------------------------------------------|-----------------------------------------------------------------------------------------------------------------------------------------|----|-----|-------------|-----------|-----------------|----------------|-----------------|------------------------------------------------------------------------------------------------------------------------------|-----------------------------------|
| Arnold, R. , van Teijlingen, E. , Ryan, K. , Holloway, I. | 2019 | Villains or victims?<br>An ethnography of Afghan maternity staff and the challenge of high quality respectful care                           | To understand staff notions of care, varying levels of commitment, and the obstacles and dilemmas that affected standards               | No | n/a | Afghanistan | maternity | verbal, neglect | not identified | ethnography     | 22 maternal healthcare providers (doctors, midwives, obstetricians, managers, etc) and 4 group discussions (n not specified) | 16 women from diverse backgrounds |
| Asefa, A. , Bekele, D. , Morgan, A. , Kermode, M.         | 2018 | Service providers' experiences of disrespectful and abusive behavior towards women during facility based childbirth in Addis Ababa, Ethiopia | To enhance understanding of service providers' experiences of D&A during facility based childbirth in health facilities in Addis Ababa. | No | n/a | Ethiopia    | maternity | physical        | not identified | Cross sectional | 57 maternal health professionals                                                                                             | n/a                               |

|                                                                                                                                      |      |                                                                                                                                                   |                                                                                                                                                                                                                          |    |     |          |                |                  |                |                               |                                                   |                                                                 |
|--------------------------------------------------------------------------------------------------------------------------------------|------|---------------------------------------------------------------------------------------------------------------------------------------------------|--------------------------------------------------------------------------------------------------------------------------------------------------------------------------------------------------------------------------|----|-----|----------|----------------|------------------|----------------|-------------------------------|---------------------------------------------------|-----------------------------------------------------------------|
| Bakker, R. ,<br>Sheferaw, E. D. ,<br>Stekelenburg, J. ,<br>Yigzaw, T. , de<br>Kroon, M. L. A.                                        | 2020 | Development and use of a scale to assess gender differences in appraisal of mistreatment during childbirth among Ethiopian midwifery students     | To test hypothesis that male HCPs are less likely to mistreat patients during labour                                                                                                                                     | No | n/a | Ethiopia | maternity care | physical, verbal | not identified | cross sectional / correlation | 390 final-year midwifery students                 | n/a                                                             |
| Balde, M. D. ,<br>Bangoura, A. ,<br>Diallo, B. A. ,<br>Sall, O. , Balde, H. ,<br>Niakate, A. S. ,<br>Vogel, J. P. ,<br>Bohren, M. A. | 2017 | A qualitative study of women's and health providers' attitudes and acceptability of mistreatment during childbirth in health facilities in Guinea | To better understand social norms and acceptability of mistreatment using 4 scenarios (slapping, refusing to help, verbal abuse and forcing to give birth on the floor) from perspectives of women and service providers | No | n/a | Guinea   | maternity care | physical, verbal | not identified | qualitative                   | 13 midwives/nurses<br>5 doctors, 6 administrators | 40 interviews and 8 focus groups with women of reproductive age |

|                                                                     |      |                                                                                                                    |                                                                                                                                                                                                                                 |     |         |                                                                                                   |                |                                      |                |                            |                                                  |                                                                                                                             |
|---------------------------------------------------------------------|------|--------------------------------------------------------------------------------------------------------------------|---------------------------------------------------------------------------------------------------------------------------------------------------------------------------------------------------------------------------------|-----|---------|---------------------------------------------------------------------------------------------------|----------------|--------------------------------------|----------------|----------------------------|--------------------------------------------------|-----------------------------------------------------------------------------------------------------------------------------|
| Betron, M. L. ,<br>McClair, T. L. ,<br>Currie, S. ,<br>Banerjee, J. | 2018 | Expanding the agenda for addressing mistreatment in maternity care: a mapping review and gender analysis           | To examine whether and how gender inequalities and unequal power dynamics in the health system undermine quality of care or obstruct women's capacities to exercise their rights as both users and providers of maternity care. | yes | mapping | Ten were global; 19 reported on 11 countries in Africa, five in Asia, and three in Latin America. | maternity      | verbal, physical                     | not identified | mapping review             | Total 37 papers: participant breakdown not given | Total 37 papers: participant breakdown not given                                                                            |
| Bhattacharya, S. ,<br>Sundari<br>Ravindran, T. K.                   | 2018 | Silent voices: institutional disrespect and abuse during delivery among women of Varanasi district, northern India | To examine the prevalence and nature of abuse of women during delivery                                                                                                                                                          | No  | n/a     | India                                                                                             | Maternity care | physical, verbal, physical restraint | not identified | cross sectional/prevalence | n/a                                              | 410 rural women who gave birth between June 2014 to August 2015 at any health facility of Varanasi district, northern India |

|                                                                                                                                                                                                                                                                                        |      |                                                                                                                                                                                    |                                                                                                                                                               |     |                                    |                                     |                |                                      |                |                         |                                                        |                                                                                       |
|----------------------------------------------------------------------------------------------------------------------------------------------------------------------------------------------------------------------------------------------------------------------------------------|------|------------------------------------------------------------------------------------------------------------------------------------------------------------------------------------|---------------------------------------------------------------------------------------------------------------------------------------------------------------|-----|------------------------------------|-------------------------------------|----------------|--------------------------------------|----------------|-------------------------|--------------------------------------------------------|---------------------------------------------------------------------------------------|
| Bohren, M. A. ,<br>Vogel, J. P. ,<br>Tuncalp, O. ,<br>Fawole, B. ,<br>Titiloye, M. A. ,<br>Olutayo, A. O. ,<br>Ogunlade, M. ,<br>Oyeniran, A. A. ,<br>Osunsan, O. R. ,<br>Metiboba, L. ,<br>Idris, H. A. , Alu,<br>F. E. , Oladapo,<br>O. T. ,<br>Gulmezoglu, A.<br>M. , Hindin, M. J. | 2017 | Mistreatment of women during childbirth in Abuja, Nigeria: a qualitative study on perceptions and experiences of women and healthcare providers                                    | To explore women and providers' experiences and perceptions of mistreatment during childbirth in two health facilities and catchment areas in Abuja, Nigeria. | No  | n/a                                | Nigeria                             | maternity care | physical, verbal, physical restraint | not identified | qualitative exploratory | 17 midwives, 17 doctors and 9 facility administrators. | 75 women of a reproductive age                                                        |
| Bradley, S. ,<br>McCourt, C. ,<br>Rayment, J. ,<br>Parmar, D.                                                                                                                                                                                                                          | 2016 | Disrespectful intrapartum care during facility-based delivery in sub-Saharan Africa: A qualitative systematic review and thematic synthesis of women's perceptions and experiences | To examine the drivers of disrespectful intrapartum care.                                                                                                     | yes | Systematic review & meta-synthesis | Sub-Saharan Africa, including Sudan | maternity care | physical, verbal                     | not identified | review                  | n/a                                                    | Total 25 papers from 9 African countries: detailed characteristics given in the paper |

|                                                               |      |                                                                                                                                                                                        |                                                                                                                                                              |     |                                    |                    |                |                                      |                |                                     |                                                                                                    |                                                                        |
|---------------------------------------------------------------|------|----------------------------------------------------------------------------------------------------------------------------------------------------------------------------------------|--------------------------------------------------------------------------------------------------------------------------------------------------------------|-----|------------------------------------|--------------------|----------------|--------------------------------------|----------------|-------------------------------------|----------------------------------------------------------------------------------------------------|------------------------------------------------------------------------|
| Bradley, S. ,<br>McCourt, C. ,<br>Rayment, J. ,<br>Parmar, D. | 2019 | Midwives' perspectives on (dis)respectful intrapartum care during facility-based delivery in sub-Saharan Africa: a qualitative systematic review and meta-synthesis                    | to explore the broader drivers of (dis)respectful care during facility-based delivery in the sub-Saharan African context.                                    | Yes | Systematic review & meta-synthesis | Sub-Saharan Africa | maternity care | physical, verbal                     | not identified | Qualitative review                  | Total 11 papers (10 studies) from 6 African countries: detailed characteristics given in the paper | n/a                                                                    |
| Bulto, G. A. ,<br>Demissie, D. B. ,<br>Tulu, A. S.            | 2020 | Respectful maternity care during labor and childbirth and associated factors among women who gave birth at health institutions in the West Shewa zone, Oromia region, Central Ethiopia | To assess RMC during Labor and Childbirth and associated factors among women who gave-birth at health-institutions in the West Shewa zone, Central Ethiopia. | no  | n/a                                | Ethiopia           | maternity care | physical, verbal, physical restraint | not identified | cross sectional - prevalence survey | n/a                                                                                                | 567 women who gave birth at health institutions in the West Shewa zone |

|                                                                             |      |                                                                                                                                        |                                                                                                                                                                                                                                                                                                                   |    |     |          |           |                  |                |                                                                                 |                                                                                                                                            |                                               |
|-----------------------------------------------------------------------------|------|----------------------------------------------------------------------------------------------------------------------------------------|-------------------------------------------------------------------------------------------------------------------------------------------------------------------------------------------------------------------------------------------------------------------------------------------------------------------|----|-----|----------|-----------|------------------|----------------|---------------------------------------------------------------------------------|--------------------------------------------------------------------------------------------------------------------------------------------|-----------------------------------------------|
| Burrowes, S. ,<br>Holcombe, S. J. ,<br>Jara, D. , Carter,<br>D. , Smith, K. | 2017 | Midwives' and patients' perspectives on disrespect and abuse during labor and delivery care in Ethiopia: a qualitative study           | To examine the experiences of disrespect and abuse in maternal care from the perspectives of both providers and patients.                                                                                                                                                                                         | no | n/a | Ethiopia | maternity | physical, verbal | not identified | mixed methods                                                                   | 4 midwives, 15 third year midwifery students                                                                                               | 26 women who had given birth in the last year |
| Calvo Aguilar, O. ,<br>Torres Falcon, M. ,<br>Valdez Santiago, R.           | Nov  | Obstetric violence criminalised in Mexico: a comparative analysis of hospital complaints filed with the Medical Arbitration Commission | To analyse whether criminalising obstetric violence has been conducive to the recognition and observance of the reproductive rights of women, based on the records of poor health care complaints filed by women with the Medical Arbitration Commissions (CAMs by their Spanish initials) in two Mexican states. | no | n/a | Mexico   | maternity | physical, verbal | not identified | claimed to be phenomenology: seems to be content analysis of complaints records | n/a                                                                                                                                        | 61 filed complaints from two Mexican states   |
| Chattopadhyay, S. ,<br>Mishra, A. ,<br>Jacob, S.                            | 2018 | 'Safe', yet violent? Women's experiences with obstetric violence during hospital births in rural Northeast India                       | To examine obstetric violence from the point of view of women                                                                                                                                                                                                                                                     | no | n/a | India    | maternity | physical, verbal | Feminist       | anthropology                                                                    | Discussions with physicians and community health workers (Accredited Social Health Activists, ASHAs), nurses to contextualise the findings | 66 women (25 with 'prolonged interactions')   |

|                                                                        |      |                                                                                                                          |                                                                                                                                                                                                       |    |     |        |           |                                  |                                                |             |                                                                                                |                                                                            |
|------------------------------------------------------------------------|------|--------------------------------------------------------------------------------------------------------------------------|-------------------------------------------------------------------------------------------------------------------------------------------------------------------------------------------------------|----|-----|--------|-----------|----------------------------------|------------------------------------------------|-------------|------------------------------------------------------------------------------------------------|----------------------------------------------------------------------------|
| Dwekat, I. M. M. , Tengku Ismail, T. A. , Ibrahim, M. I. , Ghrayeb, F. | 2020 | Exploring factors contributing to mistreatment of women during childbirth in West Bank, Palestine                        | To explore the views of Palestinian women and healthcare providers regarding factors contributing to the mistreatment of women during childbirth at childbirth facilities in the WestBank, Palestine. | no | n/a | Isarel | maternity | not specified (verbal mentioned) | not identified                                 | Qualitative | 5 health care providers (including nurse, midwife, public health officer, administrator roles) | 6 postpartum women who had given birth vaginally within the past six weeks |
| Forssen, A. S.                                                         | 2012 | Lifelong significance of disempowering experiences in prenatal and maternity care: interviews with elderly Swedish women | To explore how the effects of harsh and humiliating treatment, experienced by a number of Swedish women in antenatal care and childbirth in the mid-20th Century, endured for the rest of their lives | no | n/a | Sweden | maternity | verbal, physical                 | Haraway's (1991) theory of situated knowledges | qualitative | n/a                                                                                            | 20 elderly women                                                           |



|                                                                                                                                            |      |                                                                                                                                  |                                                                                                                                                       |     |               |              |                               |                     |                 |                           |                                                                                            |                                                                                            |
|--------------------------------------------------------------------------------------------------------------------------------------------|------|----------------------------------------------------------------------------------------------------------------------------------|-------------------------------------------------------------------------------------------------------------------------------------------------------|-----|---------------|--------------|-------------------------------|---------------------|-----------------|---------------------------|--------------------------------------------------------------------------------------------|--------------------------------------------------------------------------------------------|
| Fuzy, Elizabeth , Clow, Sheila Elizabeth , FouchÃ©, Nicola                                                                                 | 2020 | Please treat me like a person': respectful care during adolescent childbirth                                                     | To explore the lived childbirth experiences of mothers of middle adolescent age who were living in the Western Cape province of South Africa.         | no  | n/a           | South Africa | maternity                     | verbal              | not identified  | phenomenological approach | n/a                                                                                        | 13 mothers between 14–16 years of age                                                      |
| Grilo Diniz, C. S. , Rattner, D. , Lucas d'Oliveira, A. F. P. , de Aguiar, J. M. , Niy, D. Y.                                              | 2018 | Disrespect and abuse in childbirth in Brazil: social activism, public policies and providers' training                           | To describe and analyse the role of social movements in promoting change in maternity care, and in provider training.                                 | yes | mixed methods | various      | maternity                     | physical and verbal | ? Feminist      | integrative               | 8 studies identified: two case studies and relevant government initiatives were identified | 8 studies identified: two case studies and relevant government initiatives were identified |
| Hajizadeh, K. , Vaezi, M. , Meedy, S. , Mohammad Alizadeh Char , abi, S. , Mirghafourv , , M.                                              | 2020 | Prevalence and predictors of perceived disrespectful maternity care in postpartum Iranian women: a cross-sectional study         | To determine prevalence and predictors of perceived disrespectful maternity care among Iranian women.                                                 | no  | n/a           | Iran         | Maternity                     | physical, verbal    | not identified  | quantitative              | n/a                                                                                        | 334 postpartum women, 6-18 hrs after birth                                                 |
| Hall, K. S. , Manu, A. , Morhe, E. , Dalton, V. K. , Challa, S. , Loll, D. , Dozier, J. L. , Zochowski, M. K. , Boakye, A. , Harris, L. H. | 2018 | Bad girl and unmet family planning need among Sub-Saharan African adolescents: the role of sexual and reproductive health stigma | To explore stigma surrounding adolescent sexual and reproductive health (SRH) and its impact on young Ghanaian women's family planning (FP) outcomes. | no  | n/a           | Ghana        | Reproductive health/maternity | verbal              | ?constructivist | grounded theory           | n/a                                                                                        | 63 women and aged 15-34 years recruited from health facilities and schools                 |

|                                                    |      |                                                                                                                          |                                                                                                                                                                                                                                                                                                                                                              |    |     |          |           |                  |                |                |                               |                                                                                                                                          |
|----------------------------------------------------|------|--------------------------------------------------------------------------------------------------------------------------|--------------------------------------------------------------------------------------------------------------------------------------------------------------------------------------------------------------------------------------------------------------------------------------------------------------------------------------------------------------|----|-----|----------|-----------|------------------|----------------|----------------|-------------------------------|------------------------------------------------------------------------------------------------------------------------------------------|
| Hameed, W. ,<br>Avan, B. I.                        | 2018 | Women's experiences of mistreatment during childbirth: A comparative view of home- and facility-based births in Pakistan | To estimate the prevalence of mistreatment and types of mistreatment among women giving birth in facility- and home-based settings in Pakistan and the the association between demographics (sociodemographic ,reproductive history and empowerment status)and mistreatment, both in general and according to birth setting(whether home-or facility-based). | no | n/a | Pakistan | maternity | physical, verbal | not identified | quantitative   | n/a                           | 1,334 women who had given birth at home or in a healthcare facility over the past 12 months                                              |
| Hulton, L. A. ,<br>Matthews, Z. ,<br>Stones, R. W. | 2007 | Applying a framework for assessing the quality of maternal health services in urban India                                | To present findings from the application of a framework for assessing the quality of care of institutionalmaternity services in an urban slum in India.                                                                                                                                                                                                      | no | n/a | India    | maternity | physical, verbal | not identified | Not identified | 14 semi structured interviews | 650 women who had recently given birth (community questionnaire; 70 case note reviews and exit interviews at discharge from the hospital |

|                                              |      |                                                                                 |                                                                                                                                                                                                           |     |               |         |           |                              |                |               |                       |                       |
|----------------------------------------------|------|---------------------------------------------------------------------------------|-----------------------------------------------------------------------------------------------------------------------------------------------------------------------------------------------------------|-----|---------------|---------|-----------|------------------------------|----------------|---------------|-----------------------|-----------------------|
| Ishola, F. ,<br>Owolabi, O. ,<br>Filippi, V. | 2017 | Disrespect and abuse of women during childbirth in Nigeria: A systematic review | To synthesize current evidence on disrespect and abuse of women during child birth in Nigeria in order to understand its nature and extent, contributing factors and consequences, and propose solutions. | yes | Mixed methods | Nigeria | maternity | physical, physical restraint | not identified | mixed methods | 14 studies identified | 14 studies identified |
|----------------------------------------------|------|---------------------------------------------------------------------------------|-----------------------------------------------------------------------------------------------------------------------------------------------------------------------------------------------------------|-----|---------------|---------|-----------|------------------------------|----------------|---------------|-----------------------|-----------------------|

|                                           |      |                                                                                             |                                                                                                                                                                                                                                   |    |     |                 |           |                     |                |                 |                                                                                                                                    |                                                                                                                    |
|-------------------------------------------|------|---------------------------------------------------------------------------------------------|-----------------------------------------------------------------------------------------------------------------------------------------------------------------------------------------------------------------------------------|----|-----|-----------------|-----------|---------------------|----------------|-----------------|------------------------------------------------------------------------------------------------------------------------------------|--------------------------------------------------------------------------------------------------------------------|
| Jewkes, R. ,<br>Abrahams, N. ,<br>Mvo, Z. | 1998 | Why do nurses<br>abuse patients?<br>Reflections from<br>South African<br>obstetric services | To explore the<br>question: why do<br>nurses abuse<br>patients, through<br>presentation and<br>discussion of<br>findings of research<br>on health seeking<br>practices in one part<br>of the South African<br>maternity services. | no | n/a | South<br>Africa | maternity | physical,<br>verbal | not identified | ethnogr<br>aphy | midwives,<br>enrolled nurses,<br>family planning<br>advisors, and<br>general workers<br>(13 interviews, 3<br>group<br>discussions) | pregnant<br>women (26)<br>and 2<br>unbooked<br>women after<br>birth; postnatal<br>women (1<br>group<br>discussion) |
|-------------------------------------------|------|---------------------------------------------------------------------------------------------|-----------------------------------------------------------------------------------------------------------------------------------------------------------------------------------------------------------------------------------|----|-----|-----------------|-----------|---------------------|----------------|-----------------|------------------------------------------------------------------------------------------------------------------------------------|--------------------------------------------------------------------------------------------------------------------|

|                                                                  |        |                                                                                                                                                   |                                                                                                                                                                                  |     |               |       |           |                           |                |             |                                                                                                                                                                                                         |                                                                  |
|------------------------------------------------------------------|--------|---------------------------------------------------------------------------------------------------------------------------------------------------|----------------------------------------------------------------------------------------------------------------------------------------------------------------------------------|-----|---------------|-------|-----------|---------------------------|----------------|-------------|---------------------------------------------------------------------------------------------------------------------------------------------------------------------------------------------------------|------------------------------------------------------------------|
| Jungari, S. ,<br>Sharma, B. ,<br>Wagh, D.                        | 2019   | Beyond Maternal Mortality: A Systematic Review of Evidences on Mistreatment and Disrespect During Childbirth in Health Facilities in India        | To examine current evidence on the nature and extent of disrespect and abuse (D&A), mistreatment and practices of respectful maternity care of women during childbirth in India. | yes | mixed methods | India | maternity | physical, verbal          | not identified |             | 11 studies identified                                                                                                                                                                                   | 11 studies identified                                            |
| Oluoch-Aridi, J. ,<br>Smith-Oka, V. ,<br>Milan, E. ,<br>Dowd, R. | Dec-18 | Exploring mistreatment of women during childbirth in a peri-urban setting in Kenya: experiences and perceptions of women and healthcare providers | to explore the experiences and perceptions of both female patients and healthcare workers regarding mistreatment during childbirth                                               | no  | n/a           | Kenya | Maternity | physical, verbal, neglect | not identified | qualitative | Interviews: 6 doctors (3 male) , 2 clinical officers, (both male) 8 nurses/midwives (2 male) and 4 hospital administrators(all female) from six different health facilities (mix of public and private) | 46 interviews, 15 focus group discussions. Average age 30 years. |

|                                                                                                                                |      |                                                                                                |                                                                                                                                                                   |    |     |          |           |                      |                |                                                                                                              |                                                                                                                                                   |                                                                                              |
|--------------------------------------------------------------------------------------------------------------------------------|------|------------------------------------------------------------------------------------------------|-------------------------------------------------------------------------------------------------------------------------------------------------------------------|----|-----|----------|-----------|----------------------|----------------|--------------------------------------------------------------------------------------------------------------|---------------------------------------------------------------------------------------------------------------------------------------------------|----------------------------------------------------------------------------------------------|
| Ratcliffe, H. L. , S , o, D. , Mwanyika-S, o, M. , Chalamilla, G. , Langer, A. , McDonald, K. P.                               | 2016 | Applying a participatory approach to the promotion of a culture of respect during childbirth   | To describe the enabling factors behind a successful multi-faceted intervention aimed at reducing mistreatment of childbearing women in a large referral hospital | no | n/a | Tanzania | Maternity | physical and verbal  | not identified | Commentary on an associated intervention detailing the enabling characteristics behind it's apparent success | Wide variety of stakeholders from health ministry officials to regional health directors to facility managers to ward matrons and frontline staff | A number of women participated in the Facility 'Open Days' [no details given]                |
| S,o, D. , Kendall, T. , Lyatuu, G. , Ratcliffe, H. , McDonald, K. , Mwanyika-S, o, M. , Emil, F. , Chalamilla, G. , Langer, A. | 2014 | Disrespect and abuse during childbirth in Tanzania: are women living with HIV more vulnerable? | To compare the reported and observed experiences of disrespect and abuse during labor and delivery of women living with HIV with HIV-negative women               | N  | n/a | Tanzania | Maternity | disrespect and abuse | not identified | Mixed methods                                                                                                | Structured questionnaires (n = 50) in-depth interviews (n = 18)                                                                                   | Interviews with postpartum women (n = 2000), direct observation during childbirth (n = 208), |

|                                                                                     |      |                                                                                                               |                                                                                                                                            |   |     |        |           |                     |                |               |                                                                          |                                                  |
|-------------------------------------------------------------------------------------|------|---------------------------------------------------------------------------------------------------------------|--------------------------------------------------------------------------------------------------------------------------------------------|---|-----|--------|-----------|---------------------|----------------|---------------|--------------------------------------------------------------------------|--------------------------------------------------|
| Santiago, R. V. ,<br>Monreal, L. A. ,<br>Rojas Carmona,<br>A. , Dominguez,<br>M. S. | 2018 | "If we're here, it's only because we have no money..." discrimination and violence in Mexican maternity wards | To analyze the experiences of structural and gender discrimination against women during childbirth care at two public hospitals in Mexico. | N | n/a | Mexico | Maternity | physical and verbal | not identified | Mixed methods | Two focus groups with nursing staff (n=12), one with medical staff (n=9) | 512 women surveyed: 20 of these were interviewed |
|-------------------------------------------------------------------------------------|------|---------------------------------------------------------------------------------------------------------------|--------------------------------------------------------------------------------------------------------------------------------------------|---|-----|--------|-----------|---------------------|----------------|---------------|--------------------------------------------------------------------------|--------------------------------------------------|

|                                                                                                                                                                                                                          |      |                                                                                                                                                      |                                                                                                                                                                                                                                                               |    |     |          |           |                                                                             |                |               |                                                                               |                                                                                                               |
|--------------------------------------------------------------------------------------------------------------------------------------------------------------------------------------------------------------------------|------|------------------------------------------------------------------------------------------------------------------------------------------------------|---------------------------------------------------------------------------------------------------------------------------------------------------------------------------------------------------------------------------------------------------------------|----|-----|----------|-----------|-----------------------------------------------------------------------------|----------------|---------------|-------------------------------------------------------------------------------|---------------------------------------------------------------------------------------------------------------|
| Sharma, G. ,<br>Penn-Kekana, L.<br>, Halder, K. ,<br>Filippi, V.                                                                                                                                                         | 2019 | An investigation into mistreatment of women during labour and childbirth in maternity care facilities in Uttar Pradesh, India: a mixed methods study | To investigate the nature and context of mistreatment during labour and childbirth at public and private sector maternity facilities in Uttar Pradesh, India.                                                                                                 | no | n/a | India    | maternity | physical, verbal, over and under treatment/lack of evidence based treatment | not identified | mixed methods | n/a                                                                           | 275 mothers and their newborns at 26 hospitals in three districts of Uttar Pradesh from 26 May to 8 July 2015 |
| Sheferaw, E. D. ,<br>Bazant, E. ,<br>Gibson, H. ,<br>Fenta, H. B. ,<br>Ayalew, F. ,<br>Belay, T. B. ,<br>Worku, M. M. ,<br>Kebebu, A. E. ,<br>Woldie, S. A. ,<br>Kim, Y. M. , van<br>den Akker, T. ,<br>Stekelenburg, J. | 2017 | Respectful maternity care in Ethiopian public health facilities                                                                                      | To describe the prevalence of respectful maternity care (RMC) and mistreatment of women in hospitals and health centers, and identify factors associated with occurrence of RMC and mistreatment of women during institutional labor and childbirth services. | no | n/a | Ethiopia | maternity | physical, verbal                                                            | not identified | mixed methods | n/a                                                                           | 240 women in 28 health centers                                                                                |
| Shimoda, Kana ,<br>Leshabari,<br>Sebalda ,<br>Horiuchi,<br>Shigeke                                                                                                                                                       | 2020 | Self-reported disrespect and abuse by nurses and midwives during childbirth in Tanzania: a cross-sectional study                                     | To measure the prevalence of self-reported disrespect and abuse (D&A) by healthcare providers of women during childbirth in health facilities in Tanzania, and to clarify the factors related to D&A.                                                         | no | n/a | Tanzania | maternity | physical, verbal                                                            | not identified | survey        | 439 nurses, nursing assistants and midwives who had ever conducted deliveries | n/a                                                                                                           |



|                                   |      |                                                                           |                                                                                                                                                                                                                                                                                                                                                                                                                                                         |     |                  |       |           |                     |                |                                                |                        |                        |
|-----------------------------------|------|---------------------------------------------------------------------------|---------------------------------------------------------------------------------------------------------------------------------------------------------------------------------------------------------------------------------------------------------------------------------------------------------------------------------------------------------------------------------------------------------------------------------------------------------|-----|------------------|-------|-----------|---------------------|----------------|------------------------------------------------|------------------------|------------------------|
| Shrivastava, S. ,<br>Sivakami, M. | 2020 | Evidence of<br>'obstetric violence'<br>in India: an<br>integrative review | To collate and analyse<br>the extant literature<br>on 'obstetric<br>violence' in India and<br>analyse findings using<br>the comprehensive<br>typology of Bohren et<br>al.(2015), highlighting<br>any findings that do<br>not align with this<br>typology and to<br>develop a framework<br>to address obstetric<br>violence in India from<br>a rights-based<br>perspective within the<br>existing structural<br>and social<br>determinants of<br>health. | yes | mixed<br>methods | India | maternity | physical,<br>verbal | not identified | integrati<br>ve<br>mixed<br>method<br>s review | 16 studies<br>included | 16 studies<br>included |
|-----------------------------------|------|---------------------------------------------------------------------------|---------------------------------------------------------------------------------------------------------------------------------------------------------------------------------------------------------------------------------------------------------------------------------------------------------------------------------------------------------------------------------------------------------------------------------------------------------|-----|------------------|-------|-----------|---------------------|----------------|------------------------------------------------|------------------------|------------------------|

|                                                                                 |      |                                                                                                                                       |                                                                                                                                                                           |    |     |        |           |                     |                |                   |                                                                                          |                              |
|---------------------------------------------------------------------------------|------|---------------------------------------------------------------------------------------------------------------------------------------|---------------------------------------------------------------------------------------------------------------------------------------------------------------------------|----|-----|--------|-----------|---------------------|----------------|-------------------|------------------------------------------------------------------------------------------|------------------------------|
| Smith, J. , Banay, R. , Zimmerman, E. , Caetano, V. , Musheke, M. , Kamanga, A. | 2020 | Barriers to provision of respectful maternity care in Zambia: results from a qualitative study through the lens of behavioral science | Focus on the behavioral drivers of disrespect and abuse in Zambia to develop solutions with health workers and women that improve the experience of care during delivery. | No | n/a | Zambia | Maternity | Verbal and physical | not identified | Qualitative study | 27 staff members including maternal and child health and labor ward staff and volunteers | 15 women, 4 birth companions |
|---------------------------------------------------------------------------------|------|---------------------------------------------------------------------------------------------------------------------------------------|---------------------------------------------------------------------------------------------------------------------------------------------------------------------------|----|-----|--------|-----------|---------------------|----------------|-------------------|------------------------------------------------------------------------------------------|------------------------------|

|                                                                |      |                                                                                                       |                                                                                                                                                                                                     |    |     |          |           |                     |                |                 |     |                                                                                                |
|----------------------------------------------------------------|------|-------------------------------------------------------------------------------------------------------|-----------------------------------------------------------------------------------------------------------------------------------------------------------------------------------------------------|----|-----|----------|-----------|---------------------|----------------|-----------------|-----|------------------------------------------------------------------------------------------------|
| Solnes Miltenburg, A. , van Pelt, S. , Meguid, T. , Sundby, J. | 2018 | Disrespect and abuse in maternity care: individual consequences of structural violence                | To describe how and why women's exposure to disrespect and abuse in health facilities should be seen as symptomatic of structural violence.                                                         | no | n/a | Tanzania | Maternity | Verbal and physical | not identified | Mixed methods   | n/a | 14 women (age 22 to 37); observation of 25 antenatal visits, 3 births, 92 interviews           |
| Souza, K. J. , Rattner, D. , Gubert, M. B.                     | 2017 | Institutional violence and quality of service in obstetrics are associated with postpartum depression | To investigate the association between institutional violence in obstetrics and postpartum depression (PP depression) and the potential effect of race, age, and educational level in this outcome. | No | n/a | Brazil   | Maternity | Verbal and physical | not identified | Cross sectional | N/A | 432 women, whose children were aged up to three months - sociodemographics detailed in Table 1 |

|                                                                                                                                                                                                       |      |                                                                                                                   |                                                                                                                                                                    |    |     |           |           |                     |                                                                                                |                                                  |     |                                                                                                                                                                             |
|-------------------------------------------------------------------------------------------------------------------------------------------------------------------------------------------------------|------|-------------------------------------------------------------------------------------------------------------------|--------------------------------------------------------------------------------------------------------------------------------------------------------------------|----|-----|-----------|-----------|---------------------|------------------------------------------------------------------------------------------------|--------------------------------------------------|-----|-----------------------------------------------------------------------------------------------------------------------------------------------------------------------------|
| Vacaflor, C. H.                                                                                                                                                                                       | 2016 | Obstetric violence: a new framework for identifying challenges to maternal healthcare in Argentina                | To critically explore the concept of obstetric violence as a legal framework for identifying healthcare practices that constitute abuse and mistreatment of women. | No | n/a | Argentina | Maternity | Verbal and physical | Theoretical article to consider legal framework/ethical issues underpinning obstetric violence | Concept /opinion article                         | N/A | N/A                                                                                                                                                                         |
| Vedam, S. , Stoll, K. , Taiwo, T. K. , Rubashkin, N. , Cheyney, M. , Strauss, N. , McLemore, M. , Cadena, M. , Nethery, E. , Rushton, E. , Schummers, L. , Declercq, E. , Council, G. VtM-US Steering | 2019 | The Giving Voice to Mothers study: inequity and mistreatment during pregnancy and childbirth in the United States | To use indicators developed by service users to describe mistreatment in childbirth in the US.                                                                     | No | n/a | USA       | Maternity | All                 | not identified                                                                                 | participatory research approach to survey design | n/a | Women who experienced at least one pregnancy in the United States between 2010 and 2016, including those currently pregnant. 2138/2700 completed all sections of the survey |

|                                                                                                                                |      |                                                                                                                                                                                                             |                                                                                                                                                                                                                                                                                                       |    |     |       |           |     |                |                                                        |                                                                                                                                                                                                                                                    |                                                                                                                                                                                              |
|--------------------------------------------------------------------------------------------------------------------------------|------|-------------------------------------------------------------------------------------------------------------------------------------------------------------------------------------------------------------|-------------------------------------------------------------------------------------------------------------------------------------------------------------------------------------------------------------------------------------------------------------------------------------------------------|----|-----|-------|-----------|-----|----------------|--------------------------------------------------------|----------------------------------------------------------------------------------------------------------------------------------------------------------------------------------------------------------------------------------------------------|----------------------------------------------------------------------------------------------------------------------------------------------------------------------------------------------|
| Warren, C. E. ,<br>Ndwiga, C. ,<br>Sripad, P. ,<br>Medich, M. ,<br>Njeru, A. ,<br>Maranga, A. ,<br>Odhiambo, G. ,<br>Abuya, T. | 2017 | Sowing the seeds of transformative practice to actualize women's rights to respectful maternity care: reflections from Kenya using the consolidated framework for implementation research (Heshima project) | To capture and explain the complexity and interconnectedness of the elements of Heshima. Heshima was one of the first projects globally that measured the prevalence of disrespect and abuse during childbirth and designed and developed interventions based on the results from the baseline study. | No | n/a | Kenya | Maternity | All | not identified | Participatory Implementation Research in 13 facilities | A wide range of different stakeholders taking part in a range of data collection processes over the time of the study - not clear if all data collection processes were mutually exclusive, so total n not possible to report, but a minimum of 56 | 641 women discharged from postnatal wards at baseline compared with 728 at endline to assess the impact of the interventions. 20 interviews with community members and 51 with service users |
|--------------------------------------------------------------------------------------------------------------------------------|------|-------------------------------------------------------------------------------------------------------------------------------------------------------------------------------------------------------------|-------------------------------------------------------------------------------------------------------------------------------------------------------------------------------------------------------------------------------------------------------------------------------------------------------|----|-----|-------|-----------|-----|----------------|--------------------------------------------------------|----------------------------------------------------------------------------------------------------------------------------------------------------------------------------------------------------------------------------------------------------|----------------------------------------------------------------------------------------------------------------------------------------------------------------------------------------------|

|                                                            |      |                                                                                                                        |                                                               |    |     |       |           |                     |                |                       |                                                      |                                                                                                 |
|------------------------------------------------------------|------|------------------------------------------------------------------------------------------------------------------------|---------------------------------------------------------------|----|-----|-------|-----------|---------------------|----------------|-----------------------|------------------------------------------------------|-------------------------------------------------------------------------------------------------|
| Warren, C. E. ,<br>Njue, R. ,<br>Ndwiga, C. ,<br>Abuya, T. | 2017 | Manifestation and drivers of mistreatment of women in Kenya: implications for measurement and developing interventions | To describe mistreatment of women during childbirth in Kenya. | No | n/a | Kenya | Maternity | Verbal and physical | Not identified | Qualitative, thematic | 63 local policy makers health managers and providers | 19 women and men living locally: 50 women who had given birth in one of 13 included facilities: |
|------------------------------------------------------------|------|------------------------------------------------------------------------------------------------------------------------|---------------------------------------------------------------|----|-----|-------|-----------|---------------------|----------------|-----------------------|------------------------------------------------------|-------------------------------------------------------------------------------------------------|

|                                                                                |      |                                                                                   |                                                                                                   |    |     |      |           |                        |                |                                                  |                                    |     |
|--------------------------------------------------------------------------------|------|-----------------------------------------------------------------------------------|---------------------------------------------------------------------------------------------------|----|-----|------|-----------|------------------------|----------------|--------------------------------------------------|------------------------------------|-----|
| Warren, N. ,<br>Beebe, M. ,<br>Chase, R. P. ,<br>Doumbia, S. ,<br>Winch, P. J. | 2015 | Negegen: Sweet talk, disrespect, and abuse among rural auxiliary midwives in Mali | To explore disrespect and abuse toward women in labor from the perspective of auxiliary midwives. | No | n/a | Mali | Maternity | Mainly verbal/physical | not identified | cross-sectional, descriptive mixed-methods study | 67 mostly rural auxiliary midwives | n/a |
|--------------------------------------------------------------------------------|------|-----------------------------------------------------------------------------------|---------------------------------------------------------------------------------------------------|----|-----|------|-----------|------------------------|----------------|--------------------------------------------------|------------------------------------|-----|

| Data collection methods                                           | Apriori theory used to analyse/frame the data? | Key findings/ Themes (Author text)                                                                                                                                                                                                                       | Explicit theories used to interpret findings (includes reference/clearly defined) | Theories/ideologies implicit by authors (but not referenced/explicity named)                                                                                                                                                                                                                                                                                                          | Other interpretations used to explain the findings                                                                                                                                                                                                                                                                                                                              |
|-------------------------------------------------------------------|------------------------------------------------|----------------------------------------------------------------------------------------------------------------------------------------------------------------------------------------------------------------------------------------------------------|-----------------------------------------------------------------------------------|---------------------------------------------------------------------------------------------------------------------------------------------------------------------------------------------------------------------------------------------------------------------------------------------------------------------------------------------------------------------------------------|---------------------------------------------------------------------------------------------------------------------------------------------------------------------------------------------------------------------------------------------------------------------------------------------------------------------------------------------------------------------------------|
| exit interviews with mothers, observations of delivery and labour | Human rights theory                            | Authors argue that their findings are likely to be the result of a combination of the intervention and contextual factors (i.e. free maternity care, unchanged staffing                                                                                  | Not identified                                                                    | social engagement, hierarchy, systems theory; socio-ecological theory; behaviour change theories                                                                                                                                                                                                                                                                                      |                                                                                                                                                                                                                                                                                                                                                                                 |
| mixed methods survey                                              | Not identified                                 | Drivers of disrespect and abuse included perceptions of women being difficult, stress and burnout, facility culture and lack of                                                                                                                          | Not identified                                                                    | Provider/Implicit bias' (Labelling theory); social norms; cultural norms (social and organisational);/facility) gender based/horizontal violence, burnout/Trauma theory: street level                                                                                                                                                                                                 | Heightened arousal due to fear of being blamed for loss of baby (particularly in low resource setting with high mortality and where high staff turnover and burnout) with disrespect and abuse justified as                                                                                                                                                                     |
| n/a                                                               | Not identified                                 | thematic analysis of studies revealed the following themes: power and control (controlling knowledge, women's bodies and birthing                                                                                                                        | not identified                                                                    | Patriarchy; 'power/powerlessness'; (sexual) shaming; general cultural norms; organisational culture (routines/beurocracy), inequality (labelling)                                                                                                                                                                                                                                     | power and control as drivers of mistreatment, prioritisation of insitutional rules over womens rights or choice, social distances created by patriarchal attitudes, social inequality and sexual shaming                                                                                                                                                                        |
| semi-structured interviews                                        | Intersectionality                              | Three themes emerged during the data analysis: 1) Experiencing disrespect and abuse, 2) Perceptions of regret and shame attributed to being a single mother, and 3) The triad of vulnerability: stigma, social challenges, and health system challenges. | Intersectionality; stigma                                                         | shame (being a single mother), social and cultural norms (e.g. religious beliefs), social stigma, marginalization (multiple identities), organisational norms, moral prejudices, medicalisation of childbirth, power, discrimination, patriarchy, social construction (of motherhood) low quality maternity care (poor working conditions, heavy work load, and shortage in financial | The bad image of single mothers included being morally wrong but also being incapable of making decisions and assuming responsibilities as a mother. socio-economic marginalization because of being singlemothers, but also because they had basic education and came from poor families: also impacts of institutional failure (poor quality resources and corrupt practices) |



|                                                                                     |                                                                                                                                                                                                                                   |                                                                                                                                                                                                                                                                                                                                                                                                                                                                                                     |                       |                                                                                                                                                                                                                                  |                                                                                                                                                                                                                                                                                                                                                                                                                                                                                                                                                                                                                                                                       |
|-------------------------------------------------------------------------------------|-----------------------------------------------------------------------------------------------------------------------------------------------------------------------------------------------------------------------------------|-----------------------------------------------------------------------------------------------------------------------------------------------------------------------------------------------------------------------------------------------------------------------------------------------------------------------------------------------------------------------------------------------------------------------------------------------------------------------------------------------------|-----------------------|----------------------------------------------------------------------------------------------------------------------------------------------------------------------------------------------------------------------------------|-----------------------------------------------------------------------------------------------------------------------------------------------------------------------------------------------------------------------------------------------------------------------------------------------------------------------------------------------------------------------------------------------------------------------------------------------------------------------------------------------------------------------------------------------------------------------------------------------------------------------------------------------------------------------|
| <p>observation, background interviews, semi-structured interviews, focus groups</p> | <p>poor working conditions, violence in the surrounding area, lack of status of women, health care providers ignorance and disregard of women's rights (positioning of providers as oscillating between villains or victims).</p> | <p>Staff blamed the workload, lack of a shift system, insufficient supplies and inadequate support from management, but closer inspection revealed a complexity of interrelated factors such as low resources made worse through theft reduced and where staff were unfairly blamed by management and where motivated staff tried hard to work well but, admitted that they lost patience and shouted at women in childbirth. There were extreme examples of both abusive and vulnerable staff.</p> | <p>not identified</p> | <p>insitutional culture/norms (not kindness and respect: peer pressure), scarcity of resources, healthcare hierarchy (abuse of power), bullying, structural factors; socio-ecological; victimisation (of health care staff):</p> | <p>workload pressures (too many patients, inadequate staffing levels and staff exhaustion, lack of essential supplies), staff with chronic illnesses due to stresses and pressures of workload, fear of making mistakes, and being held accountable, unappreciated, under-valued and unsupported by management, a lack of teamwork and kindness (and bullying) between colleagues, staff blaming &amp; acusations of stealing, victimisation leading to vilianous behaviour; peer pressure to conform to toxic institutional norms of some staff not only for unintended mistakes but also for deliberate neglect, cruelty or extortion - need for accountability</p> |
| <p>quantitative questionnaire</p>                                                   | <p>not identified</p>                                                                                                                                                                                                             | <p>most service providers from these facilities had witnessed disrespectful practices during childbirth, and recognized that such practices have negative consequences for service utilization; high levels of</p>                                                                                                                                                                                                                                                                                  | <p>Not identified</p> | <p>organisational norms (disrespectful culture); horizontal violence; systems theory; socio-ecological theory; behaviour change theory</p>                                                                                       | <p>poor attitudes to respectful maternity practice; high workload, poor support from facility management, discomfort in the work environment; being disrespected and abused by service users and colleagues</p>                                                                                                                                                                                                                                                                                                                                                                                                                                                       |

|                                      |                                                                                                                                                                                                           |                                                                                                                                                                                                                                                                |                |                                                                                                                                                                                                                     |                                                                                                                                                                                                                                                                                                                                                                                                                                                          |
|--------------------------------------|-----------------------------------------------------------------------------------------------------------------------------------------------------------------------------------------------------------|----------------------------------------------------------------------------------------------------------------------------------------------------------------------------------------------------------------------------------------------------------------|----------------|---------------------------------------------------------------------------------------------------------------------------------------------------------------------------------------------------------------------|----------------------------------------------------------------------------------------------------------------------------------------------------------------------------------------------------------------------------------------------------------------------------------------------------------------------------------------------------------------------------------------------------------------------------------------------------------|
| quantitative questionnaire           | Gender theory: ie, male midwives provide more respectful maternity care, which is possibly mediated by self-esteem and stress (male gender linked to greater competence and professionalism in midwifery) | No significant association between gender and mistreatment appraisal was observed and self-esteem and stress were not found to be mediators.                                                                                                                   | Gender theory  | not identified                                                                                                                                                                                                      | the hypothesis that male midwives were less likely to mistreat service users than female midwives, due to higher self-esteem and lower life stress, was not supported by the findings, since no differences were identified                                                                                                                                                                                                                              |
| in-depth interviews and focus groups | attitudes (behavioural theory); social norms theory                                                                                                                                                       | Most women were not accepting of mistreatment, unless perceived to save the life of mother or child. Women perceived a woman's disobedience and uncooperativeness contributed to the poor treatment. Women reacted to mistreatment by accepting it, refusal to | Not identified | labelling (of women as uncooperative or difficult), social norms (about violence and how women are treated), cultural norms, gender based violence, patriarchy, systems theory (under-resourced healthcare systems) | acceptability (using mistreatment (physical and shouting) on a woman who is "difficult" helps the woman to focus and deliver silently or forces her to open her legs - which she may have closed for dignity) - providers did not feel that physical abuse during childbirth was acceptable, but thought that shouting was acceptable, perception that childbirth should be silent, insufficient drugs, equipment and physical infrastructure contribute |

|                                                              |                                                                                                                                                          |                                                                                                                                                                                                                                                                                                                                                                                                                |                                                                                                                                                                                                                                          |                                                                                                                                                                                                                                     |                                                                                                                                                                                                                                                                                                                                                                                                                                                                                                                                                                                                                                                                         |
|--------------------------------------------------------------|----------------------------------------------------------------------------------------------------------------------------------------------------------|----------------------------------------------------------------------------------------------------------------------------------------------------------------------------------------------------------------------------------------------------------------------------------------------------------------------------------------------------------------------------------------------------------------|------------------------------------------------------------------------------------------------------------------------------------------------------------------------------------------------------------------------------------------|-------------------------------------------------------------------------------------------------------------------------------------------------------------------------------------------------------------------------------------|-------------------------------------------------------------------------------------------------------------------------------------------------------------------------------------------------------------------------------------------------------------------------------------------------------------------------------------------------------------------------------------------------------------------------------------------------------------------------------------------------------------------------------------------------------------------------------------------------------------------------------------------------------------------------|
| mapping search                                               | Gender inequalities and unequal power dynamics (used a gender analysis framework for the synthesis), systems theory (under-resourced healthcare systems) | women lack information and financial assets, voice, and agency to exercise their rights. Women who defy traditional feminine stereotypes of chastity and serenity often experience mistreatment as a result. Mistreatment of women inside and outside of the health facility is normalized and accepted, including by women themselves. For health care providers, gender discrimination is manifested through | Theory of mistreatment based on gender inequalities developed using the USAID Gender Analysis Framework (based around 4 domains: access to assets, beliefs and perceptions, practices and participation, insitutions, laws and policies) | Gender inequality, gender stereotyping, patriarchy, gender discrimination, gender roles/social norms, stigma, culture norms/religious ideologies, gender-based violence, intersectionality , gender-sensitive rights-based policies | Normalization of mistreatment during childbirth, norms and stigma related to women’s behavior (transgressions from gender norms/stereotypes), mistreatment and pain in childbirth punishment for dirty or sinful behaviour, Disrespect for women’s abilities and limited access to sources as female health workers leading to frustration and burnout (and then mistreatment of women), Violence against women inside and outside of facilities (male to female but also female nurses deployed violence against clients to create social distance and maintain “fantasies of iden-tity and power in their continuous struggle to assert their professional and middle |
| interview based questionnaire with open and closed responses | not identified                                                                                                                                           | Associations between abuse and provider type, facility type, and presence of complications during delivery.; odds of being abused was four times higher in those women who experienced complications during delivery. prevalence of                                                                                                                                                                            | Not identified                                                                                                                                                                                                                           | Systems issues (including poorly resourced and pressurised health care organisations), gender and power differences (doctors mistreating more), social acceptibility (abuse of women acceptable if it ensures baby's safety)        | Higher prevalence of mistreatment in complicated cases - most likely to be the result of doctors being involved in those cases as mistreatment was reported to be higher among doctors; but, also. a high patient load at the facilities, particularly a higher-level facility where most of the complicated cases were referred could have possibly contributed in amplifying the abusive behavior of the providers.                                                                                                                                                                                                                                                   |

|                                      |                                                                                                                                                                                      |                                                                                                                                                                                                                                                                                                                                                                                                            |                                                                                                                                                              |                                                                                                                                                                                                                                                                                                                                              |                                                                                                                                                                                                                                                                                                                                                                                                                                                                                                                                                                                                                                                                                                                                               |
|--------------------------------------|--------------------------------------------------------------------------------------------------------------------------------------------------------------------------------------|------------------------------------------------------------------------------------------------------------------------------------------------------------------------------------------------------------------------------------------------------------------------------------------------------------------------------------------------------------------------------------------------------------|--------------------------------------------------------------------------------------------------------------------------------------------------------------|----------------------------------------------------------------------------------------------------------------------------------------------------------------------------------------------------------------------------------------------------------------------------------------------------------------------------------------------|-----------------------------------------------------------------------------------------------------------------------------------------------------------------------------------------------------------------------------------------------------------------------------------------------------------------------------------------------------------------------------------------------------------------------------------------------------------------------------------------------------------------------------------------------------------------------------------------------------------------------------------------------------------------------------------------------------------------------------------------------|
| in-depth interviews and focus groups | not identified                                                                                                                                                                       | Women and providers reported physical abuse including slapping, physical restraint to a delivery bed, and detainment in the hospital and verbal abuse. Women sometimes overcame tremendous barriers to reach a hospital, only to give birth on the floor, unattended by a provider. Three main factors contributing to mistreatment: poor provider attitudes, women's behavior, and                        | Not identified                                                                                                                                               | Stigma, discrimination, system failure (poorly resourced healthcare systems, staff stress and burnout), social norms (acceptability of physical abuse, especially when the baby is born healthy) , sexual shaming, Institutional norms of abuse and disrespect                                                                               | Poor provider attitudes (dealing with difficult or disobedient women), women's behavior, and health systems constraints (under-staffing, overcrowding) - HCP snapping or being 'wicked' as a result of workload pressures; stigmatising of adolescents, primiparas and women of lower socioeconomic status; women who had not prepared to give birth in the facility may be more vulnerable to mistreatment because of being judged for being pregnant too young, or they are unaware of what to expect during childbirth and appear ill-prepared; lack of belief that mistreatment is happening from HCP noting lack of specifics in reporting, indicating                                                                                   |
| systematic search                    | Over-medicalisation of childbirth, Hierarchical and bureaucratic systems, dehumanisation of women, undersourced healthcare systems, pre-service training reinforcing class and power | Two overarching analytical themes 'Power and Control' and 'Maintaining Midwives' Status; A conceptual framework was developed to show how macro-, meso- and micro-level drivers of disrespectful care interact. The synthesis revealed a prevailing model of maternity care that is institution-centred, rather than woman-centred. Women's experiences illuminate midwives' efforts to maintain power and | A conceptual framework, drawing together macro-, meso- and micro-level contexts and drivers (in line with socio-ecological theory) developed from the review | Socio-ecological theory, gender/structural inequality, colonialism, intersectionality, vertical oppression; power dynamics (hierarchies, rules, compliance and resistance), over-medicalisation of childbirth, social/regligious ideologies, social norms (expression of pain in labour), institutional rules (to control); (sexual) shaming | Midwives assertion of control over the birthing process, status of woman as bystander, maintenance of midwives professional, technical and social status, power relationships played out in the hospital were a reflection of those in wider society, where technical skill, professional education and the ability to speak English, for example, were held in high regard, rules designed to control and avoid resistance (often implicit), wider local cultural understandings of labour pain - violation of social norms - punishment by God, birth companions not allowed and where allowed not always given the option - denying women social support can be seen as another example of midwives' efforts to retain 'Power and Control' |

|                        |                                                                                                                                                                                |                                                                                                                                                                                                                                                                                                                                                                                                                                                                                     |                                                                      |                                                                                                                                                                                                                                                                                                                                                          |                                                                                                                                                                                                                                                                                                                                                                                                                                                                                                                                                                                                                                                                                                                                                              |
|------------------------|--------------------------------------------------------------------------------------------------------------------------------------------------------------------------------|-------------------------------------------------------------------------------------------------------------------------------------------------------------------------------------------------------------------------------------------------------------------------------------------------------------------------------------------------------------------------------------------------------------------------------------------------------------------------------------|----------------------------------------------------------------------|----------------------------------------------------------------------------------------------------------------------------------------------------------------------------------------------------------------------------------------------------------------------------------------------------------------------------------------------------------|--------------------------------------------------------------------------------------------------------------------------------------------------------------------------------------------------------------------------------------------------------------------------------------------------------------------------------------------------------------------------------------------------------------------------------------------------------------------------------------------------------------------------------------------------------------------------------------------------------------------------------------------------------------------------------------------------------------------------------------------------------------|
| systematic search      | Poorly resourced healthcare system, social inequalities, power dynamics, over-medicalisation of childbirth, and the socio-ecological framework developed in Bradley et al 2016 | six main themes were identified. 'Power and control' and 'Maintaining midwives' status' reflected midwives' focus on the micro-level interactions of the mother-midwife dyad. Meso-level drivers of disrespectful care were: the constraints of the 'Work environment and resources'; concerns about 'Midwives' position in the health systems hierarchy'; and the impact of 'Midwives' conceptualisations of respectful maternity care'. An emerging theme outlined the 'Impact on | Oppressed groups theory (Fiere, 1972) vs theories of professionalism | Othering, power dynamics, discrimination (racial and socioeconomic), social/institutional norms, blame culture, social inequality, poorly resourced healthcare system (deficits in the 'materiality of care'), shaming (adolescents, HIV positive), institutional hierarchies, over-medicalisation of childbirth, bullying, social and moral superiority | maintain their professional, technical and social status of midwives and awareness of not being respected in the healthcare system, asset midwives control - punishment when not doing what they are told to do, women seen as not knowing what to do as justification for shouting and hitting to promote positive health outcomes, uncertainty about the skills needed to safely assist a woman and the persistence of lithotomy position, In the South African context, delivering on all fours was linked to socioeconomic and racial discrimination, widespread use of shouting or yelling was normalised, moral judgement of younger pregnant women, midwives discriminated against certain categories of women to decide who accessed services or how |
| interview-based survey | Not identified                                                                                                                                                                 | The proportion of RMC during labor and childbirth in the study area was low. Type of institution, discussion during ANC, time of delivery, duration of stay, involvement in decision-making, the number of health workers, waiting time and consent were                                                                                                                                                                                                                            | not identified                                                       | System level factors noted such as health system resourcing, and lack of supervision at night. Some service user factors also noted                                                                                                                                                                                                                      | There were a range of factors associated with lower levels of RMC including type of healthcare setting (better RMC at health centres than in hospitals (possibly less RMC with greater caseload), and births at night more likely to be associated lower prevalence of RMC                                                                                                                                                                                                                                                                                                                                                                                                                                                                                   |

|                                                                 |                                                                                         |                                                                                                                                                                                                                                               |                                                                                       |                                                                                                           |  |
|-----------------------------------------------------------------|-----------------------------------------------------------------------------------------|-----------------------------------------------------------------------------------------------------------------------------------------------------------------------------------------------------------------------------------------------|---------------------------------------------------------------------------------------|-----------------------------------------------------------------------------------------------------------|--|
| in-depth interviews                                             | 'Structural and individual drivers' (seems to be both socio-ecological and behavioural) | Health care providers and patients report frequent physical and verbal abuse as well as non-consented care during labor and delivery. Providers report that most abuse is unintended and results from weaknesses in the health system or from | Gender theory, stigma, organisational under-resourcing, (lack of) empowerment (women) | Health system weakness, staff burnout                                                                     |  |
| documentary analysis (complaint reports)                        | Theories of professional power (-over): legal power of human rights legislation.        | Differences were observed regarding the contents of complaints, specifically in the categories of abuse, discrimination and neglect during childbirth. The narratives in the other complaint categories were similar between states.          | not identified                                                                        | sociological theory of law; empowerment to assert human rights; discrimination, gender/obstetric violence |  |
| fieldwork (interview, conversations, discussions, observations) | Gender based violence, medicalisation, patriarchy, class discrimination.                | Substantial evidence of obstetric violence reflected in iatrogenic procedures such as episiotomies, inadequate diagnosis of obstetric risks, undignified physical examinations, medical negligence, institutional unpreparedness and          | Biomedical institutionalisation, discrimination (social class), gender based violence | Intersectionality, disciplining (of women's bodies), organisational normalisation (of abuse),             |  |

|            |                                                                                                                                                                                                                           |                                                                                                                                                                                                                                                                                                                                                                                            |                |                                                                                                                                                                                                                                                                                                                                               |                                                                                                                                                                                                                                                                                                                                                                                              |
|------------|---------------------------------------------------------------------------------------------------------------------------------------------------------------------------------------------------------------------------|--------------------------------------------------------------------------------------------------------------------------------------------------------------------------------------------------------------------------------------------------------------------------------------------------------------------------------------------------------------------------------------------|----------------|-----------------------------------------------------------------------------------------------------------------------------------------------------------------------------------------------------------------------------------------------------------------------------------------------------------------------------------------------|----------------------------------------------------------------------------------------------------------------------------------------------------------------------------------------------------------------------------------------------------------------------------------------------------------------------------------------------------------------------------------------------|
| interviews | not identified                                                                                                                                                                                                            | Four themes were identified with regards to the women and healthcare providers' views about factors contributing to the mistreatment of women during childbirth in the WestBank, Palestine: limitation in childbirth facilities, factors within                                                                                                                                            | Not identified | socio-ecological theory; poorly resourced facilities, workload pressures, lack of institutional infrastructure, stress, normalisation of mistreatment (by women themselves), Institutional norms (mistreatment seen as the other way to safe lives), medicalisation of childbirth, discrimination (older women and young women, social class, | workload pressures, stress, inadequate staff to cover excessive numbers of birth (particularly on night shift), ineffective accountability mechanisms and monitoring systems, mistreatment justified to ensure cooperation from women, administrative pressure, women (midwives) having other responsibilities (social roles), primiparous women as ignorant (especially in absence of birth |
| interview  | Foucault's (1979) theory of inscription - risk of being judged "abnormal" by others is internalized, making powerful norms work from within; Jacobson's taxonomy of dignity (Jacobson, 2007, 2009b), learned helplessness | Our biomedical way of understanding risks and complications during pregnancy and birthing was confronted with many participants' feelings of distress, guilt, and grief linked to their childbearing experience. This is interpreted as "violations of dignity" and as abuse. The consequences are similar to those following traumatic birth experiences described in today's literature. | Not identified | medical power, silencing (of womens knowledge and voices), social norms ('natural' birth),                                                                                                                                                                                                                                                    |                                                                                                                                                                                                                                                                                                                                                                                              |

|                                   |                                            |                                                                                                                                                                                                                                                                                                  |                                                         |                                                                                                              |                                                                                                                                                                                                                                                                                                 |
|-----------------------------------|--------------------------------------------|--------------------------------------------------------------------------------------------------------------------------------------------------------------------------------------------------------------------------------------------------------------------------------------------------|---------------------------------------------------------|--------------------------------------------------------------------------------------------------------------|-------------------------------------------------------------------------------------------------------------------------------------------------------------------------------------------------------------------------------------------------------------------------------------------------|
| interview (with drawing activity) | Not identified                             | An overarching theme of preservation of personhood was identified. Three themes emerged i) unpreparedness for childbirth, ii) an unsettled state of mind during childbirth and iii)                                                                                                              | Not identified                                          | Victimisation - treated differently to older mothers; Othering; social norm of mistreatment                  | interpersonal relationships - mother and HCP, mistreatment more likely if mother alone, control given to midwives because of the belief that this was the only way to ensure a safe birth for baby                                                                                              |
| iterative search                  | Social movement theory; gender perspective | To promote real change in maternity care, the progression of policies and enabling environment of laws, regulations, and broad dissemination of information, need to go hand in hand with changes in all health providers' training – including a solid base in ethics, gender and human rights. | Gender theory/intersectionality social movements theory | Social movement theory; technocratic and interventionist model of care, racial inequalities, gender violence | To promote real change...policies and enabling environment of laws, regulations, and broad dissemination of information need to go hand in hand with changes in health providers training - including a solid base in ethics, gender, and human rights                                          |
| cross-sectional survey            | Not identified                             | The results showed high levels of perceived disrespectful maternity care in postpartum women. However, presence of spouses to accompany their wives in waiting rooms, the                                                                                                                        | Not identified                                          | medicalisation of childbirth, organisational failure (workload pressures, staff burnout)                     | socio-demographic factors (source of support, marital satisfaction), antenatal factors (place of prenatal care), intrapartum factors (time of birth, type of hospital, birth attendant, hospitalization duration in labour and delivery room, number of healthcare providers, augmentation with |
| interview                         | Stigma                                     | Findings focused on community norms, enacted stigma, internalised stigma, non-disclosure, and stigma resilience (through social support)                                                                                                                                                         | Stigma, fear of contagion, gender (norms) theory        | not identified                                                                                               |                                                                                                                                                                                                                                                                                                 |



|                                               |                                                                                 |                                                                                                                                                                                                                                                                                                                                                                                                                                                       |                |                                                 |                                                                                                                                                                                                                                                                                                            |
|-----------------------------------------------|---------------------------------------------------------------------------------|-------------------------------------------------------------------------------------------------------------------------------------------------------------------------------------------------------------------------------------------------------------------------------------------------------------------------------------------------------------------------------------------------------------------------------------------------------|----------------|-------------------------------------------------|------------------------------------------------------------------------------------------------------------------------------------------------------------------------------------------------------------------------------------------------------------------------------------------------------------|
| survey                                        | Not identified                                                                  | There were no significant differences in manifestations of mistreatment between facility- and home-based childbirths. Sub-group analyses for home-based births identified the same significant associations with mistreatment, with ethnicity included. In facility-based births, there was a significant relationship between women's employment and empowerment status and mistreatment. Women with prior education on birth preparedness were less | Not identified | empowerment, ethnic discrimination              | mistreatment lower in unemployed women, empowered (level of women's involvement in household decision making and prior education on birth preparedness) women and higher in women who was assisted by traditional birth attendants rather than physicians. For home birth mistreatment varied by ethnicity |
| case study (multiple data collection methods) | WHO framework for QoC (experience and technical provision/organisation of care) | Evidence that quality is far from optimal in both public and private facilities. Problems identified included a lack of essential drugs, women being left unsupported, evidence of physical and verbal abuse, and births occurring in hospitals without a health                                                                                                                                                                                      | Not identified | (Lack of) equity of care quality/discrimination |                                                                                                                                                                                                                                                                                                            |

|                   |                                                |                                                                                                                                                                                                                                                          |                |                                                                                                                                                    |                                                                                                                                                                                                                                                                                                                                                                              |
|-------------------|------------------------------------------------|----------------------------------------------------------------------------------------------------------------------------------------------------------------------------------------------------------------------------------------------------------|----------------|----------------------------------------------------------------------------------------------------------------------------------------------------|------------------------------------------------------------------------------------------------------------------------------------------------------------------------------------------------------------------------------------------------------------------------------------------------------------------------------------------------------------------------------|
| systematic search | Bowser and Hill landscape analytical framework | The type of abuse most frequently reported was non-dignified care in form of negative, poor and unfriendly provider attitude and the least frequent were physical abuse and detention in facilities. These behaviors were influenced by lowsocioeconomic | Not identified | discrimination, social sanctioning, distancing (provider > patient), organisation infrastructure, social/organisational norms (abuse as normative) | discrimination on the basis of ethnicity, low social class, low education, young age and HIV positive status, punishment for non-payment of bills/coming into hospital late, normalisation of disrespect and abuse, provider distancing as a result of training (lacking sensitivity), lack of support and supervision/accountablity, lack of training in interpersonal care |
|-------------------|------------------------------------------------|----------------------------------------------------------------------------------------------------------------------------------------------------------------------------------------------------------------------------------------------------------|----------------|----------------------------------------------------------------------------------------------------------------------------------------------------|------------------------------------------------------------------------------------------------------------------------------------------------------------------------------------------------------------------------------------------------------------------------------------------------------------------------------------------------------------------------------|

|                                  |                |                                                                                                                                                                                                                                                                                                                                                                                                                                                                                                                                                                                                                                                                                                      |                                                                                                      |                                                                                                                                                                                                                                            |                                                                                                                                                                                                                                                                                                                                                                                                                                                                                                                                                                                                                                                  |
|----------------------------------|----------------|------------------------------------------------------------------------------------------------------------------------------------------------------------------------------------------------------------------------------------------------------------------------------------------------------------------------------------------------------------------------------------------------------------------------------------------------------------------------------------------------------------------------------------------------------------------------------------------------------------------------------------------------------------------------------------------------------|------------------------------------------------------------------------------------------------------|--------------------------------------------------------------------------------------------------------------------------------------------------------------------------------------------------------------------------------------------|--------------------------------------------------------------------------------------------------------------------------------------------------------------------------------------------------------------------------------------------------------------------------------------------------------------------------------------------------------------------------------------------------------------------------------------------------------------------------------------------------------------------------------------------------------------------------------------------------------------------------------------------------|
| interviews and discussion groups | Not identified | Although women and staff explained nurses' treatment of them in terms of a few 'rotten apples in the barrel', analysis of the data revealed a complex interplay of concerns including organisational issues, professional insecurities, perceived need to assert 'control' over the environment and sanctioning of the use of coercive and punitive measures to do so, and an underpinning ideology of patient inferiority. The findings suggest that the nurses were engaged in a continuous struggle to assert their professional and middle class identity and in the process deployed violence against patients as a means of creating social distance and maintaining fantasies of identity and | Moral evaluation of patients; theories of authoritative knowledge; (assertion of) professional power | social distancing, social class, biomedical model (patient inferiority), insititutional norms, sexual shame, workload pressures, nurse-patient relationships, insecure professional identity of midwives, vertical oppression, race theory | volence and abuse justified by staff as attempts to change practices of women that may harm their baby, ritualisation of abuse (punishment for not following rules),o rganisational issues; professional concerns, including perceptions that staff were themselves abused by patients; perceived needs to assert control over the environment and patients; social sanctioning of coercive strategies including punitive actions; and, an underpinning ideology of patient ignorance and inferiority. feelings of insecurity related to clinical roles and the difficulties of performing these without what they perceived as adequate support |
|----------------------------------|----------------|------------------------------------------------------------------------------------------------------------------------------------------------------------------------------------------------------------------------------------------------------------------------------------------------------------------------------------------------------------------------------------------------------------------------------------------------------------------------------------------------------------------------------------------------------------------------------------------------------------------------------------------------------------------------------------------------------|------------------------------------------------------------------------------------------------------|--------------------------------------------------------------------------------------------------------------------------------------------------------------------------------------------------------------------------------------------|--------------------------------------------------------------------------------------------------------------------------------------------------------------------------------------------------------------------------------------------------------------------------------------------------------------------------------------------------------------------------------------------------------------------------------------------------------------------------------------------------------------------------------------------------------------------------------------------------------------------------------------------------|

|                             |                                                                                                    |                                                                                                                                                                                                                                                                                                                                        |                                                                                                                                                                                                                                                                                        |                                                                   |                                                                                                                                                                                                                                                                                                                                                                                                                                                                                                                                                                                              |
|-----------------------------|----------------------------------------------------------------------------------------------------|----------------------------------------------------------------------------------------------------------------------------------------------------------------------------------------------------------------------------------------------------------------------------------------------------------------------------------------|----------------------------------------------------------------------------------------------------------------------------------------------------------------------------------------------------------------------------------------------------------------------------------------|-------------------------------------------------------------------|----------------------------------------------------------------------------------------------------------------------------------------------------------------------------------------------------------------------------------------------------------------------------------------------------------------------------------------------------------------------------------------------------------------------------------------------------------------------------------------------------------------------------------------------------------------------------------------------|
| systematic search           | Bowser and Hill landscape analytical framework                                                     | The frequency of reported D&A was high, ranging from 10% to 77.3%. These behaviors were influenced by lack of education and empowerment of the women, their low socioeconomic status, poor training of providers and supervision and lack of                                                                                           | Bowser and Hill landscape analytical framework - contributing factors were categorized into individual and community, policy, governance, providers and service delivery factors and underutilization of skilled delivery                                                              | social class, discrimination, poorly resourced medical facilities | workload pressures, poor infrastructure, lack of training for health workers, and shortage of trained health professionals in the government health sector                                                                                                                                                                                                                                                                                                                                                                                                                                   |
| Interviews and focus groups | Framework based on Bohren's 7 different types of mistreatment - thematic analysis (Braun & Clarke) | 6 out of 7 types of mistreatment identified:- Physical abuse, verbal abuse, stigma and discrimination, poor rapport, between healthcare workers and women, failure to meet professional standards and health systems constraints. Did NOT find Sexual Abuse. Culture of blame also identified as a contributory factor to mistreatment | Stigma, discrimination based on age, ethnicity, parity, disease status, socio-economic status ('othering'), blame culture (doctors to nurses, families to doctors and nurses, doctors and nurses to mothers). Social norms (of abuse): gender based violence; abuse as a mechanism for | Health system failure (shortage of human and physical resources)  | <b>Organizational culture of blame</b> leads to staff blaming (and abusing women) for 'having too many babies', 'being too young to be pregnant', 'not attending ANC', etc; <b>Social Norms</b> - The nurses in the study, at the end of a delivery, would often convince the patients that without the beatings their children would have been harmed and had adverse outcomes. Conversely to the concerns expressed by the women, the healthcare workers prided themselves on having been taught to be "firm" with their patients.<br><b>Structural Failings</b> - At the individual level |

|                                                  |                                                                                                          |                                                                                                                                                                                                                                                                                                                                                                              |                       |                                                                                                                                                                                                                                                                                         |                                           |
|--------------------------------------------------|----------------------------------------------------------------------------------------------------------|------------------------------------------------------------------------------------------------------------------------------------------------------------------------------------------------------------------------------------------------------------------------------------------------------------------------------------------------------------------------------|-----------------------|-----------------------------------------------------------------------------------------------------------------------------------------------------------------------------------------------------------------------------------------------------------------------------------------|-------------------------------------------|
| <p>Not discussed -this is a commentary piece</p> | <p>Alludes to Bohren's 7 different types of mistreatment - used to inform the primary study outcomes</p> | <p>Main study found significant reductions in D&amp;A outcome measures between baseline and PN following the introduction of a complex intervention incorporating 1. Open Days for expectant women to attend the facility and be shown round by staff members<br/>2. A series of 6 interactive RMC workshops attended by key stakeholders at all levels of health system</p> | <p>Not identified</p> | <p>Abuse is linked to learned behaviour; success factors include consensus theory facilitated by a form of participatory action research; socio-ecological theory (the intervention worked at the micro, macro and meso level). Empowerment, communication, attitude, relationships</p> | <p>See main paper for further details</p> |
| <p>questionnaires, interviews, observation</p>   | <p>Stigma</p>                                                                                            | <p>No differences in D&amp;A between women living with HIV and women who were HIV-ve but relatively high levels of D&amp;A in both groups (12.2% vs 15%). However none of the WLWH were asked for consent prior</p>                                                                                                                                                          | <p>Not identified</p> | <p>(Lack of) Stigma</p>                                                                                                                                                                                                                                                                 |                                           |

|                                                         |                                                                           |                                                                                                                                                                                                                                                                                                                                                                                                                                                                                                                                                                                                                                                                                                                                         |                               |                                                                                                                                                                                                                                                                                                               |  |
|---------------------------------------------------------|---------------------------------------------------------------------------|-----------------------------------------------------------------------------------------------------------------------------------------------------------------------------------------------------------------------------------------------------------------------------------------------------------------------------------------------------------------------------------------------------------------------------------------------------------------------------------------------------------------------------------------------------------------------------------------------------------------------------------------------------------------------------------------------------------------------------------------|-------------------------------|---------------------------------------------------------------------------------------------------------------------------------------------------------------------------------------------------------------------------------------------------------------------------------------------------------------|--|
| <p>Cross sectional survey, interviews, focus groups</p> | <p>Theory of discrimination according to Krieger: structural violence</p> | <p>According to Krieger [3], discrimination is a socially structured and sanctioned phenomenon identifiable by the preeminence of a dominant social group. Justified by the ideology of the dominant actors, discrimination translates into individual and institutional interactions that ensure the privileges of the dominant group. Expressions denoting stigmatization and discrimination against women on the part of health-care professionals were identified in the narratives of both women and professionals with regard to the following characteristics: (a) physical appearance, (b) poverty and (c) status as women. Furthermore, the self-perception of belonging to a disadvantaged social class was identified in</p> | <p>Stigma, discrimination</p> | <p>Structural, gender, socio-economic discrimination, social normalisation of violence, exacerbated by women's passive acceptance of mistreatment and lack of understanding of their rights as well as health professionals ignorance of fundamental rights and a lack of regulation. (Intersectionality)</p> |  |
|---------------------------------------------------------|---------------------------------------------------------------------------|-----------------------------------------------------------------------------------------------------------------------------------------------------------------------------------------------------------------------------------------------------------------------------------------------------------------------------------------------------------------------------------------------------------------------------------------------------------------------------------------------------------------------------------------------------------------------------------------------------------------------------------------------------------------------------------------------------------------------------------------|-------------------------------|---------------------------------------------------------------------------------------------------------------------------------------------------------------------------------------------------------------------------------------------------------------------------------------------------------------|--|

|                                                                     |                                                                                                                   |                                                                                                                                                                                                                                                                                                                 |                                               |                                                                                                                                                                  |                                                                                                                                                                                                                                                                                                                                                                                                                                                                                                                       |
|---------------------------------------------------------------------|-------------------------------------------------------------------------------------------------------------------|-----------------------------------------------------------------------------------------------------------------------------------------------------------------------------------------------------------------------------------------------------------------------------------------------------------------|-----------------------------------------------|------------------------------------------------------------------------------------------------------------------------------------------------------------------|-----------------------------------------------------------------------------------------------------------------------------------------------------------------------------------------------------------------------------------------------------------------------------------------------------------------------------------------------------------------------------------------------------------------------------------------------------------------------------------------------------------------------|
| Clinical observations and open-ended comments recorded by observers | Not identified                                                                                                    | Mistreatment of women frequently occurs in both private and public sector facilities. Comments by observers provide further contextual insights into the quantitative data, and additional themes of mistreatment, such as deficiencies in infection                                                            | Not identified                                | Social class, discrimination, poorly resourced medical facilities, inequalities of information, wealth, and power, institutionalised bribery (informal payments) | mistreatment higher women attending district hospitals, women above 35 years, primiparous, those that were referred from another facility, women belonging to the "scheduled caste and tribe", those in the fifth (richest) wealth quintile, and amongst cases admitted during work-hours on weekday in the public sector; births conducted by unqualified personnel leading to anxiety, resource-                                                                                                                    |
| Observation                                                         | Not identified                                                                                                    | Health centers demonstrated higher RMC performance than hospitals. At least one form of mistreatment of women was committed in 36% of the observations (38% in health centers and 32% in hospitals). Quality improvement using SBM-R© and having a companion during labor and delivery were associated with RMC | Not identified                                | Social distance, power and identity (women > women); gender theory; burnout                                                                                      | Having a birth companion, type of health worker (males more likely to provide RMC) - triple burdens faced by female midwives: (1) reproductive (childbearing), (2) productive (economic), and (3) community management (e.g. un-paid work in support of the community). The effect of social, economic and professional barriers resulted in moral distress and burn out, which may have led to abusive behavior: quality of care improved by companionship and implementation of SBM-R© quality improvement approach |
| cross-sectional survey                                              | Working conditions predict disrespect and abuse, and D&A undermines trust between women and health care providers | D&A scores increased with an increase in 'working hours per week' and 'taking a break during evening shifts'. D&A scores decreased with an increase in the scores of the two components of the Index of Working Satisfaction (professional status and interaction between nurses)', and 'any type of            | Demoralisation, decreased motivation, burnout | Workplace dynamics (relational), professional identity                                                                                                           | Work load pressures and workplace satisfaction, heavy workload, poor relations with co-workers, (lack of) pride in their own job and lack of supervision, more breaks during night shifts linked to higher levels of D&A, higher job motivation linked to professional identity                                                                                                                                                                                                                                       |

|                   |                                                                                           |                                                                                                                                                                                                                                                                                                                                                                                                                                                                                                                |                                                                                                                                                                                                                                                                               |                                                                                                                                                                     |                                                                                                                                                                                                                                                                                                                                                                              |
|-------------------|-------------------------------------------------------------------------------------------|----------------------------------------------------------------------------------------------------------------------------------------------------------------------------------------------------------------------------------------------------------------------------------------------------------------------------------------------------------------------------------------------------------------------------------------------------------------------------------------------------------------|-------------------------------------------------------------------------------------------------------------------------------------------------------------------------------------------------------------------------------------------------------------------------------|---------------------------------------------------------------------------------------------------------------------------------------------------------------------|------------------------------------------------------------------------------------------------------------------------------------------------------------------------------------------------------------------------------------------------------------------------------------------------------------------------------------------------------------------------------|
| systematic search | Gender based violence; medicalisation; gender inequality; womens rights-based perspective | 'Obstetric violence' in India was found to be associated with socio-demographic factors, with women of lower social standing experiencing greater levels of mistreatment. In response to this normalized public health issue, a multi-pronged, rights-based framework is proposed that addresses the social, political and structural contexts of 'obstetric violence' in India....heavy workload, poor relation with co-workers, pride in their own job, and lack of supervision related to self-reported D&A | Cultural health capital (poor women and with lower social standing experience abuse), framework of obstetric violence suggested including enabling factors (social factors, harmful cultural practices, systemic barriers, historic normalisation) and areas for intervention | Stigma, discrimination, poorly resourced facilities (skills of staff), medical treatment norms, acceptance of abuse (norms), normalisation of gender-based violence | Low socio-economic status most likely to experience mistreatment, not having a skilled birth attendant present - medical negligence, chaotic and unsafe facilities, punishment for non-payment for services, harmful tradition practices and beliefs (i.e. fasting to dry the mothers body), delivery complications, expectation of suppression of pain (woman to be silent) |
|-------------------|-------------------------------------------------------------------------------------------|----------------------------------------------------------------------------------------------------------------------------------------------------------------------------------------------------------------------------------------------------------------------------------------------------------------------------------------------------------------------------------------------------------------------------------------------------------------------------------------------------------------|-------------------------------------------------------------------------------------------------------------------------------------------------------------------------------------------------------------------------------------------------------------------------------|---------------------------------------------------------------------------------------------------------------------------------------------------------------------|------------------------------------------------------------------------------------------------------------------------------------------------------------------------------------------------------------------------------------------------------------------------------------------------------------------------------------------------------------------------------|



|                         |                           |                                                                                                                                                                                                                                                                                                                                                                                                                                                                                                                                                                                                                                                                                                                                                                                  |                                                                                                                                                        |                                                                        |                                                                                                                                                                                                                                                                                                                                                                                                                                                                                          |
|-------------------------|---------------------------|----------------------------------------------------------------------------------------------------------------------------------------------------------------------------------------------------------------------------------------------------------------------------------------------------------------------------------------------------------------------------------------------------------------------------------------------------------------------------------------------------------------------------------------------------------------------------------------------------------------------------------------------------------------------------------------------------------------------------------------------------------------------------------|--------------------------------------------------------------------------------------------------------------------------------------------------------|------------------------------------------------------------------------|------------------------------------------------------------------------------------------------------------------------------------------------------------------------------------------------------------------------------------------------------------------------------------------------------------------------------------------------------------------------------------------------------------------------------------------------------------------------------------------|
| Observations, interview | Behavioural design theory | <p>1) providers do not consider the decision to provide respectful care because they believe they are doing what they are expected to do, 2) providers do not consider the decision to provide respectful care explicitly since abuse and violence are normalized and therefore the default, 3) providers may decide that the costs of providing respectful care outweigh the gains, 4) providers believe they do not need to provide respectful care, and 5) providers may change their mind about the quality of care they will provide when they believe that disrespectful care will assist their clinical objectives.</p> <p>Context related issues associated with the barriers are supervisory systems, visual cues, social constructs, clinical processes, and other</p> | Mental model focused on clinical functions and death avoidance - automaticity directing actions (based on cognitive availability) , cognitive scarcity | Stigma; organisation and cultural norms of violence; power and control | Lack of training/awareness; lack of guidelines; lack of consequences; low income status of patient; lack of feedback mechanisms; lack of provider-client rapport; (mis) perception that clients value it; prevention of complaints of negligence directs focus to preventing infant death (at cost to the mother); clients do not follow provider instructions due to previous negative births; they take herbs/remedies to speed up labour (which complicates the work of the provider) |
|-------------------------|---------------------------|----------------------------------------------------------------------------------------------------------------------------------------------------------------------------------------------------------------------------------------------------------------------------------------------------------------------------------------------------------------------------------------------------------------------------------------------------------------------------------------------------------------------------------------------------------------------------------------------------------------------------------------------------------------------------------------------------------------------------------------------------------------------------------|--------------------------------------------------------------------------------------------------------------------------------------------------------|------------------------------------------------------------------------|------------------------------------------------------------------------------------------------------------------------------------------------------------------------------------------------------------------------------------------------------------------------------------------------------------------------------------------------------------------------------------------------------------------------------------------------------------------------------------------|

|                         |                                                                                                                                           |                                                                                                                                                                                                                                                                                                                                |                                                                                                          |                                                                                                                                                                                   |                                                                                                                                                                                                          |
|-------------------------|-------------------------------------------------------------------------------------------------------------------------------------------|--------------------------------------------------------------------------------------------------------------------------------------------------------------------------------------------------------------------------------------------------------------------------------------------------------------------------------|----------------------------------------------------------------------------------------------------------|-----------------------------------------------------------------------------------------------------------------------------------------------------------------------------------|----------------------------------------------------------------------------------------------------------------------------------------------------------------------------------------------------------|
| Observations, interview | Gender inequalities; structural violence; burnout; health system failures                                                                 | Elements of supportive care were identified (but not extracted); Details of types of unsupportive behaviours mapped in the tables, e.g. Psychological abuse, abandonment, privacy violation, non-supportive care; qualitative analysis was themed - Normalisation of absence of care; Justification of punishment and rewards; | Authoritative knowledge                                                                                  | Systemic gender inequality; normalisation of abuse; organisational culture of disrespect/abuse; power; structural inequalities (i.e. hierarchical power structures for providers) | health system challenges; poor working conditions                                                                                                                                                        |
| Questionnaire           | States 'conceptual model of quality of care at childbirth used to build the indicators of violence' (based on one of the author's thesis) | institutional violence in obstetric care are positively associated with postpartum depression, Positive interactions between: violence by negligence by health care professionals and race and age; physical violence from health care professionals and age; and, verbal violence from health care professionals and race.    | Social and organisational normalisation of absence of care, of violence, and of abuse, gender inequality | Organisational norms, (behavioural change theory), power inequalities (women and staff), vertical discrimination                                                                  | Black, indigenous, and migrant women are the ones who suffer more discrimination in their access to health care services and who are usually the most vulnerable to this type of institutional violence. |

|        |                                            |                                                                                                                                                                                                                                                                                                                                                                                                                          |                                                                          |                                                                                                                                                                                                                                                                      |  |
|--------|--------------------------------------------|--------------------------------------------------------------------------------------------------------------------------------------------------------------------------------------------------------------------------------------------------------------------------------------------------------------------------------------------------------------------------------------------------------------------------|--------------------------------------------------------------------------|----------------------------------------------------------------------------------------------------------------------------------------------------------------------------------------------------------------------------------------------------------------------|--|
| N/A    | Violence against women                     | Obstetric violence is a public health issue; a human rights violation; unethical gender stereotyping                                                                                                                                                                                                                                                                                                                     | Gender theory                                                            | Over medicalisation; converting natural processes of reproduction into pathological ones; gender stereotyping/masculine medical culture (treating them as vulnerable individuals, incapable of controlling their own bodies or understanding their own experiences). |  |
| Survey | Discrimination on the grounds of ethnicity | One in six women (17.3%) reported experiencing one or more types of mistreatment such as: loss of autonomy; being shouted at, scolded, or threatened; and being ignored, refused, or receiving no response to requests for help. Context of care (e.g. mode of birth; transfer; difference of opinion) correlated with increased reports of mistreatment. Experiences of mistreatment differed significantly by place of | Discrimination (specifically on grounds of ethnicity), Intersectionality | Organisational norms; medicalisation                                                                                                                                                                                                                                 |  |

|                                                                                                                                                                                                                                                                      |                                                                                                                                                                                                                                                                                             |                                                                                                                                                                                                                                                                                                                                                                     |                       |                                                                                                                                                                                                                                                                                                                                                                                                                                                                                                                                                                                                                                                                                                                                |  |
|----------------------------------------------------------------------------------------------------------------------------------------------------------------------------------------------------------------------------------------------------------------------|---------------------------------------------------------------------------------------------------------------------------------------------------------------------------------------------------------------------------------------------------------------------------------------------|---------------------------------------------------------------------------------------------------------------------------------------------------------------------------------------------------------------------------------------------------------------------------------------------------------------------------------------------------------------------|-----------------------|--------------------------------------------------------------------------------------------------------------------------------------------------------------------------------------------------------------------------------------------------------------------------------------------------------------------------------------------------------------------------------------------------------------------------------------------------------------------------------------------------------------------------------------------------------------------------------------------------------------------------------------------------------------------------------------------------------------------------------|--|
| <p>Focus group discussions, in-depth interviews, and dialogues with participants and beneficiaries, observations of client-provider interactions, client exit interviews, provider interviews, facility inventories, before and after survey of prevalence data.</p> | <p>Yes, through use of the Consolidated Framework for Implementation Research CFIR. Participatory research also led to tailoring of the intervention package in relation to local power dynamics and human rights issues, including discrimination and unequal power relations, between</p> | <p>Critical element: readiness to change. Need for flexibility and adaptability. Also important: Participatory and consultative processes; RMC workshops with attention to staff wellbeing; Community involvement; Consensus building. Changes were affected by shifting national maternity policies. CFIR was partially useful, but PAR was a critical element</p> | <p>Not identified</p> | <p>Systems theory. Power and resistance to power (Foucault?). The change process included attention to whole system issues of power and control (implicitly socio-ecological theory), and to creation of initial conditions for tipping points (all implicit) namely: values clarification, advocacy; community and national dialogue, new resources and curricula, mentorship, quality improvement, mediation training, counselling for providers, transparency (open days in the facilities), monitoring of D&amp;A, community outreach and inreach, male involvement/education. Caring for the carers was emphasised. The Heshima theory of change model was developed (focused on meso and macro levels of the system)</p> |  |
|----------------------------------------------------------------------------------------------------------------------------------------------------------------------------------------------------------------------------------------------------------------------|---------------------------------------------------------------------------------------------------------------------------------------------------------------------------------------------------------------------------------------------------------------------------------------------|---------------------------------------------------------------------------------------------------------------------------------------------------------------------------------------------------------------------------------------------------------------------------------------------------------------------------------------------------------------------|-----------------------|--------------------------------------------------------------------------------------------------------------------------------------------------------------------------------------------------------------------------------------------------------------------------------------------------------------------------------------------------------------------------------------------------------------------------------------------------------------------------------------------------------------------------------------------------------------------------------------------------------------------------------------------------------------------------------------------------------------------------------|--|

|                             |    |                                                                                                                                                                                                                                                                                                                                                                                                                                                                                                                                                                                                                                                                                                |                                                                                                                                                                                                                                                                                                                                       |                         |                                                                                                                                                                                                                                                                               |
|-----------------------------|----|------------------------------------------------------------------------------------------------------------------------------------------------------------------------------------------------------------------------------------------------------------------------------------------------------------------------------------------------------------------------------------------------------------------------------------------------------------------------------------------------------------------------------------------------------------------------------------------------------------------------------------------------------------------------------------------------|---------------------------------------------------------------------------------------------------------------------------------------------------------------------------------------------------------------------------------------------------------------------------------------------------------------------------------------|-------------------------|-------------------------------------------------------------------------------------------------------------------------------------------------------------------------------------------------------------------------------------------------------------------------------|
| Interviews and focus groups | No | <p>Women describe: their negative experiences of childbirth; frustration with lack of confidentiality and autonomy; abandonment by the providers, and dirty maternity units. Providers admit to challenges but describe reasons for apparent abuse (eg slapping on thighs to encourage women to focus on birthing process) and 'detention' is because relatives have abandoned them. Men try to overcome challenges by paying providers to ensure they look after their wives. Drivers of mistreatment are perpetuated by social and gender norms at family and community levels. At facility level, poor managerial oversight, provider demotivation, and lack of equipment and supplies.</p> | <p>Stigma and discrimination (age, young/old; high parity; socio economics); structural gender inequality (social and gender norms at family and community level); power imbalance (women/staff and staff/staff), 'structural disrespect' (poor facilities, lack of resources, staff maltreated, poor management and supervision)</p> | Victim blaming, shaming | <p>Structural disrespect' - that is that poor facilities and resources are also a marker of systemic disrespect, and these may engender abusive behaviours - if staff don't feel valued and respected they can't do a good job, clinically or psychologically/emotionally</p> |
|-----------------------------|----|------------------------------------------------------------------------------------------------------------------------------------------------------------------------------------------------------------------------------------------------------------------------------------------------------------------------------------------------------------------------------------------------------------------------------------------------------------------------------------------------------------------------------------------------------------------------------------------------------------------------------------------------------------------------------------------------|---------------------------------------------------------------------------------------------------------------------------------------------------------------------------------------------------------------------------------------------------------------------------------------------------------------------------------------|-------------------------|-------------------------------------------------------------------------------------------------------------------------------------------------------------------------------------------------------------------------------------------------------------------------------|

|                       |                                                                                                                                                 |                                                                                                                                                                                                                                                                                                                                                            |                |                                                         |  |
|-----------------------|-------------------------------------------------------------------------------------------------------------------------------------------------|------------------------------------------------------------------------------------------------------------------------------------------------------------------------------------------------------------------------------------------------------------------------------------------------------------------------------------------------------------|----------------|---------------------------------------------------------|--|
| Survey and interviews | Normative conduct theory.<br>Background notes importance of health systems factors, power differentials, gender based violence (against women); | Participants reported that it was normative in their setting to use abusive and disrespectful behaviour toward women, particularly yelling, insulting, and displaying a hostile or aggressive attitude. However, auxiliary midwives also stressed the importance of making women feel welcome and comfortable, sweet-talking to them throughout labor, and | Not identified | Structural gender violence;<br>Strengths-based approach |  |
|-----------------------|-------------------------------------------------------------------------------------------------------------------------------------------------|------------------------------------------------------------------------------------------------------------------------------------------------------------------------------------------------------------------------------------------------------------------------------------------------------------------------------------------------------------|----------------|---------------------------------------------------------|--|

| Authors                                            | Year of publication | Title                                                                                                            | Aim of study                                                                                                                                                            | Review (yes / no) | Type of review | Country   | Study context - maternity care, elderly population, | Type of Mistreatment (physical, verbal, physical restraint) | Theoretical perspective (i.e. constructivist, feminist) to undertake study |
|----------------------------------------------------|---------------------|------------------------------------------------------------------------------------------------------------------|-------------------------------------------------------------------------------------------------------------------------------------------------------------------------|-------------------|----------------|-----------|-----------------------------------------------------|-------------------------------------------------------------|----------------------------------------------------------------------------|
| Asmaningrum, N. and Kurniawati, D. and Tsai, Y. F. | 2020                | Threats to patient dignity in clinical care settings: A qualitative comparison of Indonesian nurses and patients | To explore and compare nurses' and patients' viewpoints of disrespectful behaviours that threaten patient dignity during hospitalised care.                             | No                | n/a            | Indonesia | Hospital - Medical and surgical wards               | physical and verbal                                         | not identified                                                             |
| Attar-Schwartz, Shalhevet                          | 2011                | Maltreatment by Staff in Residential Care Facilities: The Adolescents' Perspectives                              | This study examines the prevalence and multilevel correlates of verbal and physical mal-treatment of 1,324 Israeli adolescents by staff in 32 residential care settings | No                | n/a            | Israel    | Residential care                                    | Verbal and physical                                         | ecological-integrative model                                               |

|                                                                                                                                                            |             |                                                                                                                             |                                                                                                                                                                                             |            |                                                                                                      |            |                   |                                                                         |                       |
|------------------------------------------------------------------------------------------------------------------------------------------------------------|-------------|-----------------------------------------------------------------------------------------------------------------------------|---------------------------------------------------------------------------------------------------------------------------------------------------------------------------------------------|------------|------------------------------------------------------------------------------------------------------|------------|-------------------|-------------------------------------------------------------------------|-----------------------|
| <p>Ayhan, Cemile<br/>Hurrem Balik and<br/>Bilgin, HÃ¼lya and<br/>Uluman, Ozgu<br/>Tekin and Sukut,<br/>Ozge and Yilmaz,<br/>Sevil and Buzlu,<br/>Sevim</p> | <p>2020</p> | <p>A Systematic Review of the<br/>Discrimination Against<br/>Sexual and Gender<br/>Minority in Health Care<br/>Settings</p> | <p>To determine discrimination<br/>experiences of sexual and gender<br/>minority (SGM) individuals and<br/>attitudes toward SGM among<br/>health care staff in health care<br/>settings</p> | <p>Yes</p> | <p>Doesn't specify<br/>- just<br/>systematic -<br/>with results<br/>written by<br/>descriptively</p> | <p>N/A</p> | <p>Healthcare</p> | <p>Relates to<br/>exploring<br/>discrimination<br/>(so more verbal)</p> | <p>not identified</p> |
|------------------------------------------------------------------------------------------------------------------------------------------------------------|-------------|-----------------------------------------------------------------------------------------------------------------------------|---------------------------------------------------------------------------------------------------------------------------------------------------------------------------------------------|------------|------------------------------------------------------------------------------------------------------|------------|-------------------|-------------------------------------------------------------------------|-----------------------|



|                                                                                 |      |                                                                                                   |                                                                                                                                                                                                                                                            |     |       |         |                    |          |                |
|---------------------------------------------------------------------------------|------|---------------------------------------------------------------------------------------------------|------------------------------------------------------------------------------------------------------------------------------------------------------------------------------------------------------------------------------------------------------------|-----|-------|---------|--------------------|----------|----------------|
| Baker, P. R. and Francis, D. P. and Hairi, N. N. and Othman, S. and Choo, W. Y. | 2016 | Interventions for preventing abuse in the elderly                                                 | assess the effectiveness of primary, secondary and tertiary intervention programmes used to reduce or prevent abuse of the elderly in their own home, in organisational or institutional and community settings                                            | yes | quant | various | elderly            | all      | not identified |
| Braaten, K. L. and Malmedal, W.                                                 | 2017 | Preventing physical abuse of nursing home residents- as seen from the nursing staff's perspective | capture first- hand information from nursing home staff's own understanding regarding what they think and have experienced about prevention of physical abuse of nursing home residents and what measures they consider useful to implement in their daily | No  | n/a   | Norway  | elderly population | physical | not identified |

|                                        |      |                                                                                                                                            |                                                                                                                                                        |    |     |                |                                         |                                                                |                                                                                                                                                                                                                                                |
|----------------------------------------|------|--------------------------------------------------------------------------------------------------------------------------------------------|--------------------------------------------------------------------------------------------------------------------------------------------------------|----|-----|----------------|-----------------------------------------|----------------------------------------------------------------|------------------------------------------------------------------------------------------------------------------------------------------------------------------------------------------------------------------------------------------------|
| Braun, Kathryn L. and Suzuki, Kathy M. | 1997 | Developing and testing training materials on elder abuse and neglect for nurse aides                                                       | to report on the development of training resources to prevent mistreatment                                                                             | no | n/a | Hawaii         | elderly population                      | not specifically mentioned - just abuse, infers physical abuse | not identified                                                                                                                                                                                                                                 |
| Buzgová, R. and IvanovĀi, K.           | 2009 | Elder abuse and mistreatment in residential settings                                                                                       | The aim of this study was to describe employees' and clients' lived experiences of elder abuse.                                                        | no | n/a | Czech Republic | elderly population                      | physical, verbal                                               | not identified                                                                                                                                                                                                                                 |
| Cambridge, Paul                        | 1999 | The First Hit: a case study of the physical abuse of people with learning disabilities and challenging behaviours in a residential service | To describe the circumstances surrounding the physical abuse of persons with learning disabilities and challenging behaviours in a residential service | No | n/a | UK             | learnig disability, residential setting | physical                                                       | Multiple theories, including Goffman, Foucault ((total 'institution theory'); disabilitist theory (Wolfensberger); normalisation theory, some allusion to neoliberal approaches to funding for social care. To address the issues: empowerment |

|                                                                                                          |      |                                                                                                                                                                                                               |                                                                                                                                                                                                                |     |            |               |                                                        |                                      |                      |
|----------------------------------------------------------------------------------------------------------|------|---------------------------------------------------------------------------------------------------------------------------------------------------------------------------------------------------------------|----------------------------------------------------------------------------------------------------------------------------------------------------------------------------------------------------------------|-----|------------|---------------|--------------------------------------------------------|--------------------------------------|----------------------|
| Castro, A. and Savage, V. and Kaufman, H.                                                                | 2015 | Assessing equitable care for Indigenous and Afrodescendant women in Latin America                                                                                                                             | To identify and understand the barriers to equitable care within health care settings that women of ethnic minorities encounter in Latin America and to examine possible strategies for mitigating the issues. | Yes | structured | Latin America | Indigenous and ethnic minority women using health care | All                                  | not identified       |
| Ceron, A. and Ruano, A. L. and Sanchez, S. and Chew, A. S. and Diaz, D. and Hernandez, A. and Flores, W. | 2016 | Abuse and discrimination towards indigenous people in public health care facilities: experiences from rural Guatemala                                                                                         | to understand and categorize the episodes of discrimination as reported by indigenous communities seeking health care in rural Guatemala                                                                       | No  | n/a        | Guatemala     | Indigenous people using public health facilities       | All                                  | not identified       |
| Conner, T. and Prokhorov, A. and Page, C. and Fang, Y. and Xiao, Y. and Post, L. A.                      | 2011 | Impairment and abuse of elderly by staff in long-term care in Michigan: evidence from structural equation modeling                                                                                            | To place known factors associated with elder abuse in a causal structure that relates the factors to each other and to whether abuse occurs.                                                                   | No  | n/a        | USA           | Elderly                                                | physical                             | Positivist (implied) |
| Cooper, C. and Dow, B. and Hay, S. and Livingston, D. and Livingston, G.                                 | 2013 | Care workers' abusive behavior to residents in care homes: a qualitative study of types of abuse, barriers, and facilitators to good care and development of an instrument for reporting of abuse anonymously | development of a questionnaire to report abuse                                                                                                                                                                 | no  | n/a        | UK            | elderly population                                     | physical, verbal, physical restraint | not identified       |

|                                                                                                                |      |                                                                           |                                                                                                                                                                                                                                                                   |     |           |         |                        |                                     |                |
|----------------------------------------------------------------------------------------------------------------|------|---------------------------------------------------------------------------|-------------------------------------------------------------------------------------------------------------------------------------------------------------------------------------------------------------------------------------------------------------------|-----|-----------|---------|------------------------|-------------------------------------|----------------|
| Corbi, G. and Grattagliano, I. and Ivshina, E. and Ferrara, N. and Solimeno Cipriano, A. and Campobasso, C. P. | 2015 | Elderly abuse: risk factors and nursing role                              | to examine the available literature in the last 5 years to define the state of art on this phenomenon, with particular regard to the nursing role in elderly abuse, focusing on the possible types of mistreatment, the motivations and preventive interventions. | yes | narrative | various | elderly population     | abuse generally mentioned           | not identified |
| Eren, N.                                                                                                       | 2014 | Nurses' attitudes toward ethical issues in psychiatric inpatient settings | to evaluate the ethical beliefs of psychiatric nurses and ethical problems encountered.                                                                                                                                                                           | no  | n/a       | Turkey  | psychiatric inpatients | verbal abuse and physical restraint | not identified |

|                                                                           |      |                                                                        |                                                                                                                                                                                                                                |    |     |          |         |                   |                |
|---------------------------------------------------------------------------|------|------------------------------------------------------------------------|--------------------------------------------------------------------------------------------------------------------------------------------------------------------------------------------------------------------------------|----|-----|----------|---------|-------------------|----------------|
| Fraza, S. L. and<br>Correia, A. M. and<br>Norton, P. and<br>Magalhaes, T. | 2015 | Physical abuse against<br>elderly persons in<br>institutional settings | to provide a better knowledge<br>about physical abuse<br>against elderly people in<br>institutional settings, in order to<br>contribute to a timely detection,<br>correct forensic diagnosis and<br>prevention of these cases. | No | n/a | Portugal | elderly | physical, neglect | not identified |
|---------------------------------------------------------------------------|------|------------------------------------------------------------------------|--------------------------------------------------------------------------------------------------------------------------------------------------------------------------------------------------------------------------------|----|-----|----------|---------|-------------------|----------------|

|                                                                                                           |      |                                                                                    |                                                                                                                                                                                                                                                                                                                                                            |     |                    |          |                         |                           |                |
|-----------------------------------------------------------------------------------------------------------|------|------------------------------------------------------------------------------------|------------------------------------------------------------------------------------------------------------------------------------------------------------------------------------------------------------------------------------------------------------------------------------------------------------------------------------------------------------|-----|--------------------|----------|-------------------------|---------------------------|----------------|
| Gil, Ana Paula                                                                                            | 2019 | Quality procedures and complaints: nursing homes in Portugal                       | analyse how mistreatment of older people is identified and dealt with by the national social security services. In particular it looks at what the indicators are with which to assess poor quality care and mistreatment (how it is perceived and defined), which factors affect mistreatment of older people and intervention outputs (i.e. what are the | no  | n/a                | Portugal | elderly population      | physical and verbal abuse | not identified |
| Hassouneh-Phillips, D. and McNeff, E. and Powers, L. and Curry, M. A.                                     | 2005 | Invalidation: a central process underlying maltreatment of women with disabilities | understand factors underlying mistreatment of women with disabilities by healthcare staff                                                                                                                                                                                                                                                                  | No  | n/a                | US       | women with disabilities | Physical                  | not identified |
| Hyde, Paula and Burns, Diane and Killest, Anne and Kenkmann, Andrea and Pol and , Fiona and Gray, Richard | 2014 | Organisational aspects of elder mistreatment in long term care                     | examined the organisational factors associated with abuse, neglect and/or loss of dignity of older people resident in care homes.                                                                                                                                                                                                                          | yes | evidence synthesis |          | elderly population      | abuse generally mentioned | not identified |

|                                                                                                                                                                                                  |      |                                                                                                                                      |                                                                                                                                                                                                                                                                                                           |     |           |         |                                      |                                           |                |
|--------------------------------------------------------------------------------------------------------------------------------------------------------------------------------------------------|------|--------------------------------------------------------------------------------------------------------------------------------------|-----------------------------------------------------------------------------------------------------------------------------------------------------------------------------------------------------------------------------------------------------------------------------------------------------------|-----|-----------|---------|--------------------------------------|-------------------------------------------|----------------|
| Lim, J.                                                                                                                                                                                          | 2020 | Factors Affecting Mistreatment of the Elderly in Long-Term Care Facilities                                                           | explore the factors affecting elderly mistreatment by care workers in Japaneselong-term care facilities and to examine the relationship between these factors and mistreatment.                                                                                                                           | no  | n/a       | Japan   | elderly population                   | just mistreatment mentioned, not specific | not identified |
| Mercier, E. and Nadeau, A. and Brousseau, A. A. and Emond, M. and Lowthian, J. and Berthelot, S. and Costa, A. P. and Mowbray, F. and Melady, D. and Yadav, K. and Nickel, C. and Cameron, P. A. | 2020 | Elder Abuse in the Out-of-Hospital and Emergency Department Settings: A Scoping Review                                               | synthesize the available evidence on the epidemiology, patient- and caregiver-associated factors, clinicalcharacteristics, screening tools, prevention, interventions, and perspectives of health care professionals in regard to elder abuse inthe out-of-hospital or emergency department (ED) setting. | Yes | scoping   | various | elderly population in emergency care | physical                                  | not identified |
| Moore, Steve                                                                                                                                                                                     | 2019 | The relativity of theory: applying theories of social psychology to illuminate the causes of the abuse of older people in care homes | the purpose of this paper is to explain the evident continuing abuse of adults at risk living in care homes by the staff who should be looking after them.                                                                                                                                                | Yes | narrative | n/a     | elderly population                   | abuse generally mentioned                 | not identified |
| Natan, M. B. and Lowenstein, A.                                                                                                                                                                  | 2010 | Feature. Study of factors that affect abuse of older people in nursing homes                                                         | to examination the effects of long-term care facility traits on the maltreatment of older people                                                                                                                                                                                                          | No  | n/a       | Isarel  | elderly population                   | physical                                  | not identified |

|                                                    |      |                                                                                           |                                                                                                                                                                                                                 |     |           |        |                    |                                                              |                |
|----------------------------------------------------|------|-------------------------------------------------------------------------------------------|-----------------------------------------------------------------------------------------------------------------------------------------------------------------------------------------------------------------|-----|-----------|--------|--------------------|--------------------------------------------------------------|----------------|
| Natan, M. B. and Lowenstein, A. and Eisikovits, Z. | 2010 | Psycho-social factors affecting elders' maltreatment in long-term care facilities         | To examine and analyse major variables affecting maltreatment of elderly nursing home residents.                                                                                                                | No  | n/a       | Isarel | elderly population | maltreatment generally (including physical and verbal abuse) | not identified |
| Phillips, L. R. and Guo, G.                        | 2011 | Mistreatment in assisted living facilities: complaints, substantiations, and risk factors | explore relationships among selected institutional and resident risk and situation-specific factors and complaints and substantiated allegations of various types of mistreatment in assisted living facilities | No  | n/a       | US     | elderly population | Physical, verbal and physical restraint                      | not identified |
| Pillemer, K.                                       | 1988 | Maltreatment of patients in nursing homes: overview and research agenda                   | critical review of the social science literature regarding maltreatment of patients in nursing homes.                                                                                                           | Yes | narrative |        | elderly population | mistreatment generally                                       | not identified |
| Pillemer, K. and Moore, D. W.                      | 1990 | HIGHLIGHTS FROM A STUDY OF ABUSE OF PATIENTS IN NURSING HOMES                             | to shed light on the situations in which staff act towards patients in a way that can cause them additional suffering                                                                                           | no  | n/a       | US     | elderly population | physical, physical restraint (excessive)                     | not identified |



|                                                                                                                                                                 |      |                                                                                                                                   |                                                                                                                                                                                                                          |     |                                       |        |                    |                                              |                |
|-----------------------------------------------------------------------------------------------------------------------------------------------------------------|------|-----------------------------------------------------------------------------------------------------------------------------------|--------------------------------------------------------------------------------------------------------------------------------------------------------------------------------------------------------------------------|-----|---------------------------------------|--------|--------------------|----------------------------------------------|----------------|
| Pillemer, Karl and Bachman-Prehn, Ronet                                                                                                                         | 1991 | Helping and hurting                                                                                                               | identify factors underlying mistreatment of elderly patients                                                                                                                                                             | No  | n/a                                   | US     | elderly            | physical, physical restraint (excessive use) | not identified |
| Saveman, B. and Astrom, S. and Bucht, G. and Norberg, A.                                                                                                        | 1999 | Elder abuse in residential settings in Sweden                                                                                     | To investigate frequencies and types of elder abuse occurring in residential settings in two municipal areas of Sweden                                                                                                   | no  | n/a                                   | Sweden | elderly population | physical                                     | not identified |
| Schiemberg, L. B. and Oehmke, J. and Zhang, Z. and Barboza, G. E. and Griffore, R. J. and Von Heydrich, L. and Post, L. A. and Weatherill, R. P. and Mastin, T. | 2012 | Physical abuse of older adults in nursing homes: a random sample survey of adults with an elderly family member in a nursing home | to estimate prevalence of physical abuse in nursing homes and to identify individual and social/contextual risk factors of physical abuse                                                                                | No  | n/a                                   | USA    | Elderly care       | Physical and neglect                         | not identified |
| Silverman, B. C. and Stern, T. W. and Gross, A. F. and Rosenstein, D. L. and Stern, T. A.                                                                       | 1996 | Lewd, crude, and rude behavior: the impact of manners and etiquette in the general hospital                                       | to understand the impact of lewd, crude, and rude behaviors in the general hospital and to provide a context in which to educate clinicians about the management of troublesome behaviors of patients and staff members. | Yes | Historical - with no detailed methods | n/a    | Healthcare         | Verbal                                       | not identified |

|                                                                          |      |                                                                                                          |                                                                                                                                                                              |     |           |     |                    |                        |                |
|--------------------------------------------------------------------------|------|----------------------------------------------------------------------------------------------------------|------------------------------------------------------------------------------------------------------------------------------------------------------------------------------|-----|-----------|-----|--------------------|------------------------|----------------|
| Stevens, M. and Biggs, S. and Dixon, J. and Tinker, A. and Manthorpe, J. | 2013 | Interactional perspectives on the mistreatment of older and vulnerable people in long-term care settings | developing theoretical and methodological understanding of the abuse and neglect (mistreatment) of older people in long-term care settings such as care homes and hospitals. | yes | narrative | n/a | elderly population | mistreatment generally | interactionist |
|--------------------------------------------------------------------------|------|----------------------------------------------------------------------------------------------------------|------------------------------------------------------------------------------------------------------------------------------------------------------------------------------|-----|-----------|-----|--------------------|------------------------|----------------|

| Study design (grounded theory/phenomenology/qualitative exploratory, etc) | Participant characteristics - staff/professionals (age, profession, | Participant characteristics - patients/service-users (age, ethnicity, etc)  | Data collection methods    | Apriori theory used to analyse/frame the data? | Key findings/ Themes                                                                                                                                                                                                                                                                                                                                                                                                                                                                                                                                                                                                                                                                                                                                                                                                                                                                                                                                                                                                                                                                                                                                                                                                 | Explicit theories used to interpret findings (includes reference/clearly defined) | Theories/ideologies implicit by authors (but not references/explicity named) | Other interpretations used to explain the findings                                                                                                                                                                                                                                                                                      |
|---------------------------------------------------------------------------|---------------------------------------------------------------------|-----------------------------------------------------------------------------|----------------------------|------------------------------------------------|----------------------------------------------------------------------------------------------------------------------------------------------------------------------------------------------------------------------------------------------------------------------------------------------------------------------------------------------------------------------------------------------------------------------------------------------------------------------------------------------------------------------------------------------------------------------------------------------------------------------------------------------------------------------------------------------------------------------------------------------------------------------------------------------------------------------------------------------------------------------------------------------------------------------------------------------------------------------------------------------------------------------------------------------------------------------------------------------------------------------------------------------------------------------------------------------------------------------|-----------------------------------------------------------------------------------|------------------------------------------------------------------------------|-----------------------------------------------------------------------------------------------------------------------------------------------------------------------------------------------------------------------------------------------------------------------------------------------------------------------------------------|
| qualitative descriptive design                                            | 40                                                                  | 35 patients (see Table 1) - 18 males and 17 females                         | Semi-structured interviews | not identified                                 | Three categories were important for both nurses and patients: negligence, impoliteness and dismissal. Descriptions of the behaviours were comparable for both groups. The fourth category, inattentiveness, was highlighted by nurses, while the fifth category, discrimination, was highlighted by patients.                                                                                                                                                                                                                                                                                                                                                                                                                                                                                                                                                                                                                                                                                                                                                                                                                                                                                                        | Not identified                                                                    | not identified                                                               | Differences in social roles and responsibilities.                                                                                                                                                                                                                                                                                       |
| Quantitative/prevalence based study                                       | n/a                                                                 | 1,324 Jewish and Arab adolescents (ages 11–19) residing in residential care | Self-report questionnaire  | not identified                                 | 24.7% of adolescents report being victims of at least one act of physical maltreatment - 29.1% report at least one act of verbal maltreatment. 29.6% of boys experienced at least one physical maltreatment v's 19.2% of girls (statistically significant); 32.9% of girls experienced at least one verbal maltreatment compared to 26.1% of boys. adolescents who perceive the RCS's staff to be more supportive, or to be less strict, are estimated to report less of each form of maltreatment by staff. Perception of the centre's policy on violence is negatively associated with maltreatment - adolescents with higher scores on the policy index (indicating level of agreement that the residential care setting on violence is clear, fair, and consistent) are estimated to report lower levels of both physical and verbal maltreatment by staff. Perception of the level of support and strictness found to be associated with both forms of maltreatment. In regression model, individual level factors (age, ethnicity, hyperactivity, etc) explain most variance in adolescents' reports of staff physical maltreatment physical maltreatment; Results also indicate that the largest share of the | Not identified                                                                    | not identified                                                               | Gender (i.e. boys more aggressive); staff feel physical intimidation will be more effective with boys than girls; caregivers lack of understanding; lack of training; association between maltreatment and the use of authoritarian discipline methods; patriarchal and authoritarian family values, cultural and socioeconomic issues; |

|                   |                                                  |                                                                                    |     |                |                                                                                                                                                                                                                                                                                                                                                                                                                                                                                                                                                                                                                                                                                        |                |                     |                        |
|-------------------|--------------------------------------------------|------------------------------------------------------------------------------------|-----|----------------|----------------------------------------------------------------------------------------------------------------------------------------------------------------------------------------------------------------------------------------------------------------------------------------------------------------------------------------------------------------------------------------------------------------------------------------------------------------------------------------------------------------------------------------------------------------------------------------------------------------------------------------------------------------------------------------|----------------|---------------------|------------------------|
| Systematic review | 14/30 studies conducted with health care workers | 16/30 studies undertaken with sexual and gender minority (SGM) individuals - LGBTQ | n/a | not identified | Between 2% and 41.8% experience discriminatory behavior - often related to refusal of needed medication due to sexual orientation and gender; studies. Sexual minority men had more negative experiences of discrimination than the other SGM subgroups; Prevalence of disclosure to health care staff in SGM individuals varied from 17% to 75% (due to fear of stigmatization/negative implications of disclosures, e.g. mental health referrals. Gender, religion, occupation, knowledge level, sexual orientation, and education level of healthcare staff were associated with negative attitudes about SGM people. Having an SGM relative was linked to positive attitudes about | Not identified | Homophobia; stigma; | Socio-cultural beliefs |
|-------------------|--------------------------------------------------|------------------------------------------------------------------------------------|-----|----------------|----------------------------------------------------------------------------------------------------------------------------------------------------------------------------------------------------------------------------------------------------------------------------------------------------------------------------------------------------------------------------------------------------------------------------------------------------------------------------------------------------------------------------------------------------------------------------------------------------------------------------------------------------------------------------------------|----------------|---------------------|------------------------|

|                         |                       |     |              |                        |                                                                                                                                                                                                                                                                                                                                                                                                                                                                                                                                                                                                                                                                                                                                                                                                                |                                                                                                                                                                          |                |                                                                                                                                                                                                                                                                                                                                                                                                                                                                                                                                                                                                          |
|-------------------------|-----------------------|-----|--------------|------------------------|----------------------------------------------------------------------------------------------------------------------------------------------------------------------------------------------------------------------------------------------------------------------------------------------------------------------------------------------------------------------------------------------------------------------------------------------------------------------------------------------------------------------------------------------------------------------------------------------------------------------------------------------------------------------------------------------------------------------------------------------------------------------------------------------------------------|--------------------------------------------------------------------------------------------------------------------------------------------------------------------------|----------------|----------------------------------------------------------------------------------------------------------------------------------------------------------------------------------------------------------------------------------------------------------------------------------------------------------------------------------------------------------------------------------------------------------------------------------------------------------------------------------------------------------------------------------------------------------------------------------------------------------|
| review                  | n/a                   | n/a | n/a          | ecological perspective | There is inadequate trustworthy evidence to assess the effects of elder abuse interventions on occurrence or recurrence of abuse, although there is some evidence to suggest it may change the combined measure of anxiety and depression of caregivers. There is a need for high-quality trials, including from low- or middle-income countries, with adequate statistical power and appropriate study characteristics to determine whether specific intervention programmes, and which components of these programmes, are effective in preventing or reducing abuse episodes among the elderly. It is uncertain whether the use of educational interventions improves knowledge and attitude of caregivers, and whether such programmes also reduce occurrence of abuse, thus future research is warranted. | result of complex interactions among factors at the individual, relationship, community and societal levels, which can be conceptualised using an ecological perspective | not identified | individual factors - patient vulnerability - disabilities and chronic health problems that result in increased dependence on caregivers are particularly at risk of elder maltreatment. low social support, loneliness, social isolation and lack of social networks among the elderly further perpetuate maltreatment. Perpetrators' mental illness, high levels of hostility, substance abuse, psychological distress and their dependence on the victim for accommodation and financial support appear to be strong risk factors that predispose elderly to maltreatment. <u>Women were generally</u> |
| qualitative exploratory | 14 nursing home staff | n/a | focus groups | not identified         | several factors contribute to the prevention of physical abuse of residents in nursing homes. There is a requirement for increased competence among staff about the concept of abuse and known risk factors. Good communication skills and trusting relationships are important factors, as well as a culture that fosters openness where ethical dilemmas can                                                                                                                                                                                                                                                                                                                                                                                                                                                 | Not identified                                                                                                                                                           | not identified | difficulties in defining abuse and knowing when crossed a boundary                                                                                                                                                                                                                                                                                                                                                                                                                                                                                                                                       |

|                                                                |                                                                                 |                                                                                                      |                                                        |                                   |                                                                                                                                                                                                                                                                                                                                                                                                                                                                                                                                                                                                                                                                                                                            |                                                                                                                                |                                                       |                                                                                                                                                                                                                                                                                                                                                                 |
|----------------------------------------------------------------|---------------------------------------------------------------------------------|------------------------------------------------------------------------------------------------------|--------------------------------------------------------|-----------------------------------|----------------------------------------------------------------------------------------------------------------------------------------------------------------------------------------------------------------------------------------------------------------------------------------------------------------------------------------------------------------------------------------------------------------------------------------------------------------------------------------------------------------------------------------------------------------------------------------------------------------------------------------------------------------------------------------------------------------------------|--------------------------------------------------------------------------------------------------------------------------------|-------------------------------------------------------|-----------------------------------------------------------------------------------------------------------------------------------------------------------------------------------------------------------------------------------------------------------------------------------------------------------------------------------------------------------------|
| development of training                                        | 35 people working in nursing homes, 5 administrators, 4 social                  | n/a                                                                                                  | interviews                                             | not identified                    | participants gave the training high ratings and demonstrated a significant increase in job satisfaction pre to post training.                                                                                                                                                                                                                                                                                                                                                                                                                                                                                                                                                                                              | Not identified                                                                                                                 | poor working conditions, lack of knowledge/strategies | working conditions (short staffing) and lack of knowledge about dealing with conflicts and difficulties                                                                                                                                                                                                                                                         |
| qualitative phenomenological method                            | 26 employees from four residential homes, 2 managers outside these institutions | 20 elderly residents from the 4 residential homes                                                    | interviews                                             | not identified                    | Established forms of elder abuse were summarized as rights violation, financial abuse, psychological abuse, physical abuse and neglect. Causes of elder abuse included institution, employee and client characteristics.                                                                                                                                                                                                                                                                                                                                                                                                                                                                                                   | Not identified                                                                                                                 | not identified                                        | institutional characteristics (poor organisation, reprimands, staff shortages), employee characteristics (burnout, personal problems, inadequate                                                                                                                                                                                                                |
| case study of an inquiry into community residential home abuse |                                                                                 | minority ethnic people, one male one female, severe learning difficulties and challenging behaviours | Not applicable: secondary analysis of a public inquiry | See under theoretical perspective | Components of a culture of abuse: isolation of the specific service from the overall organisation ('corruption of care'); ineffective staff supervision (and failure to discipline a powerful lead perpetrator); Intimidation (by the powerful perpetrator and their 'in' colleagues); institutionalisation (of violence); inexperience (and powerlessness of new staff to challenge); anti-professionalism (explicit flouting of guidelines). Barriers to disclosure at multiple levels. Poor support for whistle blowers. Deficiencies in Service Audit. Poor interprofessional communication. Poor recognition skills. Lack of clarity in case management. Deficiencies in market management and service specification. | Prior cited theories all implied in the analysis and discussion: Goffman and Foucault are cited in the thematic interpretation | not identified                                        | Author states: 'The abuse of people with learning difficulties... will never be eradicated in a society which institutionalises human and other capital in services and where dependency relationships themselves become a means of economic production. The professionalisation of care also risks hierarchies of power and status which provide opportunities |

|                                  |                                          |                                                                 |               |                                                                                                                         |                                                                                                                                                                                                                                                                                                                                                                                                                                                                                                     |                |                                                                                                                                                         |                                                                                                                                                                                                                      |
|----------------------------------|------------------------------------------|-----------------------------------------------------------------|---------------|-------------------------------------------------------------------------------------------------------------------------|-----------------------------------------------------------------------------------------------------------------------------------------------------------------------------------------------------------------------------------------------------------------------------------------------------------------------------------------------------------------------------------------------------------------------------------------------------------------------------------------------------|----------------|---------------------------------------------------------------------------------------------------------------------------------------------------------|----------------------------------------------------------------------------------------------------------------------------------------------------------------------------------------------------------------------|
| structured review                | n/a                                      | n/a                                                             | n/a           | Broadly (notions of institutional discrimination and power differentials between providers and service users are in the | Discrimination in the health care setting as a public health issue; Health outcomes and discrimination in health facilities; Reducing discrimination in health care                                                                                                                                                                                                                                                                                                                                 | Not identified | Discrimination at the structural and societal level, and gender discrimination, as well as discrimination at the provider level, are all discussed      | Authors hypothesise that only interventions that operate at all these levels are likely to be successful to reduce discrimination and subsequent abuse                                                               |
| Qualitative descriptive          | n/a                                      | Both male and female participants - no other demographics given | Focus groups  | broadly: notions of discrimination on the grounds of ethnicity, poverty, language, labelling of                         | three themes: Theme 1: Discrimination in access to care; Theme 2: Abusive treatment in care; Theme 3; neglect of professional ethics                                                                                                                                                                                                                                                                                                                                                                | Not identified | not identified                                                                                                                                          | Discrimination' and power differentials discussed but not linked to any more explicit theories                                                                                                                       |
| Quantitative observational study | n/a                                      | 769 of the persons in long-term care were aged 65 or older.     | Postal survey | None (though hypotheses are stated linking different factors to the hypothesised impact on experience of abuse)         | A good fit is claimed for the model, but the relationships it illustrates (between physical impairment, cognitive impairment, behavioural problems, age and abuse) are not straightforward                                                                                                                                                                                                                                                                                                          | Not identified | ? A deficit model - that the more physically impaired and behaviourally challenging an elderly person is the more likely they are to stress carers, and | not identified                                                                                                                                                                                                       |
| development of questionnaire     | 36 care workers from 4 London care homes | n/a                                                             | focus groups  | not identified                                                                                                          | situations with potentially abusive consequences were a common occurrence, but deliberate abuse was rare. Residents waited too long for personal care, or were denied care they needed to ensure they had enough to eat, were moved safely, or were not emotionally neglected. Some care workers acted in potentially abusive ways because they did not know of a better strategy or understand the resident's illness; care workers made threats to coerce residents to accept care, or restrained | Not identified | not identified                                                                                                                                          | institutional factors (Bureaucracy, lack of information about residents), care worker conditions (disempowerment, lacking training and knowledge, ignoring residents personal needs to avoid work), resident factors |

|                               |                                              |     |               |                |                                                                                                                                                                                                                                                 |                |                |                                                                                                                                                                                          |
|-------------------------------|----------------------------------------------|-----|---------------|----------------|-------------------------------------------------------------------------------------------------------------------------------------------------------------------------------------------------------------------------------------------------|----------------|----------------|------------------------------------------------------------------------------------------------------------------------------------------------------------------------------------------|
| review                        | n/a                                          | n/a | n/a           | not identified | elderly abuse in nursing homes is still underreported in both original articles and reviews. Despite the aging of the population, elderly abuse and neglect still remain hidden problems, overlooked and also underestimated in the literature. | Not identified | not identified | incidence of elder abuse in health centers is usually proportional to the number of institutionalized patients from home to long-term care hospitals and nursing homes, with, therefore, |
| cross sectional questionnaire | 202 psychiatric nurses from five psychiatric |     | questionnaire | not identified | nurses needed additional education in psychiatric ethics. Insufficient personnel, excessive workload, working conditions, lack of supervision, and in-service training were identified as leading to unethical behaviors.                       | Not identified | not identified | Insufficient personnel, excessive workload, working conditions, lack of supervision, and in-                                                                                             |



|                      |     |                                                                                                                                                                                                                                                                                                                                                                                                                                                                  |                  |                |                                                                                                                                                                                                                                                                                                                    |                                                                                                                                                                                                                                                                                                                                           |                |                                                           |
|----------------------|-----|------------------------------------------------------------------------------------------------------------------------------------------------------------------------------------------------------------------------------------------------------------------------------------------------------------------------------------------------------------------------------------------------------------------------------------------------------------------|------------------|----------------|--------------------------------------------------------------------------------------------------------------------------------------------------------------------------------------------------------------------------------------------------------------------------------------------------------------------|-------------------------------------------------------------------------------------------------------------------------------------------------------------------------------------------------------------------------------------------------------------------------------------------------------------------------------------------|----------------|-----------------------------------------------------------|
| Review of case notes | n/a | Most alleged victims were female (n¼47, 79.7%), 75 years or older (n¼41, 75.9%), with a mean age of 79.7 (Min¼66,Max¼107), all retired and mostly without a partner (51.5%widowed or divorced and 39.4% single). The majority presented some degree of disability: mild/moderate (n¼22, 37.3%) or severe(n¼33, 55.9%). Twenty-six victims (47.2%) were unable to communicate and 1 (1.8%) experienced difficulties in doing so, just being able to answer simple | Logging of cases | not identified | A llegation of physical abuse appeared isolated in 93.2% of the cases (n¼55) and associated with neglect in 3.4% (n¼3). The main recognised mechanism of aggression was grasping (n¼10, 83.3%) and, in 2 cases, multiple mechanisms were mentioned (pushing and punching; slapping and aggression with a scissors) | Due to the interaction among factors of the individual, relationship, community and societal levels, the ecological model is useful for considering risks and understanding the types of programmes that need to be implemented at different levels (Schiamberg et al. (2011):: (micro, meso, macro system factors noted by the authors ) | not identified | Largely clinical and descriptive rather than interpretive |
|----------------------|-----|------------------------------------------------------------------------------------------------------------------------------------------------------------------------------------------------------------------------------------------------------------------------------------------------------------------------------------------------------------------------------------------------------------------------------------------------------------------|------------------|----------------|--------------------------------------------------------------------------------------------------------------------------------------------------------------------------------------------------------------------------------------------------------------------------------------------------------------------|-------------------------------------------------------------------------------------------------------------------------------------------------------------------------------------------------------------------------------------------------------------------------------------------------------------------------------------------|----------------|-----------------------------------------------------------|

|                         |                                                                                     |                      |                                                                                                         |                             |                                                                                                                                                                                                                                                                                                                                                                                                                                                                                      |                               |                                                  |                                                                                                                                                                                                                                                                                                                         |
|-------------------------|-------------------------------------------------------------------------------------|----------------------|---------------------------------------------------------------------------------------------------------|-----------------------------|--------------------------------------------------------------------------------------------------------------------------------------------------------------------------------------------------------------------------------------------------------------------------------------------------------------------------------------------------------------------------------------------------------------------------------------------------------------------------------------|-------------------------------|--------------------------------------------------|-------------------------------------------------------------------------------------------------------------------------------------------------------------------------------------------------------------------------------------------------------------------------------------------------------------------------|
| qualitative exploratory | focus groups were carried out with inspectors from the National Inspection Service. | n/a                  | mixed method, using a database of 3,685 complaints reported to the social security inspection services. | not identified              | Some indicators were found in key areas of care and the factors associated with this were based on Kamavarapu's typology (2017): physical conditions of facilities; closed organisational models; difficult working conditions; and perceived concerns of residents. Monitoring and inspection systems are still based on minimum standards focusing on structural and process quality, devoting little attention to the human rights situation of older persons and clinical issues | Not identified                | not identified                                   | physical conditions of facilities; closed organisational models; difficult working conditions; and perceived concerns of residents.                                                                                                                                                                                     |
| qualitative exploratory | not mentioned                                                                       | not mentioned        | secondary analysis of data derived from three qualitative studies of abuse of women with                | Medical model of disability | Invalidation was found to underlie maltreatment. Invalidation was characterized by health care providers Taking Overcare, Discounting, Objectifying, and Hurting women with disabilities during health care encounters.                                                                                                                                                                                                                                                              | Medical model of disability   | not identified                                   | not identified                                                                                                                                                                                                                                                                                                          |
| evidence synthesis      | care staff and managers of residential care homes                                   | residents, relatives | review, documentary analysis (investigation reports of abuse) and panel meetings                        | socioecological model       | five organisational factors associated with elder mistreatment; infrastructure, management and procedures, staffing, resident population characteristics and culture. It also indicates macro-structural factors affecting care quality. Investigation reports recognised common structural factors contributing to institutional abuse, however, as 'problem' organisations are closed down these circumstances recur elsewhere.                                                    | socioecological model, stress | institutional infrastructure, workload pressures | five organisational factors associated with elder mistreatment; infrastructure, management and procedures, staffing, resident population characteristics and culture; commonly-identified problems including an increase in the number of high dependency residents, lack of capability of staff, poor staffing levels, |

|                               |                                                               |     |               |                                                                                                                                     |                                                                                                                                                                                                                                                                                                                                                                                                                                                                                   |                                                                                                                                                                         |                       |                                                                                                                                                                                                                       |
|-------------------------------|---------------------------------------------------------------|-----|---------------|-------------------------------------------------------------------------------------------------------------------------------------|-----------------------------------------------------------------------------------------------------------------------------------------------------------------------------------------------------------------------------------------------------------------------------------------------------------------------------------------------------------------------------------------------------------------------------------------------------------------------------------|-------------------------------------------------------------------------------------------------------------------------------------------------------------------------|-----------------------|-----------------------------------------------------------------------------------------------------------------------------------------------------------------------------------------------------------------------|
| cross sectional questionnaire | 1473 care workers from long-term care facilities              | n/a | survey        | Schiarnberg's ecological model - risk factors for mistreatment in nursing homes include patient traits, staff traits, institutional | nursing care level, work period, resilience, and attitude towards mistreatment among residents and staff were factors significantly associated with the degree of mistreatment. Facility size, an institutional environment that does not limit the behavior of residents, and family and community support for the elderly were among the institutional environment factors that had significant relationships with mistreatment. Staff gender, care-related                     | Schiarnberg's ecological model - risk factors for mistreatment in nursing homes include patient traits, staff traits, institutional environments, and societal factors. | stress and resilience | nursing care level, staff work period, resilience, attitude towards mistreatment, facility size, autonomy at work, institutional care environment that does not limit the behavior of residents,                      |
| scoping review                | n/a                                                           | n/a | n/a           | not identified                                                                                                                      | prevalence of elder abuse reported during the ED visit was lower than reported in the community. The most commonly detected type of elder abuse was neglect, and then physical abuse. The following factors were more common in identified cases of elder abuse: female sex, cognitive impairment, functional disability, frailty, social isolation, and lower socioeconomic status. Psychiatric and substance use disorders were more common among victims and their caregivers. | Not identified                                                                                                                                                          | not identified        | patient characteristics: abuse more common in females, those with a higher frailty score, a lower level of education, and psychiatric and drug or alcohol abuse disorders, cognitive impairment and dementia, problem |
| review                        | n/a                                                           | n/a | n/a           | a range of social psychology theories/models                                                                                        |                                                                                                                                                                                                                                                                                                                                                                                                                                                                                   | discusses a range of social psychology theory and explores findings using a socioecological framework, proposing that Henri Tajfel's theory on the social psychology of | not identified        | not identified                                                                                                                                                                                                        |
| cross sectional questionnaire | staff working at 24 of the 300 long-term facilities for older | n/a | questionnaire | not identified                                                                                                                      | Slightly more than half of the sample reported abuse of older residents in the previous 12 months, manifesting in one or more types of maltreatment. High staff turnover was associated with a greater risk of mental or                                                                                                                                                                                                                                                          | Not identified                                                                                                                                                          | not identified        | size of the facility, high staff turn over, high staff to patient ratio (this is correct!!)                                                                                                                           |

|                               |                                        |     |                                                                                                       |                                                                                                                                                                                          |                                                                                                                                                                                                                                                                                                                                                                                                                                                                                                                                                                                |                                                                                                                                                                                                                                                                   |                |                                                                                                                                                                                                                                                                                                         |
|-------------------------------|----------------------------------------|-----|-------------------------------------------------------------------------------------------------------|------------------------------------------------------------------------------------------------------------------------------------------------------------------------------------------|--------------------------------------------------------------------------------------------------------------------------------------------------------------------------------------------------------------------------------------------------------------------------------------------------------------------------------------------------------------------------------------------------------------------------------------------------------------------------------------------------------------------------------------------------------------------------------|-------------------------------------------------------------------------------------------------------------------------------------------------------------------------------------------------------------------------------------------------------------------|----------------|---------------------------------------------------------------------------------------------------------------------------------------------------------------------------------------------------------------------------------------------------------------------------------------------------------|
| cross sectional questionnaire | 510 staff working in 22 nursing homes  | n/a | questionnaire                                                                                         | the theoretical model for predicting causes of maltreatment of elderly residents developed by Pillemer (1988) - involving the work environment at the facility, patient traits and staff | Slightly more than half of the staff sampled reported abuse of elderly residents over the past year, as manifested in one or more of types of maltreatment. The total number of various types of maltreatment reported was 513. About two-thirds of the cases were incidents of neglect. Seventy per cent of respondents reported that they had been present at incidents in which another staff member abused an elderly resident in one or more types of maltreatment, and in such situations mental abuse and mental neglect were the most prevalent forms of maltreatment. | the theoretical model for predicting causes of maltreatment of elderly residents developed by Pillemer (1988) - involving the work environment at the facility, patient traits and staff traits, and the Theory of Reasoned Action developed by Ajzen & Fishbein. | burnout        | elder maltreatment is a result of demographic characteristics, staff training features and patient traits affected by the organization's work environment (the facility). women have a high risk of experiencing physical violence, correlation between the number of beds, number of nurses, number of |
| secondary data analysis       | n/a                                    | n/a | examination of archived public data of complaints and allegations of abuse in assisted living centres | not identified                                                                                                                                                                           | The complaint group was comprised of significantly more assisted living centers, large facilities (51–101+), facilities licensed to provide personal care services, and facilities owned by national corporations.                                                                                                                                                                                                                                                                                                                                                             | Not identified                                                                                                                                                                                                                                                    | not identified | size of facility, lack of training, Physical abuse is closely aligned to the power and control issues inherent in other types of                                                                                                                                                                        |
| review                        | n/a                                    | n/a | n/a                                                                                                   | sociological theory                                                                                                                                                                      |                                                                                                                                                                                                                                                                                                                                                                                                                                                                                                                                                                                | proposes a theoretical model involving interactions between nursing home environment and patient and staffing characteristics and exogenous factors impacting on elder mistreatment                                                                               | not identified | exogenous factors - supply of nursing home beds (e.g. bed shortage) and unemployment rates, nursing home environment - custodial care, size of facility, level of care, rates of care, cost of patient care, staff-patient ratio, staff turnover. Staff                                                 |
| qualitative exploratory       | 57 nursing homes (survey) - 577 nurses | n/a | focus groups and survey                                                                               | not identified                                                                                                                                                                           |                                                                                                                                                                                                                                                                                                                                                                                                                                                                                                                                                                                | Not identified                                                                                                                                                                                                                                                    | not identified | staff to patient conflict, burnout, younger staff and staff with negative                                                                                                                                                                                                                               |

|                                                      |                             |                                                                                                                                                                                            |                                   |                                                                                                                                                               |                                                                                                                                                                                                                                                                                                                                       |                |                                                                                                                                                                                               |                                                                                                                                                                                                               |
|------------------------------------------------------|-----------------------------|--------------------------------------------------------------------------------------------------------------------------------------------------------------------------------------------|-----------------------------------|---------------------------------------------------------------------------------------------------------------------------------------------------------------|---------------------------------------------------------------------------------------------------------------------------------------------------------------------------------------------------------------------------------------------------------------------------------------------------------------------------------------|----------------|-----------------------------------------------------------------------------------------------------------------------------------------------------------------------------------------------|---------------------------------------------------------------------------------------------------------------------------------------------------------------------------------------------------------------|
| cross sectional questionnaire                        | 577 nurses and nursing aids | not mentioned                                                                                                                                                                              | survey                            | not identified                                                                                                                                                | three sets of variables were predicted to have physical and psychological abuse - situational, participant and insititutional characteristics - logistic regression revealead that situational characteristics were best predictors of maltreatment, specifically burnout and high                                                    | Not identified | situational charactersitics                                                                                                                                                                   | burnout, high staff-patient conflict                                                                                                                                                                          |
| cross sectional questionnaire                        | 499 residential staff       | n/a                                                                                                                                                                                        | questionnaire                     | not identified                                                                                                                                                | In the specific situations reported, the abusers weremostly characterised as hot-tempered, exhausted, and burned out. Theabused people were often mentallyand/or physically handicapped andgenerally over 80 years old. Feelings such as powerlessness, anger to-wards the abuser, and compassion for the abused person were reported | Not identified | Feelings of powerlessness and inadequacy                                                                                                                                                      | abusers were most commonly men, aggressive and easilylost their temper, exhausted and burned out, and/or dominant and egoistic. abused persons weremost commonly women had more than one handicap/disability, |
| Survey                                               | No staff were included      | Relatives completed the survey about older family members (>65 years old) in care homes. 452 responses - resident details = 73% female; 91% white; 86% high school or less; 87% married or | Survey                            | Limited - structured around the potential factors that might increasse the likelihood of mistreatment, e.g. gender, age, institutional environment, degree of | Limitations in activities of daily living (ADLs), older adult behavioral difficulties, and previous victimization by nonstaff perpetrators were associated with a greater likelihood of physical abuse.                                                                                                                               | Not identified | Mainly focuses on factors associated with mistreatment and the relationship with caregivers...includi ng the nature of wider (distal) relationships between caregivers and elderly relatives. | not identified                                                                                                                                                                                                |
| States historical but reads more of an opinion piece | n/a                         | n/a                                                                                                                                                                                        | No details on how data collection | not identified                                                                                                                                                | Details a range of reasons for lewd/crude behaviour in physician-patient and physician-other interactions - lot of focus in on ethics, values, etiquette (including dress and language) rather than verbal abuse per se                                                                                                               | Not identified | biopsychosocial context                                                                                                                                                                       | Lack of respect (for patients), patient intimidation, disordered brain functions/affective dysregulation                                                                                                      |

|        |     |     |     |                                                                                                                                                                                                     |                                                                                                                                                                                                                                                                                                                                                                                                                                                                                                                                                                                                                                                                                                   |                |                |                                                                                                                                                                                                                                                          |
|--------|-----|-----|-----|-----------------------------------------------------------------------------------------------------------------------------------------------------------------------------------------------------|---------------------------------------------------------------------------------------------------------------------------------------------------------------------------------------------------------------------------------------------------------------------------------------------------------------------------------------------------------------------------------------------------------------------------------------------------------------------------------------------------------------------------------------------------------------------------------------------------------------------------------------------------------------------------------------------------|----------------|----------------|----------------------------------------------------------------------------------------------------------------------------------------------------------------------------------------------------------------------------------------------------------|
| review | n/a | n/a | n/a | positioning theory analysis - interactions are based on taking of 'positions', clusters of rights and duties to act in certain ways and impose particular meanings, which enable or prohibit access | The central argument of the article is that patterns of micro-interactions, particularly positioning older people with care needs as less able, less worthy of interaction and not complete people can lead to and form part of loss of dignity and give rise to risks of mistreatment. Such common patterns of positioning and interpretations of language, create and reproduce organizational culture and societal factors such as ageism and therefore provide a valuable insight into how more macro scale characteristics, such as routines of practice or management styles and social inequalities, can influence and be influenced by micro-interactions that create the backdrop to the | Not identified | not identified | 'malignant' positioning can contribute to the creation of a climate that allows mistreatment to take place, or fails to prohibit its development. Mistreatment of people with dementia is used as an illustration. Positioning theory also allows for an |
|--------|-----|-----|-----|-----------------------------------------------------------------------------------------------------------------------------------------------------------------------------------------------------|---------------------------------------------------------------------------------------------------------------------------------------------------------------------------------------------------------------------------------------------------------------------------------------------------------------------------------------------------------------------------------------------------------------------------------------------------------------------------------------------------------------------------------------------------------------------------------------------------------------------------------------------------------------------------------------------------|----------------|----------------|----------------------------------------------------------------------------------------------------------------------------------------------------------------------------------------------------------------------------------------------------------|

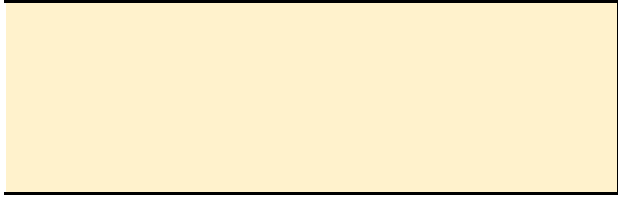



























| Authors                                                                                                    | Year of publication | Title                                                                                                                                             | Aim of study                                                                                                                                                                                                               | Review (yes / no) | Type of review | Country | Study context - maternity care, elderly population, physical restraint/ment | Type of Mistreatment (physical, verbal, physical restraint) | Theoretical perspective (i.e. constructivist, feminist) to undertake study |
|------------------------------------------------------------------------------------------------------------|---------------------|---------------------------------------------------------------------------------------------------------------------------------------------------|----------------------------------------------------------------------------------------------------------------------------------------------------------------------------------------------------------------------------|-------------------|----------------|---------|-----------------------------------------------------------------------------|-------------------------------------------------------------|----------------------------------------------------------------------------|
| Acevedo-Nuevo, M. , Gonzalez-Gil, M. T. , Solis-Munoz, M. , Arias-Rivera, S. , Torano-Olivera, M. J. et al | 2020                | Physical restraint in critical care units from the experience of doctors and nursing assistants: In search of an interdisciplinary interpretation | aims to approach how professionals other than nurses (doctors and nursing assistants) conceptualise the use of PR in CCU and other associated factors, as well as how their experience influences nurses' decision-making. | no                | n/a            | Spain   | critical care                                                               | physical restraint                                          | not identified                                                             |
| Allen, J. J.                                                                                               | 2000                | Seclusion and restraint of children: a literature review                                                                                          | nurses beliefs about seclusion and restraint of children and what alternatives are available                                                                                                                               | yes               | narrative      | various | children's nursing                                                          | physical restraint                                          | not identified                                                             |

|                                                                             |      |                                                                                                                      |                                                                                                                                                                        |    |     |           |                |                    |                |
|-----------------------------------------------------------------------------|------|----------------------------------------------------------------------------------------------------------------------|------------------------------------------------------------------------------------------------------------------------------------------------------------------------|----|-----|-----------|----------------|--------------------|----------------|
| Chapman                                                                     | 2015 | Australian nurses' perceptions of the use of manual restraint in the Emergency Department: a qualitative perspective | To explore emergency nurses perceptions of the use of manual restraint.                                                                                                | No | n/a | Australia | emergency dept | Physical restraint | not identified |
| Cui, N. ,<br>Long, M. ,<br>Zhou, S. ,<br>Zhang, T. ,<br>He, C. ,<br>Gan, X. | 2019 | Knowledge, Attitudes, and Practices of Chinese Critical Care Nurses Regarding Physical Restraint                     | to determine the knowledge, attitudes, and practices regarding the use of physical restraints by Chinese nurses in intensive care units (ICUs) of ter-tiary hospitals. | no | n/a | China     | critical care  | physical restraint | not identified |
| Dolan, J. ,<br>Dolan<br>Looby, S.<br>E.                                     | 2017 | Determinants of Nurses' Use of Physical Restraints in Surgical Intensive Care Unit Patients                          | To describe nurses' determinants of initiation and discontinuation of restraints in surgical intensive care unit patients.                                             | no | n/a | US        | Intensive care | physical restraint | not identified |

|                                                                      |      |                                                                                                                                         |                                                                                                                                                                                                                        |     |           |          |                 |                    |                |
|----------------------------------------------------------------------|------|-----------------------------------------------------------------------------------------------------------------------------------------|------------------------------------------------------------------------------------------------------------------------------------------------------------------------------------------------------------------------|-----|-----------|----------|-----------------|--------------------|----------------|
| Esk,ari, F. ,<br>Abdullah, K. L. ,<br>Zainal, N. Z. ,<br>Wong, L. P. | 2018 | The effect of educational intervention on nurses' knowledge, attitude, intention, practice and incidence rate of physical restraint use | evaluate the effect of educational intervention on nurses' knowledge, attitude, intention, practice and incidence rate of physical restraint in 12 wards of a hospital using a self-reported                           | no  | n/a       | Malaysia | inpatient wards | physical restraint | not identified |
| Hamilton, Deborah ,<br>Griesdale, Donald ,<br>Mion, Lorraine C.      | 2017 | The prevalence and incidence of restraint use in a Canadian adult intensive care unit: A prospective cohort study                       | To determine the extent of physical restraint use in an urban teaching ICU, to identify patient-specific factors that may contribute to the application of physical restraints, and explore nurses' rationale for use. | no  | n/a       | Canada   | intensive care  | physical restraint | not identified |
| Lach, Helen W.                                                       | 2016 | Changing the Practice of Physical Restraint Use in Acute Care                                                                           | evaluate current evidence on use of physical restraint in acute care                                                                                                                                                   | yes | narrative | various  | acute care      | physical restraint | not identified |

|                                                       |      |                                                                                   |                                                                                                                                              |     |         |           |                |                    |                |
|-------------------------------------------------------|------|-----------------------------------------------------------------------------------|----------------------------------------------------------------------------------------------------------------------------------------------|-----|---------|-----------|----------------|--------------------|----------------|
| Lei, R. ,<br>Jiang, X. ,<br>Liu, Q. ,<br>He, H.       | 2020 | Nurse education to reduce physical restraints use in ICU: A scoping review        | To identify and map nurse education strategies that reduce the use of physical restraints in the ICU.                                        | yes | scoping | various   | Intensive care | physical restraint | not identified |
| Martin, B. ,<br>Mathisen, L.                          | 2005 | Use of physical restraints in adult critical care: a bicultural study             | To describe the relationship between patients' characteristics, environment, and use of physical restraints in the United States and Norway. | no  | n/a     | US/Norway | critical care  | physical restraint | not identified |
| Mitchell, D. A. ,<br>Panchisin, T. ,<br>Seckel, M. A. | 2018 | Reducing Use of Restraints in Intensive Care Units: A Quality Improvement Project | To reduce and sustain the restraint rates to less than the national database mean rates for all 5 intensive care units.                      | no  | n/a     | US        | intensive care | physical restraint | not identified |

|                                                  |      |                                                                                     |                                                                                                                     |     |           |         |                             |                    |                |
|--------------------------------------------------|------|-------------------------------------------------------------------------------------|---------------------------------------------------------------------------------------------------------------------|-----|-----------|---------|-----------------------------|--------------------|----------------|
| Paterson, Brodie                                 | 2011 | How corrupted cultures lead to abuse of restraint interventions                     | to explain why corrupt cultures result in abuse of physical restraint                                               | yes | narrative | n/a     | learning difficult          | physical restraint | not identified |
| Perez, D. , Peters, K. , Wilkes, L. , Murphy, G. | 2019 | Physical restraints in intensive care-An integrative review                         | to explore the current literature on the use of PR in intensive care.                                               | yes | mixed     | various | intensive care              | physical restraint | not identified |
| Rainier, N. C.                                   | 2014 | Reducing physical restraint use in alcohol withdrawal patients: a literature review | to see what, if any, alternatives have been tested to improve patient care for this complicated patient population. | yes | narrative | n/a     | alcohol withdrawal patients | physical restraint | not identified |

|                                                                                                                      |      |                                                                                                                                                                             |                                                                                                                                                                      |    |     |       |                |                    |                |
|----------------------------------------------------------------------------------------------------------------------|------|-----------------------------------------------------------------------------------------------------------------------------------------------------------------------------|----------------------------------------------------------------------------------------------------------------------------------------------------------------------|----|-----|-------|----------------|--------------------|----------------|
| Unoki, T. ,<br>Hamamoto, M. ,<br>Sakuramoto, H. ,<br>Shirasaka, M. ,<br>Moriyasu, M. ,<br>Zeng, H. ,<br>Fujitani, S. | 2020 | Influence of mutual support and a culture of blame among staff in acute care units on the frequency of physical restraint use in patients undergoing mechanical ventilation | verify the hypothesis that mutual support and a culture of blame among staff are associated with higher physical restraint use for mechanically ventilated patients. | no | n/a | Japan | Intensive care | physical restraint | not identified |
|----------------------------------------------------------------------------------------------------------------------|------|-----------------------------------------------------------------------------------------------------------------------------------------------------------------------------|----------------------------------------------------------------------------------------------------------------------------------------------------------------------|----|-----|-------|----------------|--------------------|----------------|



|                                                                                                                                                                    |      |                                                                                                                                                               |                                                                                                                                                                                                                                                                                 |    |     |       |               |                    |                |
|--------------------------------------------------------------------------------------------------------------------------------------------------------------------|------|---------------------------------------------------------------------------------------------------------------------------------------------------------------|---------------------------------------------------------------------------------------------------------------------------------------------------------------------------------------------------------------------------------------------------------------------------------|----|-----|-------|---------------|--------------------|----------------|
| Via-Clavero, G. , Guardia-Olmos, J. , Falco-Pegueroles, A. , Gil-Castillejos , D. , Lobo-Civico, A. , De La Cueva-Ariza, L. , Romero-Garcia, M. , Delgado-Hito, P. | 2020 | Factors influencing critical care nurses' intentions to use physical restraints adopting the theory of planned behaviour: A cross-sectional multicentre study | determine critical care nurses'attitudes, subjective norms,perceived behavioural control, and intentions to use physical restraints in intubated patients and the relationship between them and sociodemographic, professional, and contextual factors using a survey approach. | no | n/a | Spain | critical care | physical restraint | not identified |
|--------------------------------------------------------------------------------------------------------------------------------------------------------------------|------|---------------------------------------------------------------------------------------------------------------------------------------------------------------|---------------------------------------------------------------------------------------------------------------------------------------------------------------------------------------------------------------------------------------------------------------------------------|----|-----|-------|---------------|--------------------|----------------|

| Study design (grounded theory/phenomenology/qualitative exploratory, exploratory, | Participant characteristics - staff/professionals (age, profession, ethnicity, etc) | Participant characteristics - patients/service-users (age, ethnicity, etc) | Data collection methods | Apriori theory used to analyse/frame the data? | Key findings/ Themes                                                                                                                                                                                                                                                                                                                                                                                                                                      | Explicit theories used to interpret findings (includes reference/clearl | Theories/ideologies implicit by authors (but not references/explicity named) | Other interpretations used to explain the findings                 |
|-----------------------------------------------------------------------------------|-------------------------------------------------------------------------------------|----------------------------------------------------------------------------|-------------------------|------------------------------------------------|-----------------------------------------------------------------------------------------------------------------------------------------------------------------------------------------------------------------------------------------------------------------------------------------------------------------------------------------------------------------------------------------------------------------------------------------------------------|-------------------------------------------------------------------------|------------------------------------------------------------------------------|--------------------------------------------------------------------|
| qualitative phenomenological interpretive                                         | 18 professionals (doctors and nursing assistants)                                   | n/a                                                                        | focus groups            | theory of planned behaviour, social influence  | The real reduction in the use of physical restraint in CCU must be based on one crucial point: acceptance of the complexity of the phenomenon. The use of physical restraint observed in the different CCU is influenced by individual, group and organisational factors. These factors will determine how doctors and nursing assistants interpret safety and risk, the centre of care (patient or professional-centred care), the concept of restraint, | not identified                                                          | not identified                                                               | risk management - safety of patient and staff                      |
| review                                                                            | n/a                                                                                 | n/a                                                                        | n/a                     | not identified                                 | little known about the seclusion and restraint of children in nursing                                                                                                                                                                                                                                                                                                                                                                                     | not identified                                                          | organisational culture, authoritarianism                                     | safety, appropriate response to physical aggression from a patient |

|                         |                |                     |                            |                |                                                                                                                                                                                                                                                                                                                                               |                |                                           |                                                                                                                                                         |
|-------------------------|----------------|---------------------|----------------------------|----------------|-----------------------------------------------------------------------------------------------------------------------------------------------------------------------------------------------------------------------------------------------------------------------------------------------------------------------------------------------|----------------|-------------------------------------------|---------------------------------------------------------------------------------------------------------------------------------------------------------|
| qualitative exploratory | n/a            | 15 emergency nurses | semi-structured interviews | not identified | themes were identified: 'part of the job', 'reasons for manual restraint', 'restraint techniques', 'consequences' and 'lack of documentation'.                                                                                                                                                                                                | not identified | organisational norms (accepted practice), | considered necessary to deal with aggressive and violent behaviour from patients, or here                                                               |
| Cross sectional         | 383 ICU nurses | n/a                 | survey                     | not identified | nurses employed in the ICUs of tertiary hospitals in Chongqing, China, have relatively insufficient knowledge, comparatively incorrect attitudes, and unreasonable means of practicing physical restraint. Continuing education should focus strongly on the relationship between physical restraint and unplanned                            | not identified | not identified                            | knowledge about physical restraint was inadequate, which might cause inappropriate at-titudes and unsuitable practice. The use of physical re-strain is |
| qualitative expl        | 13 nurses      | n/a                 | semi-structured interviews | not identified | Content analysis revealed 3 general categories and 8 themes that indicated the thoughtful reflection processes nurses in a surgical intensive care unit use to determine use of restraints. Top priorities were ensuring patient safety and comfort. Nurses synthesized factors including practice experience, patient-specific behaviors and | not identified | not identified                            | patient safety, patient behaviour (functional ability)                                                                                                  |

|                                      |                  |                                                                                 |                                                            |                |                                                                                                                                                                                                                                                                                                                                                                                                                                 |                |                |                                                                                                                                                                         |
|--------------------------------------|------------------|---------------------------------------------------------------------------------|------------------------------------------------------------|----------------|---------------------------------------------------------------------------------------------------------------------------------------------------------------------------------------------------------------------------------------------------------------------------------------------------------------------------------------------------------------------------------------------------------------------------------|----------------|----------------|-------------------------------------------------------------------------------------------------------------------------------------------------------------------------|
| A quasi-experimental pre-post design | 245 nurses       | n/a                                                                             | survey                                                     | not identified | There was a statistically significant decrease in the incidence rate of physical restraint use in the wards of the hospital except geriatric-rehabilitation wards after intervention.                                                                                                                                                                                                                                           | not identified | not identified | nurses lack of knowledge and perception of restraint as nurses perceived physical restraint in terms of a protective                                                    |
| mixed methods                        | 30 permanent ICU | 122 patients aged 18 years and over within 12-24 hours of admission to the ICU. | mixed methods (patient data and semistructured interviews) | not identified | The presence of the endotracheal tube and the administration of any opioid or midazolam increased the odds of physical restraint application. Nurses did not consult with physicians before restraining the patients. The primary reason for restraining the patient was to preserve the patient's endotracheal tube                                                                                                            | not identified | not identified | for patient safety to stop interference with tubes - not able to trust the patient to not interfere with tubes when at the bedside of another patient, patients waking  |
| review                               | n/a              | n/a                                                                             | n/a                                                        | not identified | Nurses play a significant role in the use of restraints. Factors such as nurse's knowledge and patient characteristics combined with the culture and resources in health care facilities influence the practice of physical restraint use. Nurses can identify patients at high risk for restraint use; assess the potential causes of unsafe behaviors; and target interventions in the areas of physiological, psychological, | not identified | not identified | Prevention of falls is a primary reason for restraint use on medical-surgical units, whereas preventing removal of medical devices and confusion are primary reasons in |

|                           |     |                             |                                      |                |                                                                                                                                                                                                                                                                                                      |                |                |                                                                                                                                                                                                                                                |
|---------------------------|-----|-----------------------------|--------------------------------------|----------------|------------------------------------------------------------------------------------------------------------------------------------------------------------------------------------------------------------------------------------------------------------------------------------------------------|----------------|----------------|------------------------------------------------------------------------------------------------------------------------------------------------------------------------------------------------------------------------------------------------|
| review                    | n/a | n/a                         | n/a                                  | not identified | There are a variety of nurse education activities that could effectively improve ICU nurses' knowledge, attitudes, and behaviours towards physical restraints. However, the strategies of nurse education, such as delivery mode, teaching methods, and outcome measurements, require further study. | not identified | not identified | nurses had inadequate overall knowledge of physical restraint use, and even when a patient was judged not to need physical restraints, nurses may still apply it as a safety consideration. However, we found a limited number of studies—only |
| descriptive correlational | n/a | 50 patients in each country | observations of patients, chart data | not identified | Critical care units with similar technology and characteristics of patients vary between nations in restraint practices, levels of sedation, and nurse-to-patient ratios. Restraint-free care was, in this sample, safe in                                                                           | not identified | not identified | institutional norms                                                                                                                                                                                                                            |
| case study                | n/a | n/a                         | secondary data analysis and survey   | patient safety | All 5 intensive care units were able to successfully decrease restraint rates to less than the national database mean for the majority of the months since the start of the restraint                                                                                                                | not identified | not identified | patient safety, prevent extubation, lack of alternatives                                                                                                                                                                                       |

|        |     |     |     |                |                                                                                                                                                                                                                                                                                                            |                |                                                                          |                                                                                                                                                                                            |
|--------|-----|-----|-----|----------------|------------------------------------------------------------------------------------------------------------------------------------------------------------------------------------------------------------------------------------------------------------------------------------------------------------|----------------|--------------------------------------------------------------------------|--------------------------------------------------------------------------------------------------------------------------------------------------------------------------------------------|
| review | n/a | n/a | n/a | not identified | In a corrupted culture, the needs of the service user become secondary to the needs of staff, who have become demoralised without adequate training and support. Leadership is seen as critical in the reduction of coercive interventions, but <del>effective staff training can bring</del>              | not identified | corruption, labelling (distancing from clients)                          | work routines and practices that depersonalise and dehumanise service users and staff, weak local management                                                                               |
| review | n/a | n/a | n/a | not identified | Five major themes emerged: (i) prevention of treatment interference; (ii) nurses' role as primary decision-makers PR application and removal; (iii) adherence to PR protocols; (iv) moral and ethical dilemmas faced by nurses; and (v) experiences of patients and families.                              | not identified | theory of planned behaviour - intention influenced by workload pressures | prevent self-extubation, nurses as decision makers - nurses' perception of patient harm and workload pressures profoundly influenced their role as primary decision-makers in this context |
| review | n/a | n/a | n/a | not identified | Despite the wealth of research on both alcohol withdrawal and physical restraint, there is little research that explores the relationship between the two. The only evidenced-based intervention at this time is proper pharmacological management and restraint education. Education should be focused on | not identified | not identified                                                           | Clinical justifications for use include prevention of delayed delivery in care resulting from dislodged lines and tubes and ensuring patient safety, restrained                            |

|                 |                                                                                                     |     |        |                                         |                                                                                                                                                                                                                                                                                                                                                                                                                                                       |                |                                       |  |
|-----------------|-----------------------------------------------------------------------------------------------------|-----|--------|-----------------------------------------|-------------------------------------------------------------------------------------------------------------------------------------------------------------------------------------------------------------------------------------------------------------------------------------------------------------------------------------------------------------------------------------------------------------------------------------------------------|----------------|---------------------------------------|--|
| cross sectional | 333 nurses in intensive care units caring for mechanically ventilated patients in acute care units. | n/a | survey | organisational norms - culture of blame | The mean number of beds per nurse was not significantly different between the groups; the mean and percentage of positive responses about mutual support and a culture of blame were significantly lower in the high frequency physical restraint use group. After adjusting variables in a multivariable regression analysis, a less positive response about the culture of blame was the only independent factor to predict high frequency physical | not identified | blame culture, lack of mutual support |  |
|-----------------|-----------------------------------------------------------------------------------------------------|-----|--------|-----------------------------------------|-------------------------------------------------------------------------------------------------------------------------------------------------------------------------------------------------------------------------------------------------------------------------------------------------------------------------------------------------------------------------------------------------------------------------------------------------------|----------------|---------------------------------------|--|

|                 |                                                                                                                                                                                                        |     |        |                             |                                                                                                                                                                                                                                                                                         |                             |                |                                                                                                                                                                                                                                                                                                          |
|-----------------|--------------------------------------------------------------------------------------------------------------------------------------------------------------------------------------------------------|-----|--------|-----------------------------|-----------------------------------------------------------------------------------------------------------------------------------------------------------------------------------------------------------------------------------------------------------------------------------------|-----------------------------|----------------|----------------------------------------------------------------------------------------------------------------------------------------------------------------------------------------------------------------------------------------------------------------------------------------------------------|
| cross sectional | 354 ICU nurses from 2 ICUs (eight general ICUs, two cardiological ICUs, one surgical ICU, and one burn ICU) from eight acute care hospitals (five public and three private) in three regions in Spain, | n/a | survey | theory of planned behaviour | Critical care nurses' intentions to use physical restraints are moderate and are influenced by intrapersonal, patient, and contextual factors. Nurses who work in units with organisational policies and alternatives to restraints demonstrated lower levels of intention to use them. | theory of planned behaviour | not identified | attitudes - nurses agreed on the hazards of using restraints, their confidence in physical restraints as safety equipment to avoid unplanned removal of life-support devices and to provide professional safety for nurses remained high. Subjective norms - nurses did not perceive that other expected |
|-----------------|--------------------------------------------------------------------------------------------------------------------------------------------------------------------------------------------------------|-----|--------|-----------------------------|-----------------------------------------------------------------------------------------------------------------------------------------------------------------------------------------------------------------------------------------------------------------------------------------|-----------------------------|----------------|----------------------------------------------------------------------------------------------------------------------------------------------------------------------------------------------------------------------------------------------------------------------------------------------------------|



|  |  |
|--|--|
|  |  |
|  |  |





ns - patient safety







| Authors                                                    | Year of publication | Title                                                                                                     | Aim of study                                                                                                                        | Review (yes / no) | Type of review | Intervention study (YES/NO) | If intervention study - name of intervention (if) | Details of intervention | Country       | Study context - maternity care, elderly population, physical restraint/mental health | Type of Mistreatment (physical, verbal, physical restraint) | Theoretical perspective (i.e. constructivist, feminist) | Study design (grounded theory/phenomenology/q) | Year when data was collected | Sample strategy |
|------------------------------------------------------------|---------------------|-----------------------------------------------------------------------------------------------------------|-------------------------------------------------------------------------------------------------------------------------------------|-------------------|----------------|-----------------------------|---------------------------------------------------|-------------------------|---------------|--------------------------------------------------------------------------------------|-------------------------------------------------------------|---------------------------------------------------------|------------------------------------------------|------------------------------|-----------------|
| Anderson                                                   | 2003                | Nursing Homes as Complex Adaptive Systems: Relationship between Management Practice and Resident Outcomes | To test complexity science hypotheses about the relationship between management practices (communication openness, participation in | No                | n/a            |                             |                                                   |                         | US            | elderly population                                                                   | Physical restraint                                          | not identified                                          | cross sectional/correlation                    |                              |                 |
| Anderson, K. and Bird, M. and MacPherson, S. and Blair, A. | 2016                | How do staff influence the quality of long-term dementia care and the lives of residents? A systematic    | our aim was to answer the following research question: Is it possible to determine which aspects of residential care                | yes               | mixed          |                             |                                                   |                         | various       | elderly population                                                                   | physical restraint                                          | not identified                                          | Mixed methods review                           |                              |                 |
| Varon, M. and Tabak, N.                                    | 1996                | Restraining patients as part of hospital policy                                                           | examine the use of patient restraints in geriatric institutions.                                                                    | no                | n/a            |                             |                                                   |                         | not specified | elderly population                                                                   | Physical restraint                                          | not identified                                          | cross sectional survey                         |                              |                 |
| Castle, N. G.                                              | 2000                | Differences in nursing homes with increasing and decreasing use of physical                               | examines the organizational characteristics of nursing homes associated with                                                        | no                | n/a            |                             |                                                   |                         | US            | elderly                                                                              | physical restraint                                          | not identified                                          | cross sectional                                |                              |                 |



|                                                                                   |      |                                                                                                                               |                                                                                                                                        |     |           |  |  |  |                                          |                    |                    |             |                        |  |  |
|-----------------------------------------------------------------------------------|------|-------------------------------------------------------------------------------------------------------------------------------|----------------------------------------------------------------------------------------------------------------------------------------|-----|-----------|--|--|--|------------------------------------------|--------------------|--------------------|-------------|------------------------|--|--|
| Hamers, J. P. and Meyer, G. and Kopke, S. and Lindenma                            | 2009 | Attitudes of Dutch, German and Swiss nursing staff towards physical restraint use in nursing home                             | To investigate the attitudes of nursing staff towards restraint measures and restraint use in nursing home                             | no  | n/a       |  |  |  | The Netherlands, Germany and Switzerland | elderly            | Physical re        | not identif | cross sectional survey |  |  |
| Gallinagh, R. and Nevin, R. and McIlroy, D. and Mitchell, F. and Campbell, L. and | 2002 | The use of physical restraints as a safety measure in the care of older people in four rehabilitation wards: findings from an | to investigate the prevalence and type of physical restraint used with older persons on four rehabilitation wards in Northern Ireland. | no  | n/a       |  |  |  | Northern Ireland                         | elderly            | Physical restraint | not identif | observational          |  |  |
| Gunawardena, R. and Smithard, D. G.                                               | 2019 | The Attitudes Towards the Use of Restraint and Restrictive Intervention Amongst                                               | review of literature about The Attitudes Towards the Use of Restraint and Restrictive                                                  | yes | narrative |  |  |  | n/a                                      | elderly population | Physical restraint | not identif | review                 |  |  |
| Huang, H. C. and Huang, Y. T. and Lin, K. C. and Kuo, Y. F.                       | 2014 | Risk factors associated with physical restraints in residential aged care facilities: a community-based                       | To identify the rate and risk factors of physical restraint in residential aged care facilities in Taiwan.                             | no  | n/a       |  |  |  | Taiwan                                   | elderly population | Physical restraint | not identif | cross sectional survey |  |  |

|                                                                 |      |                                                                                                     |                                                                                                                              |     |               |  |  |  |         |                    |                    |                |        |  |  |
|-----------------------------------------------------------------|------|-----------------------------------------------------------------------------------------------------|------------------------------------------------------------------------------------------------------------------------------|-----|---------------|--|--|--|---------|--------------------|--------------------|----------------|--------|--|--|
| Andrews, G. J. and Peter, E.                                    | 2006 | Moral geographies of restraint in nursing homes                                                     | to examine the occurrence of PR in nursing homes using moral geographies                                                     | yes | narrative     |  |  |  | n/a     | elderly population | Physical restraint | not identified | review |  |  |
| Backhaus, R. and Verbeek, H. and van                            | 2014 | Nurse staffing impact on quality of care in nursing homes: a systematic                             | summarizes the findings from recent longitudinal studies about quality of care in                                            | yes | quantitative  |  |  |  | various | elderly population | Physical restraint | not identified | review |  |  |
| Blakeslee, J. A. and Goldman, B. D. and                         | 1991 | Making the transition to restraint-free care                                                        | review of literature on restraint in nursing homes proposing a restraint-free care                                           | yes | narrative     |  |  |  | n/a     | elderly population | Physical restraint | not identified | review |  |  |
| Brower, H. T.                                                   | 1991 | The alternatives to                                                                                 | review of the literature to introduce alternatives to PR                                                                     | yes | narrative     |  |  |  | n/a     | elderly population | Physical restraint | not identified | review |  |  |
| Brugnolli, A. and Canzan, F. and Mortari, L. and Saiani, L. and | 2020 | The Effectiveness of Educational Training or Multicomponent Programs to Prevent the Use of Physical | assesses the effectiveness of interventions to reduce physical restraint (PR) use in older people living in nursing homes or | yes | meta-analysis |  |  |  | various | elderly population | physical restraint | not identified | review |  |  |

|                                              |      |                                                                                                                       |                                                                                                                               |     |           |  |  |  |     |                    |                    |                |                         |  |  |
|----------------------------------------------|------|-----------------------------------------------------------------------------------------------------------------------|-------------------------------------------------------------------------------------------------------------------------------|-----|-----------|--|--|--|-----|--------------------|--------------------|----------------|-------------------------|--|--|
| Caprio, T. V. and Katz, P. R. and Karuza, J. | 2008 | Commentary: The physician's role in nursing home quality of care: focus on restraints                                 | how the physician's role fits into this equation for nursing homes and its implications for                                   | yes | narrative |  |  |  | n/a | elderly population | physical restraint | not identified | review                  |  |  |
| Cassie, K. M. and Cassie, W.                 | 2013 | Racial disparities in the use of physical restraints in U.S.                                                          | to determine if black residents were more susceptible to the                                                                  | no  | n/a       |  |  |  | US  | elderly population | Physical restraint | not identified | cross sectional survey  |  |  |
| Castle, Nicholas G. and Banaszak-Holl, Jane  | 2003 | The Effect of Administrative Resources on Care in Nursing Homes                                                       | evaluates whether the hours spent on the job by nursing home administration have an effect on the quality of care             | no  | N/a       |  |  |  | US  | elderly population | Physical restraint | not identified | secondary data analysis |  |  |
| Castle, N. G. and Fogel, B.                  | 1998 | Characteristics of nursing homes that are restraint free                                                              | examine differences between restraint free and non-restraint free nursing homes                                               | no  | n/a       |  |  |  | US  | elderly population | Physical restraint | not identified | secondary data analysis |  |  |
| Castle, N. G. and Fogel, B. and Mor, V.      | 1997 | Risk factors for physical restraint use in nursing homes: pre- and post-implementation of the Nursing Home Reform Act | (1) to identify resident and facility risk factors for the use of physical restraints since the implementation of the Nursing | no  | n/a       |  |  |  | US  | elderly population | Physical restraint | not identified | secondary data analysis |  |  |

|                                                                         |      |                                                                                                                    |                                                                                                                                                                                                                                      |    |     |  |  |  |                                       |                                           |                    |             |                               |  |
|-------------------------------------------------------------------------|------|--------------------------------------------------------------------------------------------------------------------|--------------------------------------------------------------------------------------------------------------------------------------------------------------------------------------------------------------------------------------|----|-----|--|--|--|---------------------------------------|-------------------------------------------|--------------------|-------------|-------------------------------|--|
| Darcy, L.                                                               | 2007 | Reducing and/or minimising physical restraint in a                                                                 | describe a a journey of implementing evidence-based                                                                                                                                                                                  | no | n/a |  |  |  | australia                             | elderly                                   | physical restraint | not identif | case study                    |  |
| Goethals, S. and Dierckx de Casterle, B. and Gastman                    | 2013 | Nurses' ethical reasoning in cases of physical restraint in acute elderly care: a qualitative study                | to explore the ethical reasoningprocess of nurses in cases of physical restraint in acuteelderly care.                                                                                                                               | no | n/a |  |  |  | Belgium                               | elderly acute care                        | Physical restraint | not identif | grounded theory               |  |
| Gordon, S. E. and Dufour, A. B. and Monti, S. M. and Mattison,          | 2016 | Impact of a Videoconference Educational Intervention on Physical Restraint and Antipsychotic                       | Evaluate the use of ECHO-AGE (videoconference sessions between frontline nursing home staff and clinical experts at                                                                                                                  | no | n/a |  |  |  | US (Massachusetts and Maine)          | elderly residential care                  | physical restraint | not identif | secondary data analysis       |  |
| Hamers, J. P. and Bleijlevens, M. H. and Gulpers, M. J. and Verbeek, H. | 2009 | Behind Closed Doors: Involuntary Treatment in Care of Persons with Cognitive Impairment at Home in the Netherlands | To investigate the attitudes of nursing staff towards restraint measures and restraint use in nursing home residents, and to investigate if these attitudes are influenced by country of residence and individual characteristics of | no | n/a |  |  |  | The Netherlands, Germany, Switzerland | health care for elderly in a home setting | physical restraint | not identif | cross sectional questionnaire |  |
| Hantikainen, V.                                                         | 1998 | Physical restraint: a descriptive study in Swiss nursing homes                                                     | to explore the the reasons for using physical restraints, their prevalence andnurses'                                                                                                                                                | no | n/a |  |  |  | Switzerland                           | elderly population                        | physical restraint | not identif | cross sectional questionnaire |  |

|                                                      |      |                                                                                                                   |                                                                                                                                                                |     |           |  |  |  |             |                    |                    |                |                               |  |
|------------------------------------------------------|------|-------------------------------------------------------------------------------------------------------------------|----------------------------------------------------------------------------------------------------------------------------------------------------------------|-----|-----------|--|--|--|-------------|--------------------|--------------------|----------------|-------------------------------|--|
| Hantikainen, V. and Kappeli, S.                      | 2000 | Using restraint with nursing home residents: a qualitative study of nursing staff perceptions and decision-making | to explore nursing staff members' perceptions of restraint and how these perceptions govern decision-                                                          | no  | n/a       |  |  |  | Switzerland | elderly population | physical restraint | not identified | phenomenology                 |  |
| Hardin, S. B. and Magee, R. and Stratmann, D. and    | 1994 | Extended care and nursing home staff attitudes toward restraints. Moderately                                      | staff attitudes towards restraint                                                                                                                              | no  | n/a       |  |  |  | US          | elderly population | physical restraint | not identified | cross sectional questionnaire |  |
| Harding, G. and King, L.                             | 2005 | Adhering to the principles of restraint free environments in                                                      | summarise the reasons behind continued use of physical restraints                                                                                              | yes | narrative |  |  |  | various     | elderly population | physical restraint | not identified | review                        |  |
| Heeren, P. and Van de Water, G. and De Paepe, L. and | 2014 | Staffing levels and the use of physical restraints in nursing homes: a multicenter study                          | examine the relation between ward staffing levels (e.g. staff intensity and staff mix) and the use of physical                                                 | no  | n/a       |  |  |  | Belgium     | elderly population | physical restraint | not identified | cross sectional survey        |  |
| Heinze, C. and Dassen, T. and Grittner, U.           | 2012 | Use of physical restraints in nursing homes and hospitals and related factors: a cross-sectional study            | to investigate factors related to the use of restraints and to explore whether the rate of nurses was an influencing factor regarding the use of restraints in | no  | n/a       |  |  |  | Germany     | elderly population | physical restraint | not identified | secondary data analysis       |  |
| Hennessy, C. H. and McNeely, E. A. and               | 1997 | Perceptions of physical restraint use and barriers to restraint                                                   | examine administrators and nursing staff views of restraints and perceptions of                                                                                | no  | n/a       |  |  |  | US          | elderly population | physical restraint | not identified | qualitative exploratory       |  |

|                                                                     |      |                                                                                                                          |                                                                                                                                                       |     |              |  |  |  |           |                    |                    |                |                               |  |  |
|---------------------------------------------------------------------|------|--------------------------------------------------------------------------------------------------------------------------|-------------------------------------------------------------------------------------------------------------------------------------------------------|-----|--------------|--|--|--|-----------|--------------------|--------------------|----------------|-------------------------------|--|--|
| Mion, L. C. and S and hu, S. K. and Khan, R. H. and Ludwick, R. and | 2010 | Effect of situational and clinical variables on the likelihood of physicians ordering physical restraints                | To model clinical and situational variables that may affect likelihood of physicians to order physical restraints.                                    | no  | n/a          |  |  |  | US        | elderly population | physical restraint | not identified | cross sectional questionnaire |  |  |
| Mohler, R. and Richter, T. and Kopke, S. and Meyer, G.              | 2012 | Interventions for preventing and reducing the use of physical restraints in long-term geriatric care - a Cochrane review | To evaluate the effectiveness of interventions to prevent and reduce the use of physical restraints in older people requiring long-term nursing care. | yes | quantitative |  |  |  | various   | elderly            | Physical restraint | not identified | review                        |  |  |
| Mohler, R. and Richter, T. and                                      | 2011 | Interventions for preventing and reducing the use of physical                                                            | same as Mohler 2012 (one is a cocrane review report)                                                                                                  |     |              |  |  |  |           |                    |                    |                |                               |  |  |
| Nay, R. and Koch, S.                                                | 2006 | Overcoming restraint use: examining barriers in Australian aged care facilities                                          | to discuss the outcomes of a project that sought to identify alternatives to restraint use in                                                         | no  | n/a          |  |  |  | Australia | elderly population | physical restraint | not identified | qualitative exploratory       |  |  |

|                                                                                 |      |                                                                                                                    |                                                                                                                    |    |     |  |  |  |                |                    |                     |                    |                         |  |  |
|---------------------------------------------------------------------------------|------|--------------------------------------------------------------------------------------------------------------------|--------------------------------------------------------------------------------------------------------------------|----|-----|--|--|--|----------------|--------------------|---------------------|--------------------|-------------------------|--|--|
| Sullivan-Marx, E. M. and Strumpf, N. E. and Evans, L. K. and Baumgarten, M. and | 1999 | Predictors of continued physical restraint use in nursing home residents following restraint reduction efforts     | identify resident characteristics and environmental factors associated with initiation of physical restraint.      | no | n/a |  |  |  | US             | elderly population | physical restraint  | not identified     | secondary data analysis |  |  |
| Hantikainen, V.                                                                 | 2001 | Nursing staff perceptions of the behaviour of older nursing home residents and decision making on restraint use: a | examined staff perceptions of the behaviour of older nursing home residents and how these perceptions govern their | no | n/a |  |  |  | Switzerland    | elderly population | physical restraint  | not identified     | phenomenology           |  |  |
| Buzgova, R. and Ivanova, K.                                                     | 2011 | Violation of ethical principles in institutional care for older people                                             | This study focuses on issues of elder abuse in residential settings                                                | no | n/a |  |  |  | Czech Republic | Elderly population | Verbal and physical | Ethical principles | qualitative exploratory |  |  |
| Ben Natan, M. and Akriah,                                                       | 2010 | Physically restraining elder residents of long-term care                                                           | to identify and analyse major variables affecting intended                                                         | no | n/a |  |  |  | Israel         | elderly population | physical restraint  | not identified     | cross sectional survey  |  |  |
| Bourbonniere, M. and Strumpf, N. E. and Evans, L.                               | 2003 | Organizational characteristics and restraint use for hospitalized nursing home residents                           | To examine the effect of organizational characteristics on physical restraint use for                              | no | n/a |  |  |  | US             | elderly population | physical restraint  | not identified     | secondary data analysis |  |  |

|                                               |      |                                                       |                                                                               |    |     |  |  |  |           |                    |                    |                |                         |  |  |
|-----------------------------------------------|------|-------------------------------------------------------|-------------------------------------------------------------------------------|----|-----|--|--|--|-----------|--------------------|--------------------|----------------|-------------------------|--|--|
| Lai, C. K. Y. and Kong, S. K. F. and Chow, S. | 2003 | A restraint reduction program in a local old age home | to investigate whether a staff educational program and the establishment of a | no | n/a |  |  |  | Hong Kong | elderly population | physical restraint | not identified | secondary data analysis |  |  |
|-----------------------------------------------|------|-------------------------------------------------------|-------------------------------------------------------------------------------|----|-----|--|--|--|-----------|--------------------|--------------------|----------------|-------------------------|--|--|



| Sample size | Inclusion criteria | Exclusion criteria | Participant characteristics - staff/professionals (age, | Participant characteristics - patients/service-users | Ethical approval/ethical issues well considered? | Data collection methods                                                  | Data analysis methods | A priori theory used to analyse/frame the data? | Evidence of effect of the intervention | Key findings/Themes                                                  | Explicit theories used to interpret findings (includes                | Theories /ideologies implicit by authors (but not    | Other interpretations used to explain the findings                              |
|-------------|--------------------|--------------------|---------------------------------------------------------|------------------------------------------------------|--------------------------------------------------|--------------------------------------------------------------------------|-----------------------|-------------------------------------------------|----------------------------------------|----------------------------------------------------------------------|-----------------------------------------------------------------------|------------------------------------------------------|---------------------------------------------------------------------------------|
|             |                    |                    | n/a                                                     | nursing and registered nurses                        |                                                  | survey data from staff and secondary data analysis from clinical reports |                       | Complexity theory                               |                                        | management practices that facilitate self-organization contribute to | Complexity theory, theory of self-organization (practice that changes | organizational culture                               | greater communication openness and smaller organizational size related to lower |
|             |                    |                    | n/a                                                     | n/a                                                  |                                                  | n/a                                                                      |                       | not identified                                  |                                        | When staff treat and interact empathetically and humanely in         | Not identified                                                        | staff fearing that residents will fall or be in pain | v. little in this one because the focus of the review is predictor              |
|             |                    |                    | 8 nursing service administrators                        | n/a                                                  |                                                  | survey                                                                   |                       | not identified                                  |                                        | procedures and policies regarding restraint                          | not identified                                                        | not identified                                       | reasons for applying restraints appear                                          |
|             |                    |                    | n/a                                                     | n/a                                                  |                                                  | secondary data analysis (survey data)                                    |                       | not identified                                  |                                        | that some nursing homes have                                         | not identified                                                        | not identified                                       | larger facilities, those with Alzheimer                                         |

|  |  |  |                                                              |                                                           |  |                          |  |                                                                            |                                                                  |                |                                                  |                                                                               |
|--|--|--|--------------------------------------------------------------|-----------------------------------------------------------|--|--------------------------|--|----------------------------------------------------------------------------|------------------------------------------------------------------|----------------|--------------------------------------------------|-------------------------------------------------------------------------------|
|  |  |  | convenience sample of nursing staff employed                 | n/a                                                       |  | survey                   |  | not identified                                                             | Nursing staff from three European countries                      | not identified | not identified                                   | PR considered clinically appropriate. Dutch nursing                           |
|  |  |  | n/a                                                          | 102 patients                                              |  | longitudinal observation |  | not identified                                                             | Those who were restrained were dependent on nursing care to meet | not identified | not identified                                   | physical restraint in care plan, patient dependency levels, patient wandering |
|  |  |  | n/a                                                          | n/a                                                       |  | n/a                      |  |                                                                            | The reasons why restraints are used,                             | patient safety | Cultural, Maintaining a device in situ, Workload |                                                                               |
|  |  |  | 256 primary caregivers (78 nurses and 178 care aides) across | 847 residents across 178 residential aged care facilities |  | epidemiological survey   |  | theoretical framework suggested based around facility level and individual | Of 847 residents, 62% (527) were restrained during the           | not identified | patient safety                                   | family signed an agreement for restraint to be used                           |

|  |  |  |     |     |  |     |  |                   |                                                                                        |                                    |                                                                               |                                   |
|--|--|--|-----|-----|--|-----|--|-------------------|----------------------------------------------------------------------------------------|------------------------------------|-------------------------------------------------------------------------------|-----------------------------------|
|  |  |  | n/a | n/a |  | n/a |  | moral geographies | Nurses are located centrally in the circuitry of institutional power, constituting one | patient safety, emplaced autonomy, | institution as a public place, medicalisation, spatial and social limitations |                                   |
|  |  |  | n/a | n/a |  | n/a |  | not identified    | No consistent evidence was                                                             | not identified                     | not identified                                                                | staff training and experience     |
|  |  |  | n/a | n/a |  | n/a |  | not identified    | physical restraints in long term care settings                                         | not identified                     | not identified                                                                | overprotective concern for safety |
|  |  |  | n/a | n/a |  | n/a |  | not identified    | once restraints have been applied,                                                     | not identified                     | patient safety                                                                | not identified                    |
|  |  |  | n/a | n/a |  | n/a |  | not identified    | This review includes 16 studies in a qualitative                                       | not identified                     | patient safety                                                                | not identified                    |

|  |  |  |     |                             |  |                                                                                   |  |                                                            |                                                                            |                |                                                 |                                                                               |
|--|--|--|-----|-----------------------------|--|-----------------------------------------------------------------------------------|--|------------------------------------------------------------|----------------------------------------------------------------------------|----------------|-------------------------------------------------|-------------------------------------------------------------------------------|
|  |  |  | n/a | n/a                         |  | n/a                                                                               |  | not identified                                             | To achieve effective physician integration to the nursing                  | not identified | medical model, patient safety, elderly as frail | lack of committed workforce                                                   |
|  |  |  | n/a | 13,507 residents from 1,174 |  | survey                                                                            |  | racial disparities                                         | Findings revealed that black                                               | racism         | not identified                                  | not identified                                                                |
|  |  |  | n/a | n/a                         |  | secondary data analysis - uses data from the 1999 On-                             |  | Open-systems theory(Scott, 1981). nursing homes are "work- | the results indicate that the quality indicators are                       | not identified | organizational culture - inefficient management | number of FTE nursing hours and patient characteri                            |
|  |  |  | n/a | n/a                         |  | secondary data analysis - data from the On-line Survey and Certification of Auto- |  | not identified                                             | Restraint free nursing homes were found more likely to have residents with | not identified | not identified                                  | Ownership, chain membership, average occupancy rates, facility size, staffing |
|  |  |  | n/a | n/a                         |  | secondary data analysis - the Health Care Financing Administr                     |  | not identified                                             | Full-time-equivalent (FTE) nurse aides perresident, FTE RNs per resident,  | not identified | not identified                                  | restrained residents are more likely to have higher                           |

|  |  |  |                                                                                                      |     |  |                                                     |  |                |  |                                                                                                               |                                                       |                                                             |                                                                                                       |
|--|--|--|------------------------------------------------------------------------------------------------------|-----|--|-----------------------------------------------------|--|----------------|--|---------------------------------------------------------------------------------------------------------------|-------------------------------------------------------|-------------------------------------------------------------|-------------------------------------------------------------------------------------------------------|
|  |  |  | n/a                                                                                                  | n/a |  | case study (audit)                                  |  | not identified |  | Effective change processes can be                                                                             | not identified                                        | not identified                                              | maintaining the safety of the                                                                         |
|  |  |  | 21 acute geriatric nurses from 12 hospitals                                                          | n/a |  | semi-structured interviews                          |  | not identified |  | Ethical decision-making in cases of physical restraint                                                        | nursing as moral practice, patient safety, protecting | protection of physical integrity, followed by psychological | Nurses' decision-making in cases of physical restraint                                                |
|  |  |  | Nursing home staff and a hospital-based team of                                                      | n/a |  | secondary data analysis (data collected by nursing) |  | not identified |  | Residents in ECHO-AGE facilities were 75% less likely to                                                      | not identified                                        | not identified                                              | patient characteristics - disruptive behaviour                                                        |
|  |  |  | convenience sample of nursing staff in The Netherlands (n=166), Germany (n=258), and Switzerland (n= | n/a |  | questionnaire                                       |  | not identified |  | In general, nursing staff held rather neutral opinions regarding the use of physical restraints, but assessed | not identified                                        | culture                                                     | Dutch nursing staff consistently assessed restraint measures as less restrictive than both German and |
|  |  |  | 173 nurses, trained nurse's aids and auxiliary                                                       | n/a |  | questionnaire                                       |  | not identified |  | The most common reasons indicated for the use of                                                              | not identified                                        | patient pro                                                 | the prevention of disturbance to other                                                                |

|  |  |  |                                                       |                                               |  |                                                        |  |                |  |                                                                    |                |                                                        |                                                                               |
|--|--|--|-------------------------------------------------------|-----------------------------------------------|--|--------------------------------------------------------|--|----------------|--|--------------------------------------------------------------------|----------------|--------------------------------------------------------|-------------------------------------------------------------------------------|
|  |  |  | 20 trained and untrained nursing staff from two Swiss | n/a                                           |  | unstructured interviews                                |  | not identified |  | Three main themes were extracted from the data: (1) understa       | not identified | safety and protection of resident, promoting the well- | not identified                                                                |
|  |  |  | all nursing staff on two nursing home                 | n/a                                           |  | questionnaire                                          |  | not identified |  | It is difficult to determine whether                               | not identified | patient pro                                            | falling, violent behaviour, interfering with                                  |
|  |  |  | n/a                                                   | n/a                                           |  | n/a                                                    |  | not identified |  | continued physical restraint                                       | not identified | attitudes towards elderly and use                      | lack of education, insufficient                                               |
|  |  |  | n/a                                                   | 570 older persons (median age 86 years; 77.2% |  | survey                                                 |  | not identified |  | Neither staff intensity nor staff mix was a determin               | not identified | not identified                                         | patient characteristics - bathing dependency, transfer                        |
|  |  |  | 76 nursing homes (n= 5521) and 15 hospitals (n= 2827) | n/a                                           |  | secondary data analysis of cross sectional survey data |  | not identified |  | The prevalence of restraints (bed rails and/or belts) was 9.3% for | not identified | not identified                                         | more prevalent in women, older patients, patients with a high care dependence |
|  |  |  | administrators and nursing staff in a                 | n/a                                           |  | focus groups                                           |  | not identified |  | Although respondents lacked a shared definition                    | not identified | resident safety, prevent litigation, paternalis        | to prevent falls and other hazard                                             |

|  |  |  |                                                    |     |  |                                  |  |                                                                   |  |                                                                                                           |                |                                                                  |                                                                                           |
|--|--|--|----------------------------------------------------|-----|--|----------------------------------|--|-------------------------------------------------------------------|--|-----------------------------------------------------------------------------------------------------------|----------------|------------------------------------------------------------------|-------------------------------------------------------------------------------------------|
|  |  |  | One hundred eighty-nine physicians: interns in all | n/a |  | survey with vignettes            |  | authors developed a framework involving ecology (situation), cues |  | The mean likelihood that physicians would order                                                           | not identified | patient behaviour as overriding factor, patient safety - beliefs | not identified                                                                            |
|  |  |  | n/a                                                | n/a |  | n/a                              |  | none mentioned                                                    |  | Six cluster-randomised controlled trials met the inclusion criteria. All studies investigated educational | not identified | not identified                                                   | inconclusive evidence about whether an education intervention is effective at reducing PR |
|  |  |  |                                                    |     |  |                                  |  |                                                                   |  |                                                                                                           |                |                                                                  |                                                                                           |
|  |  |  | 272 stakeholders                                   | n/a |  | discussion forums and interviews |  | not identified                                                    |  | participants identified legal concerns, existing                                                          | not identified | protection of patient safety, concerns about                     | not identified                                                                            |

|  |  |  |                                                       |                                                         |  |                                                                      |  |                                                                                         |  |                                                                                  |                                                                          |                                                        |                                                                            |
|--|--|--|-------------------------------------------------------|---------------------------------------------------------|--|----------------------------------------------------------------------|--|-----------------------------------------------------------------------------------------|--|----------------------------------------------------------------------------------|--------------------------------------------------------------------------|--------------------------------------------------------|----------------------------------------------------------------------------|
|  |  |  | n/a                                                   | n/a                                                     |  | secondary analysis of an existing data set of nursing home residents |  | A conceptual model for the use of restraints (Kayser-Jones, 1992) involving interaction |  | Lower cognitive status (OR 51.5 [for every 7-point decrease in Mini-Mental       | not identified                                                           | not identified                                         | Initiation of restraint occurred more often when residents were cognitivel |
|  |  |  | 20 trained and untrained nursing staff from two Swiss | n/a                                                     |  | unstructured interviews                                              |  | not identified                                                                          |  | Two main themes were extracted from the data: (i)                                | not identified                                                           | safety of older person and other residents in relation | not identified                                                             |
|  |  |  | 454 employees                                         | 488 clients from 12 residential homes for older people. |  | structured interviews, questionnaires                                |  | not identified                                                                          |  | 54% employees had committed at least one form of elder abuse - 65% had witnessed | Ethical principles were used - respect (e.g. violation of dignity), non- | not identified                                         | stress of the job (burnout) understaffing, inadequate time for individual  |
|  |  |  | 120 nurses from all units of                          | n/a                                                     |  | survey                                                               |  | theory of reasoned action                                                               |  | The research results indicate                                                    | theory of reasoned actions (nurses                                       | not identified                                         | not identified                                                             |
|  |  |  | Eleven medical and surgical units in one 600-         | One hundred seventy-four nursing homes                  |  | Secondary analysis of data obtained                                  |  | not identified                                                                          |  | Key findings suggest that organization                                           | not identified                                                           | patient safety                                         | organizational structures - understaffing                                  |



|  |  |  |     |                      |  |                                  |  |                |  |                                        |                |                |                                         |
|--|--|--|-----|----------------------|--|----------------------------------|--|----------------|--|----------------------------------------|----------------|----------------|-----------------------------------------|
|  |  |  | n/a | 90 elderly residents |  | secondary data analysis & survey |  | not identified |  | the use of physical restraints was not | not identified | not identified | Dependency level rather than ambulatory |
|--|--|--|-----|----------------------|--|----------------------------------|--|----------------|--|----------------------------------------|----------------|----------------|-----------------------------------------|

| Authors     | Year of publication | Title                                                                       | Aim of study                                                                                | Review (yes / no) | Type of review | Country                                        | Study context - maternity care, elderly population, physical restraint/mental health | Type of Mistreatment (physical, verbal, physical restraint) |
|-------------|---------------------|-----------------------------------------------------------------------------|---------------------------------------------------------------------------------------------|-------------------|----------------|------------------------------------------------|--------------------------------------------------------------------------------------|-------------------------------------------------------------|
| Al-Maraira, | 2019                | Use of Restraint and Seclusion in Psychiatric Settings: A Literature Review | Review restraint studies to identify patients' perspectives and factors which influence use | YES               | Umbrella       | Multinational; most reported in USA and Europe | psychiatric patients                                                                 | physical restraint                                          |

|                              |      |                                                                                                                          |                                                                                                                                                     |     |            |                      |                                      |                    |
|------------------------------|------|--------------------------------------------------------------------------------------------------------------------------|-----------------------------------------------------------------------------------------------------------------------------------------------------|-----|------------|----------------------|--------------------------------------|--------------------|
| Ashcraft, L. and Anthony, W. | 2008 | Eliminating seclusion and restraint in recovery-oriented crisis services                                                 | describes an initiative that began in 1999 at two crisis centers that was designed to completely eliminate the practice of seclusion and restraint. | no  | n/a        | US (Arizona)         | mental health crisis centre          | physical restraint |
| Barbui, C. et al.            | 2020 | Efficacy of interventions to reduce coercive treatment in mental health services: umbrella review of randomised evidence | Evaluate evidence on the efficacy of interventions to reduce coercive treatment                                                                     | YES | Literature | n=19 Europe, n=4 USA | people with mental health conditions | physical restraint |

|                  |     |                                                                                                                                                                          |                                                                                             |    |     |           |                                                     |                    |
|------------------|-----|--------------------------------------------------------------------------------------------------------------------------------------------------------------------------|---------------------------------------------------------------------------------------------|----|-----|-----------|-----------------------------------------------------|--------------------|
| Barr, L. and Aug | Aug | Promoting positive and safe care in forensic mental health inpatient settings: Evaluating critical factors that assist nurses to reduce the use of restrictive practices | Determine how nurses' experiences can inform changes to reduce use of restrictive practices | NO | n/a | Australia | nurses in forensic mental health inpatient settings | physical restraint |
|------------------|-----|--------------------------------------------------------------------------------------------------------------------------------------------------------------------------|---------------------------------------------------------------------------------------------|----|-----|-----------|-----------------------------------------------------|--------------------|

|              |      |                                                                                                                                                  |                                                                                                 |     |           |         |                                       |                    |
|--------------|------|--------------------------------------------------------------------------------------------------------------------------------------------------|-------------------------------------------------------------------------------------------------|-----|-----------|---------|---------------------------------------|--------------------|
| Bower, F. L. | 2003 | A synthesis of what we know about the use of physical restraints and seclusion with patients in psychiatric and acute care settings: 2003 update | Describe what is known about seclusion and restraint of psych patients and acute inpatient care | YES | narrative | US      | psychiatric and acute care settings   | physical restraint |
| Bowers, L.   | 2014 | Safewards: a new model of conflict and containment on psychiatric wards                                                                          | Describing the Safewards model for addressing risk and coercion in inpatient wards              | NO  | narrative | England | psychiatric and mental health nursing | physical restraint |

|            |      |                                                                      |                                                                                                                                                                                                                                         |     |           |         |                                       |                    |
|------------|------|----------------------------------------------------------------------|-----------------------------------------------------------------------------------------------------------------------------------------------------------------------------------------------------------------------------------------|-----|-----------|---------|---------------------------------------|--------------------|
| Bowers, L. | 2014 | Safewards: the empirical basis of the model and a critical appraisal | Review and evaluate evidence for the Safewards model                                                                                                                                                                                    | YES | narrative | n/a     | psychiatric and mental health nursing | physical restraint |
| Bowers, L. | Feb  | Manual restraint and shows of force: the City-128 study              | to assess the relationship of manual restraint and show of force to conflict behaviours, the use of containment methods, service environment, physical environment, patient routines, staff characteristics, and staff group variables. | no  | n/a       | England | acute mental health care              | physical restraint |

|             |      |                                                                                                                                                          |                                                                                             |    |     |           |                       |                    |
|-------------|------|----------------------------------------------------------------------------------------------------------------------------------------------------------|---------------------------------------------------------------------------------------------|----|-----|-----------|-----------------------|--------------------|
| Brophy, L.  | 2016 | Consumers and Carer perspectives on poor practice and the use of seclusion and restraint in mental health settings: results from Australian focus groups | Present patient, carers, family member and support person perspectives related to restraint | NO | n/a | Australia | mental health setting | physical restraint |
| Chandler, C | 2012 | Reducing use of restraints and seclusion to create a culture of safety                                                                                   | Describe the structure that empowered staff to reduce the use of restraints                 | NO | n/a | US        | psychiatric inpatient | physical restraint |

|                 |                                                                                                            |                                                                                           |     |           |        |                       |                    |
|-----------------|------------------------------------------------------------------------------------------------------------|-------------------------------------------------------------------------------------------|-----|-----------|--------|-----------------------|--------------------|
| Curran, S. 2007 | Staff resistance to restraint reduction: identifying & overcoming barriers                                 | to explore literature on restance to reduction in reducing physical restraint             | yes | narrative | n/a    | psychiatir inpatient  | physical restraint |
| De Benedic 2011 | Staff perceptions and organizational factors as predictors of seclusion and restraint on psychiatric wards | Determine if staff perceptions related to violence on the ward predicted use of restraint | NO  | n/a       | Canada | psychiatric inpatient | physical restraint |



|             |      |                                                                                                                                                          |                                                                       |    |     |        |                                                                   |                    |
|-------------|------|----------------------------------------------------------------------------------------------------------------------------------------------------------|-----------------------------------------------------------------------|----|-----|--------|-------------------------------------------------------------------|--------------------|
| Delaney, K. | 2005 | Patient characteristics and setting variables related to use of restraint on four inpatient psychiatric units for youths                                 | Examine characteristics of children & adolescents who were restrained | NO | n/a | USA    | children and adolescents briefly hospitalized in a psych hospital | physical restraint |
| Gagnon, M.  | 2013 | Alternatives to seclusion and restraint in psychiatry and in long-term care facilities for the elderly: perspectives of service users and family members | Assessing alternatives to restraint for the elderly                   | NO | n/a | Canada | psychiatry service users and service user's families              | physical restraint |

|              |      |                                                                                                                                                                                                 |                                                                    |    |     |           |                                                               |                    |
|--------------|------|-------------------------------------------------------------------------------------------------------------------------------------------------------------------------------------------------|--------------------------------------------------------------------|----|-----|-----------|---------------------------------------------------------------|--------------------|
| Gerace, A. & | 2019 | Perceptions of nurses working with psychiatric consumers regarding the elimination of seclusion and restraint in psychiatric inpatient settings and emergency departments: An Australian survey | Nurses' perceptions on reducing & eliminating the use of restraint | NO | n/a | Australia | nurses working with psychiatric consumers                     | physical restraint |
| Hadi, F. and | 2015 | Predictors of physical restraint in a psychiatric emergency setting                                                                                                                             | Identify patients who are frequently restrained                    | NO | n/a | Iran      | patients admitted to a psych hospital during the study period | physical restraint |

|             |      |                                                                                                                                     |                                                                                                         |     |             |                         |                     |                    |
|-------------|------|-------------------------------------------------------------------------------------------------------------------------------------|---------------------------------------------------------------------------------------------------------|-----|-------------|-------------------------|---------------------|--------------------|
| Hammervo    | 2019 | Post-incident review after restraint in mental health care -a potential for knowledge development, recovery promotion and restraint | Explore the current knowledge of PIR to assess the extent to which it can minimize restraint use & harm | YES | Scoping     | Sweden, UK, Canada, USA | mental health care  | physical restraint |
| Hasan, A. A | 2019 | Psychiatric nurses' knowledge, attitudes, and practice towards the use of physical restraints                                       | Examine knowledge, attitudes and practice of psych nurses                                               | NO  | n/a         | Saudia Arabia           | psychiatric nursing | physical restraint |
| Hawsawi, T  | 2020 | Nurses' and consumers' shared experiences of seclusion and restraint: A qualitative literature review                               | to explore how nurses and consumers experienced seclusion and restraint events in mental health care.   | yes | qualitative | various                 | mental health care  | physical restraint |

|                 |      |                                                                                                                  |                                                                                                                                                                                                                                              |     |            |         |                                     |                    |
|-----------------|------|------------------------------------------------------------------------------------------------------------------|----------------------------------------------------------------------------------------------------------------------------------------------------------------------------------------------------------------------------------------------|-----|------------|---------|-------------------------------------|--------------------|
| Hopton, J.      | 1995 | Control and restraint in contemporary psychiatric nursing: some ethical considerations                           | an evaluation of the ethical justifications for and the ethical and political objections to the use of physical restraint techniques as a response to aggressive and self-injurious behaviour in contemporary mental health nursing practice | yes | narrative  | various | psychiatric nursing                 | physical restraint |
| Luiselli, J. K. | 2009 | Physical restraint of people with intellectual disability: a review of implementation                            | Describe procedures to reduce and eliminate the use of physical restraint                                                                                                                                                                    | YES | Literature | USA     | people with intellectual disability | physical restraint |
| Riahi, S. and   | 2016 | An integrative review exploring decision-making factors influencing mental health nurses in the use of restraint | To explore what influences mental health nurses' decision-making in the use of restraint.                                                                                                                                                    | yes | mixed      | various | mental health nursing               | physical restraint |
| Stewart, D.     | 2010 | A review of interventions to reduce mechanical restraint and seclusion among adult psychiatric inpatients        | To examine the nature and effectiveness of interventions to reduce use of mechanical restraint in adult psych patients inpatients                                                                                                            | YES | Literature | various | adult psychiatric inpatients        | physical restraint |

|              |      |                                                                                                                    |                                                                                                                                                                                                                                  |    |     |            |                      |                    |
|--------------|------|--------------------------------------------------------------------------------------------------------------------|----------------------------------------------------------------------------------------------------------------------------------------------------------------------------------------------------------------------------------|----|-----|------------|----------------------|--------------------|
| Taxis, J. C. | 2002 | Ethics and praxis:<br>alternative strategies to<br>physical restraint and<br>seclusion in a psychiatric<br>setting | highlights a 42-month project in<br>which a comprehensive program<br>revision was implemented in a<br>psychiatric hospital that included<br>numerous alternative strategies<br>to the use of patient restraint and<br>seclusion. | no | n/a | US (Texas) | psychiatric hospital | physical restraint |
|--------------|------|--------------------------------------------------------------------------------------------------------------------|----------------------------------------------------------------------------------------------------------------------------------------------------------------------------------------------------------------------------------|----|-----|------------|----------------------|--------------------|

| Theoretical perspective (i.e. constructivist, feminist) to undertake study | Study design (grounded theory/phenomenology/qualitative exploratory, etc) | Participant characteristics - staff/professionals (age, profession, ethnicity, etc) | Participant characteristics - patients/service-users (age, ethnicity, etc) | Data collection methods | Key findings/ Themes                                                                                                                 | Explicit theories used to interpret findings (includes reference/clearly defined) |
|----------------------------------------------------------------------------|---------------------------------------------------------------------------|-------------------------------------------------------------------------------------|----------------------------------------------------------------------------|-------------------------|--------------------------------------------------------------------------------------------------------------------------------------|-----------------------------------------------------------------------------------|
| not identified                                                             | review                                                                    | n/a                                                                                 | n/a                                                                        | n/a                     | The type of restraint used is reflective of the culture which the psych system exists; patients and staff view restraint differently | not identified                                                                    |

|                |                                                  |     |     |                          |                                                                                                                                                                                                                                                                                                                                                                                                                                                                                                                                                |                |
|----------------|--------------------------------------------------|-----|-----|--------------------------|------------------------------------------------------------------------------------------------------------------------------------------------------------------------------------------------------------------------------------------------------------------------------------------------------------------------------------------------------------------------------------------------------------------------------------------------------------------------------------------------------------------------------------------------|----------------|
| not identified | descriptive case study (secondary data analysis) | n/a | n/a | observation (case study) | Existing records indicated that over a 58-month follow-up period (January 2000 to October 2004), the larger crisis center took ten months until a month registered zero seclusions and 31 months until a month recorded zero restraints. The smaller crisis center achieved these same goals in two months and 15 months, respectively. The success of this initiative suggests that policy makers and organizational leaders familiarize themselves with these and other similar seclusion and restraint reduction strategies that now exist. | not identified |
| not identified | review                                           | n/a | n/a | n/a                      | Different levels of evidence indicate the benefit of staff training, shared decision-making interventions and integrated care interventions to reduce coercive treatment in mental health services. These different levels of evidence should be considered in the development of policy, clinical and implementation initiatives to reduce coercive practices in mental healthcare, and should lead to further studies in both high- and low-income countries to improve the strength and credibility of the evidence base.                   | not identified |

|                |                         |                                                                            |     |                            |                                                                                                                                                                                                                  |                |
|----------------|-------------------------|----------------------------------------------------------------------------|-----|----------------------------|------------------------------------------------------------------------------------------------------------------------------------------------------------------------------------------------------------------|----------------|
| not identified | qualitative exploratory | nurse qualifications, gender, age, employment status, years of experiences | n/a | semi-structured interviews | Exposure to aggression can increase the use of restriction, most nurses gained expertise in the specialty via experience vs formalized education, leadership & training for less experienced staff is beneficial | not identified |
|----------------|-------------------------|----------------------------------------------------------------------------|-----|----------------------------|------------------------------------------------------------------------------------------------------------------------------------------------------------------------------------------------------------------|----------------|



|                |                                                     |     |     |     |                                                                                                                                                                                                                                                                                                                                                                                                                                                                                                                                                                                                                                                                      |                |
|----------------|-----------------------------------------------------|-----|-----|-----|----------------------------------------------------------------------------------------------------------------------------------------------------------------------------------------------------------------------------------------------------------------------------------------------------------------------------------------------------------------------------------------------------------------------------------------------------------------------------------------------------------------------------------------------------------------------------------------------------------------------------------------------------------------------|----------------|
| not identified | review                                              | n/a | n/a | n/a | The little that is known about restraint/seclusion use with these populations is inconsistent. Attitudes and perceptions of patients, family, and staff differ. However, all patients had very negative feelings about both, whether they were restrained/secluded or observed by others who were not restrained. The reasons for restraint/seclusion use vary with no accurate use rate for either. What precipitates the use of restraint/seclusion also varies, but professionals claim they are necessary to prevent/treat violent or unruly behavior. Some believe seclusion/restraint is effective, but there is no empirical evidence to support this belief. | not identified |
| not identified | evidence synthesis relating to model of containment | n/a | n/a | n/a | The Safewards Model is supported by the evidence, but that evidence is not particularly strong. There is a dearth of rigorous outcome studies and trials in this area, and an excess of descriptive studies. The model allows the generation of a number of different interventions in order to reduce rates of conflict and containment, and properly conducted trials are now needed to test its validity.                                                                                                                                                                                                                                                         | not identified |

|                |                               |     |                                                                                                                                                                                                                       |               |                                                                                                                                                                                                                                                                                                                                                                                                                                                                                                                                                                                                                                                                                                                                                       |                |
|----------------|-------------------------------|-----|-----------------------------------------------------------------------------------------------------------------------------------------------------------------------------------------------------------------------|---------------|-------------------------------------------------------------------------------------------------------------------------------------------------------------------------------------------------------------------------------------------------------------------------------------------------------------------------------------------------------------------------------------------------------------------------------------------------------------------------------------------------------------------------------------------------------------------------------------------------------------------------------------------------------------------------------------------------------------------------------------------------------|----------------|
| not identified | review                        | n/a | n/a                                                                                                                                                                                                                   | n/a           | identified six originating domains as sources of conflict and containment: the patient community, patient characteristics, the regulatory framework, the staff team, the physical environment, and outside hospital.                                                                                                                                                                                                                                                                                                                                                                                                                                                                                                                                  | not identified |
| not identified | cross sectional questionnaire | n/a | 136 acute mental health wards with their patients and staff in 67 hospitals in 26 National Health Service trusts (organizational units with common clinical policies and investment levels) in England, in 2004–2005. | questionnaire | Manual restraint was used less frequently on English acute psychiatric wards (0.20 incidents per day) than show of force (0.28 incidents per day). Both were strongly associated with the proportion of patients subject to legal detention, aggressive behaviours, and the enforcement of treatment and detention. Medical, nursing, and security guard staff provision were associated in different ways with variations in the use of these coercive interventions. An effective ward structure of rules and routines was associated with less dependence on these control methods. Training for manual restraint should incorporate the scenarios of attempted absconding and enforcement of treatment, as well as violent behaviour. Attempts to | not identified |

|                      |                         |     |                                                                                                                                                                                                                                                                                                                          |                            |                                                                                                                                          |                |
|----------------------|-------------------------|-----|--------------------------------------------------------------------------------------------------------------------------------------------------------------------------------------------------------------------------------------------------------------------------------------------------------------------------|----------------------------|------------------------------------------------------------------------------------------------------------------------------------------|----------------|
| not identified       | qualitative exploratory | n/a | The supporter focus groups consisted of 36 participants (29 women and seven men) who had experienced a family member or person close to them being secluded or restrained. These included parents, siblings, marital partners and two people who had advocacy roles. The consumer focus group consisted of 30 adults (13 | focus groups               | Patients view restraint as unnecessarily overused, restraint use creates & exacerbates problems for consumers, supporters, staff, system | Stigma (8)     |
| appreciative inquiry | qualitative case study  | n/a | Investigator's university and the study hospital approved the study                                                                                                                                                                                                                                                      | Inductive content analysis | Nurse expertise increased with access to opportunities, information, support & resources                                                 | not identified |

|                |                               |                                                                                                                                                                                                                    |     |               |                                                                                                                                                                                                                                                                                                                                                                                                                                                                         |                |
|----------------|-------------------------------|--------------------------------------------------------------------------------------------------------------------------------------------------------------------------------------------------------------------|-----|---------------|-------------------------------------------------------------------------------------------------------------------------------------------------------------------------------------------------------------------------------------------------------------------------------------------------------------------------------------------------------------------------------------------------------------------------------------------------------------------------|----------------|
| not identified | review                        | n/a                                                                                                                                                                                                                | n/a | n/a           | Professional organizations, regulating agencies, and hospital administrators have taken a strong stance on restraint reduction policies. When implementing a restraint reduction initiative, it is important to identify the barriers to restraint reduction, such as concern for personal safety, lack of knowledge about and practice using alternate de-escalation skills, and fear of disrupting the therapeutic milieu by using a variety of de-escalation methods | not identified |
| not identified | cross sectional questionnaire | 309 staff members (nurses, rehabilitation instructors, and nurse's aides) providing care to patients with serious mental disorders were recruited from eight university psychiatric hospitals and general-hospital | n/a | questionnaire | Use of restraint is higher in intensive care & emergency departments, and when staff perceives anger & aggression; SES did not predict use of restraint; staff education, title, and gender affect prevalence                                                                                                                                                                                                                                                           | not identified |

|                |                                          |     |                                                                                                                       |                                |                                                                                                                                                                                                                                                                                                                                                                                                                                                                                                                                         |                |
|----------------|------------------------------------------|-----|-----------------------------------------------------------------------------------------------------------------------|--------------------------------|-----------------------------------------------------------------------------------------------------------------------------------------------------------------------------------------------------------------------------------------------------------------------------------------------------------------------------------------------------------------------------------------------------------------------------------------------------------------------------------------------------------------------------------------|----------------|
| not identified | secondary data analysis (hospital cards) | n/a | n/a                                                                                                                   | examination of hospital charts | Youths who were at greatest risk of being restrained during brief inpatient treatment shared particular characteristics related to greater use of inpatient services, guardianship arrangements, special education placement, and history of suicide attempts. Inpatient staff members should remain particularly alert to the processing and regulation problems of these groups of patients.                                                                                                                                          | not identified |
| not identified | qualitative exploratory                  | n/a | 26 participants in short-term psychiatric care and 14 in long-term care facilities for the elderly and their families | Focus group discussions        | participants emphasized the importance of communicating with service users, as well as assessing their needs and their particular situation, for reducing the use of restraint and seclusion. A welcome and accompaniment of people admitted for short-term psychiatric care emerged also as key approaches to reduce the use of restraint and seclusion. Long-term care facilities could also reduce the need for restraint and seclusion by creating a stimulating home environment and individualized occupational therapy programs. | not identified |

|                |                        |                                   |                                                                                                                |                         |                                                                                                                                                                                                                       |                |
|----------------|------------------------|-----------------------------------|----------------------------------------------------------------------------------------------------------------|-------------------------|-----------------------------------------------------------------------------------------------------------------------------------------------------------------------------------------------------------------------|----------------|
| not identified | cross sectional survey | Nurses (n = 512) across Australia | n/a                                                                                                            | Anonymous survey        | Restraint viewed as a necessary last resort measure to maintain safety and did not agree that it should be eliminated from practice. They acknowledge that use is deleterious; use is a function of lack of resources | not identified |
| not identified | case control study     | n/a                               | files of 607 patients who were admitted during a one year period using convenience sampling; of these 486 were | Review of patient files | Patients admitted with meth induced psychotic disorder (MIP) & BPD I in manic episode had higher odds of being restrained; restraint is associated with longer stay; first admission more likely                      | not identified |

|                |                               |                                                                                                  |     |               |                                                                                                                                                                                                                                                                                                                                                                                                                                                                                                                                  |                |
|----------------|-------------------------------|--------------------------------------------------------------------------------------------------|-----|---------------|----------------------------------------------------------------------------------------------------------------------------------------------------------------------------------------------------------------------------------------------------------------------------------------------------------------------------------------------------------------------------------------------------------------------------------------------------------------------------------------------------------------------------------|----------------|
| not identified | review                        | n/a                                                                                              | n/a | n/a           | No significant outcome related to PIR alone; can be used to enhance professional and ethical practice regarding restraint                                                                                                                                                                                                                                                                                                                                                                                                        | not identified |
| not identified | cross sectional questionnaire | convenient purposive sample consisting of 110 nurses working in Al-Amal Mental Health Government | n/a | Questionnaire | Moderate knowledge and attitudes about restraint; less than half recognized alternatives and most did not understand the reasons for restraint                                                                                                                                                                                                                                                                                                                                                                                   | not identified |
| not identified | review                        | n/a                                                                                              | n/a | n/a           | six themes emerged under three main categories; shared experiences: disruption in care, disruption in the therapeutic relationship and shared negative impacts; nurses' experiences: Absence of less coercive alternatives; and consumers' experiences: overpowered, humiliated and punished. findings suggested that consumers should receive recovery-oriented, trauma-informed and consumer-centred care; while nurses should be better supported through personal, professional and organizational developmental strategies. | not identified |

|                |        |     |     |     |                                                                                                                                                                                                                                                                                                                                                                                                                                                                                                 |                                               |
|----------------|--------|-----|-----|-----|-------------------------------------------------------------------------------------------------------------------------------------------------------------------------------------------------------------------------------------------------------------------------------------------------------------------------------------------------------------------------------------------------------------------------------------------------------------------------------------------------|-----------------------------------------------|
| not identified | review | n/a | n/a | n/a | the number of situations where control and restraint techniques are used might be reduced by the development of new therapeutic approaches. Such approaches should allow for more negotiation regarding care between clients and nurses, and acknowledge the potential benefits of clients resisting supposedly therapeutic interventions which they find unhelpful                                                                                                                             | not identified                                |
| not identified | review | n/a | n/a | n/a | Antecedent interventions to eliminate behaviors causing restraint and fixed time release have the most (still meagre) research validation                                                                                                                                                                                                                                                                                                                                                       | motivating operations (Friman & Hawkins 2006) |
| not identified | review | n/a | n/a | n/a | Eight emerging themes were identified: 'safety for all', 'restraint as a necessary intervention', 'restraint as a last resort', 'role conflict', 'maintaining control', 'staff composition', 'knowledge and perception of patient behaviours', and 'psychological impact'. These themes highlight how mental health nurses' decision-making is influenced by ethical and safety                                                                                                                 | not identified                                |
| not identified | review | n/a | n/a | n/a | The interventions were diverse, but tended to include one or more of the following: new restraint and/or seclusion policies, staffing changes, staff training, review procedures and crisis management initiatives. The research was unable to address which of these elements was most effective. There was also evidence that some improved outcomes were achieved by substituting restraint or seclusion for each other or for alternatives forms of containment (medication in particular). | not identified                                |



|                |                        |     |     |                          |                                                                                                                                                                                                                                                                                                               |                |
|----------------|------------------------|-----|-----|--------------------------|---------------------------------------------------------------------------------------------------------------------------------------------------------------------------------------------------------------------------------------------------------------------------------------------------------------|----------------|
| not identified | descriptive case study | n/a | n/a | observation (case study) | The results of this project include a 94% reduction in the rate of restraint and seclusion, development of extensive staff and patient education programs, and comprehensive programmatic alterations consistent with a paradigm shift emphasizing collaboration, empowerment, and ethical clinical practice. | not identified |
|----------------|------------------------|-----|-----|--------------------------|---------------------------------------------------------------------------------------------------------------------------------------------------------------------------------------------------------------------------------------------------------------------------------------------------------------|----------------|

| <b>Theories/ideologies implicit by authors (but not references/explicity named)</b>                 | <b>Other interpretations used to explain the findings</b> |
|-----------------------------------------------------------------------------------------------------|-----------------------------------------------------------|
| Patient autonomy, Stigma, Cultural variation, Therapeutic communication, Staff attitude & knowledge | not identified                                            |

|                                                                                                                                                                                                                                                                                   |                                                                                                                                                                                                                                                                                  |
|-----------------------------------------------------------------------------------------------------------------------------------------------------------------------------------------------------------------------------------------------------------------------------------|----------------------------------------------------------------------------------------------------------------------------------------------------------------------------------------------------------------------------------------------------------------------------------|
| <p>patient safety, crisis mode of management, reacting in-stead of responding to each situation, which only added to the crisis levels. Staff members often overlooked the consumer's inherent strengths and re-sources because they were focusing primarily on the problems.</p> | <p>lower-volume facility was able to achieve and maintain the goal of zero restraint and seclusion long before the higher-volume facility because it was not as crowded as the other facility and because the layout and furnishings were more comfortable</p>                   |
| <p>Patient autonomy</p>                                                                                                                                                                                                                                                           | <p>The pre-existing mental health system will dictate whether results can be applied (i.e. countries where human rights abuses occur, non-formal settings such as spiritual healing). staff training, shared decision-making interventions and integrated care interventions</p> |

|                                                                                                                                                                                                                    |                |
|--------------------------------------------------------------------------------------------------------------------------------------------------------------------------------------------------------------------|----------------|
| occupational safety (Haines et al. 2017)-<br>Lack of post-graduate education (Koskinen et al, 2014)-- Limited cultural knowledge about indigenous peoples (Durey et al, 2014)-- Unit culture (Muir-Cochrane, 2018) | not identified |
|--------------------------------------------------------------------------------------------------------------------------------------------------------------------------------------------------------------------|----------------|

|                |                                                                                                                                                  |
|----------------|--------------------------------------------------------------------------------------------------------------------------------------------------|
| not identified | beliefs and attitudes of professionals that restraint is appropriate to protect patient                                                          |
| not identified | (1)staff team<br>(2)physical environment<br>(3)outside hospital<br>(4)patient community<br>(5)patient characteristics<br>(6)regulatory framework |

|                                                                                        |                                                                                                                                                                                                |
|----------------------------------------------------------------------------------------|------------------------------------------------------------------------------------------------------------------------------------------------------------------------------------------------|
| not identified                                                                         | the patient community, patient characteristics, the regulatory framework, the staff team, the                                                                                                  |
| patient safety, staff culture - less patient-centred, lack of training in alternatives | to enforce detention and treatment as it isto control aggression, medication refusal, coerced intramuscular medication, and attempted absconding, as well as with aggressive patient behaviour |
