# Supplementary material for: Theories for interventions to reduce physical and verbal abuse: A mixed methods review of the health and social care literature to inform future maternity care
Source: PubMed Central journal article supplement (PMC10124898; doi:10.1371/journal.pgph.0001594), 2023-04-24
Supplement: pgph.0001594.s004.pdf [file pgph.0001594.s004.pdf]

| ID  | Authors                                                                                                                  | Year of pub | Title                                                                                                                                                      | Journal                                                  | Vol | Issue | Pages   | Name & details of intervention                                                                                                                                      | Name & details of comparator | Intervention based on theory (Yes/No/ Unsure) | Country | Study context - maternity care, elderly population, physical                  | Type of Mistreatment (physical, verbal, physical restraint) | Study design (RCT, non-randomised trial, Before & After etc) | Year when data was collected |
|-----|--------------------------------------------------------------------------------------------------------------------------|-------------|------------------------------------------------------------------------------------------------------------------------------------------------------------|----------------------------------------------------------|-----|-------|---------|---------------------------------------------------------------------------------------------------------------------------------------------------------------------|------------------------------|-----------------------------------------------|---------|-------------------------------------------------------------------------------|-------------------------------------------------------------|--------------------------------------------------------------|------------------------------|
| 156 | Abraham, J. , Kupfer, R. , Behncke, A. , Berger-Hoger, B. , Icks, A. , Haastert, B. , Meyer, G. , Kopke, S. , Mohler, R. | 2019        | Implementation of a multicomponent intervention to prevent physical restraints in nursing homes (IMPRINT): A pragmatic cluster randomized controlled trial | International Journal of Nursing Studies                 | 96  |       | 27-34   | two versions of a guideline and theory-based multicomponent intervention (1. updated version of guidelines; 2. concise version of guidelines 3. control usual care) | Optimized usual care         | Yes                                           | Germany | nursing homes                                                                 | Physical                                                    | cluster RCT                                                  | 2015                         |
| 157 | Ahmadi, M. , Bagheri-Saweh, M. I. , Nouri, B. Mohamad amini, O. , Valiee, S.                                             | 2019        | Effect of Interventional Educational Programs on Intensive Care Nurses' Perception.                                                                        | Critical Care Nursing Quarterly                          | 42  | 1     | 106-116 | 2 day educational program for nurses about different types of restraint and issues related to its use                                                               | Before intervention          | no                                            | Iran    | ICU                                                                           | Physical                                                    | Before & After                                               | N/A                          |
| 158 | ersen, C. , Kolmos, A. , ersen, K. , Sippel, V. , Stenager, E.                                                           | 2017        | Applying sensory modulation to mental health inpatient care to                                                                                             | Nordic Journal of Psychiatry                             | 71  | 7     | 525-528 | Sensory Modulation (de-escalation method to prevent restraint &                                                                                                     | usual care                   | Yes                                           | Denmark | 2 inpatient psychiatric mental health care (intervention); 1 unite as control | Combined                                                    | non-randomised control trial                                 | 2014-2015                    |
| 159 | Barton, S. A. , Johnson, M. R. , Price, L. V.                                                                            | Jan         | Achieving restraint-free on an inpatient behavioral health unit                                                                                            | Journal of Psychosocial Nursing & Mental Health Services | 47  | 1     | 34-40   | Patient centered restraint-free program: staff training, development of a preventative comfort room for patients, changes in staff attitude                         | Before intervention          | Yes                                           | NR      | behavioural health inpatient unit                                             | Combined                                                    | Before & After                                               | 2001-2008                    |

|     |                                                                                                                                         |      |                                                                                                                                       |                                       |    |   |        |                                                                                                                                                                                                                                     |                     |     |                |                         |                                   |                |            |
|-----|-----------------------------------------------------------------------------------------------------------------------------------------|------|---------------------------------------------------------------------------------------------------------------------------------------|---------------------------------------|----|---|--------|-------------------------------------------------------------------------------------------------------------------------------------------------------------------------------------------------------------------------------------|---------------------|-----|----------------|-------------------------|-----------------------------------|----------------|------------|
| 160 | Beaulieu, C. ,<br>Wertheimer , J. C. ,<br>Pickett, L. ,<br>Spierre, L. ,<br>Schnorbus, T. ,<br>Healy, W. ,<br>Palmer, C. ,<br>Jones, A. | 2008 | Behavior management on an acute brain injury unit: evaluating the effectiveness of an interdisciplinary training program              | Journal of Head Trauma Rehabilitation | 23 | 5 | 304-11 | Nonviolent Crisis Intervention (NCI) program from the Crisis Prevention Institute; 4 day training in philosophy, prevention and safe management of disruptive behavior for instructors who go back to train staff in their facility | Before intervention | no  | USA            | acute barin injury unit | restraint use medication delivery | Before & After | 2006-2007  |
| 161 | Bell, A. ,<br>Gallacher, N.                                                                                                             | 2016 | Succeeding in Sustained Reduction in the use of Restraint using the Improvement Model                                                 | BMJ Quality Improvement Reports       | 5  | 1 |        | PDSA: Changes to reporting tool, staff debrief, education program, promote use of seated restraint                                                                                                                                  | Before intervention | Yes | Fife, scotland | acute admission wards   | Combined                          | Before & After | 2012, 2014 |
| 162 | Black, V. ,<br>Bobier, C. ,<br>Thomas, B. ,<br>Prest, F. ,<br>Ansley, C. ,<br>Loomes, B. ,<br>Eggleston, G. ,<br>Mountford, H.          | May  | Reducing seclusion and restraint in a child and adolescent inpatient area: implementation of a collaborative problem-solving approach | Australasian Psychiatry               |    |   | 1E+15  | Collaborative problem solving (CPS) approach: familiarize staff, online staff training, prompt cards and posters, maintenance (training of new staff)                                                                               | Before intervention | no  | NZ             | inpatient unit          | Combined                          | Before & After | 2016-2018  |

|     |                                                                                                                                                                        |            |                                                                                                            |                                                |    |   |        |                                                                                                                                                                                                                                           |                                                                                    |     |     |                         |          |                |           |
|-----|------------------------------------------------------------------------------------------------------------------------------------------------------------------------|------------|------------------------------------------------------------------------------------------------------------|------------------------------------------------|----|---|--------|-------------------------------------------------------------------------------------------------------------------------------------------------------------------------------------------------------------------------------------------|------------------------------------------------------------------------------------|-----|-----|-------------------------|----------|----------------|-----------|
| 163 | Blair, E. W. , Woolley, S. , Szarek, B. L. , Mucha, T. F. , Dutka, O. , Schwartz, H. I. , Wisniowski, J. , Goethe, J. W.                                               | 3          | Reduction of Seclusion and Restraint in an Inpatient Psychiatric Setting: A Pilot Study                    | Psychiatric Quarterly                          | 88 | 1 | 01-Jul | Intervention program: Broset Violence Checklist (BVC), staff education, frequent physician assessment of seclusion/resistant (S/R), formal review of S/R events, environmental enhancements                                               | Before intervention                                                                | no  | USA | psychiatric service     | Combined | Before & After | 2010-2012 |
| 164 | Borckardt, J. J. , Madan, A. , Grubaugh, A. L. , Danielson, C. K. , Pelic, C. G. , Hardesty, S. J. , Hanson, R. , Herbert, J. , Cooney, H. , Benson, A. , Frueh, B. C. | May        | Systematic investigation of initiatives to reduce seclusion and restraint in a state psychiatric hospital  | Psychiatric Services                           | 62 | 5 | 477-83 | Engagement model with 4 components: trauma informed care training, changes in rules and language, patient involvement in treatment planning, and changes to the physical characteristics of the therapeutic environment. (3 month period) | Each unit served as its own control from intervention to intervention (usual care) | Yes | USA | psychiatric hospital    | Combined | RCT            | 2005-2008 |
| 165 | Bowers, L. , Brennan, G. , Flood, C. , Lipang, M. , Oladapo, P.                                                                                                        | 2006 (Apr) | Preliminary outcomes of a trial to reduce conflict and containment on acute psychiatric wards: City Nurses | Journal of Psychiatric & Mental Health Nursing | 13 | 2 | 165-72 | Two 'City Nurses' were employed to work                                                                                                                                                                                                   | Before intervention                                                                | no  | UK  | acute psychiatric wards | Combined | Before & After |           |

|     |                                                                                                |      |                                                                                                                                                                   |                                  |    |   |         |                                                                                                                                                                                                                                                   |                     |    |     |                        |          |                |           |
|-----|------------------------------------------------------------------------------------------------|------|-------------------------------------------------------------------------------------------------------------------------------------------------------------------|----------------------------------|----|---|---------|---------------------------------------------------------------------------------------------------------------------------------------------------------------------------------------------------------------------------------------------------|---------------------|----|-----|------------------------|----------|----------------|-----------|
| 166 | Crosby, K. A. , Cigales, M. , Dunlap, G. , Neff, B. , Clark, H. B. , Giddings, T. , Blanco, A. | 2008 | Using staff training to decrease the use of restrictive procedures at two facilities for foster care children                                                     | Research on Social Work Practice | 18 | 5 | 401-409 | with two acute wards for 1 year, assisting with the implementation of changes according to                                                                                                                                                        | Before intervention | no | USA | foster care facilities | Physical | Before & After | N/A       |
| 167 | Dike, C. C. , Lamb-Pagone, J. , Howe, D. , Beavers, P. , Bugella, B. A. , Hillbr, M.           | 2020 | Implementing a program to reduce restraint and seclusion utilization in a public-sector hospital: Clinical innovations, preliminary findings, and lessons learned | Psychological Services           | 17 |   | 17      | Eleven clinical innovations based on 6 principles: (1) Leadership (2) Workforce development (3) Use of Restraint/Seclusion Prevention Tools (4) Data Informed Practice (5) Consumer Roles (6) Debriefing                                          | Before intervention | no | USA | Psychiatric            | Physical | Before & After | 2009-2012 |
| 168 | Donat, D. C.                                                                                   | 2003 | An analysis of successful efforts to reduce the use of seclusion and restraint at a public psychiatric hospital                                                   | Psychiatric Services             | 54 | 8 | 1119-23 | Multiple efforts to reduce restraint: change criteria in administrative review of incidents, changes in case review committee composition, development of behavioral consultation team, enhance assessment standards, improve staff-patient ratio | Before intervention | no | USA | Psychiatric            | Physical | Before & After | 1997-2002 |

|     |                                                                               |      |                                                                                                                                                 |                                            |    |    |         |                                                                                                                                                                       |                     |        |        |             |          |                |           |
|-----|-------------------------------------------------------------------------------|------|-------------------------------------------------------------------------------------------------------------------------------------------------|--------------------------------------------|----|----|---------|-----------------------------------------------------------------------------------------------------------------------------------------------------------------------|---------------------|--------|--------|-------------|----------|----------------|-----------|
| 169 | Duxbury, J. , Baker, J. , Downe, S. , Jones, F. , Greenwood, P. et al.        | 2019 | Minimising the use of physical restraint in acute mental health services: the outcome of a restraint reduction programme ('RESTRRAIN YOURSELF') | International journal of nursing studies   | 95 |    | 40â€8  | REsTRAIN YOURSELF intervention: (UK) modified version of 'Six Core Strategies' (US) multimodal approach to reduce restraint - prevention & trauma informed principles | usual care          | Yes    | UK     | Psychiatric | Physical | Non-random CT  | 2015-2016 |
| 170 | Godfrey, J. L. , McGill, A. C. , Jones, N. T. , Oxley, S. L. , Carr, R. M.    | 2014 | Anatomy of a transformation: a systematic effort to reduce mechanical restraints at a state psychiatric hospital                                | Psychiatric Services                       | 65 | 10 | 1277-80 | 2 strategies: (1) staff training in deescalation techniques (2) policy change for the use of mechanical restraint                                                     | Before intervention | no     | USA    | Psychiatric | Physical | Before & After | 2009-2012 |
| 171 | Goulet, M. H. , Larue, C. , Lemieux, A. J.                                    | 2018 | A pilot study of "post-seclusion and/or restraint review" intervention with patients and staff in a mental health setting                       | Perspectives in Psychiatric Care           | 54 | 2  | 212-220 | Staff training: 2 presentations (15-30 min) followed by 1 month period to implement the process via answering questions daily                                         | Before intervention | Yes    | Canada | Psychiatric | Physical | Before & After | 2014      |
| 172 | Holstead, Jenell , Lamond, Diane , Dalton, Jim , Horne, Anita , Crick, Robert | 2010 | Restraint Reduction in Children's Residential Facilities: Implementation at Damar Services                                                      | Residential Treatment for Children & Youth | 27 | 1  | Jan-13  | Multicomponent program consisting of employee training and resource management team                                                                                   | Before program      | Unsure | USA    | Care home   | Physical | Before & After | 2004-2008 |

|     |                                                                                           |      |                                                                                                                                                |                                            |    |        |                                                                                                                                                                                      |                                                                                                                                                          |            |             |                            |           |                |           |     |
|-----|-------------------------------------------------------------------------------------------|------|------------------------------------------------------------------------------------------------------------------------------------------------|--------------------------------------------|----|--------|--------------------------------------------------------------------------------------------------------------------------------------------------------------------------------------|----------------------------------------------------------------------------------------------------------------------------------------------------------|------------|-------------|----------------------------|-----------|----------------|-----------|-----|
| 173 | Huizing, A. R. , Hamers, J. P. , Gulpers, M. J. , Berger, M. P.                           | 2006 | Short-term effects of an educational intervention on physical restraint use: a cluster randomized trial                                        | BMC Geriatrics                             | 6  | 17     | An educational programme for nurses designed to promote restraint-free care and individualized care                                                                                  | usual care                                                                                                                                               | no         | Netherlands | Care home                  | Physical  | RCT (cluster)  | 2003-2004 |     |
| 174 | Huizing, A. R. , Hamers, J. P. , Gulpers, M. J. , Berger, M. P.                           | 2009 | A cluster-randomized trial of an educational intervention to reduce the use of physical restraints with psychogeriatric nursing home residents | Journal of the American Geriatrics Society | 57 | 7      | 1139-48                                                                                                                                                                              | An educational programme for selected staff to reduce restraint use; Five 2 hour educational sessions over 2 months plus a nurse specialist consultation | usual care | no          | Netherlands                | Care home | Physical       | RCT       | n/a |
| 175 | Huizing, A. R. , Hamers, J. P. , Gulpers, M. J. , Berger, M. P.                           | 2009 | Preventing the use of physical restraints on residents newly admitted to psycho-geriatric nursing home wards: a cluster-randomized trial       | International Journal of Nursing Studies   | 46 | 4      | 459-69                                                                                                                                                                               | An educational programme for selected staff to reduce restraint use inclusive of a nurse specialist consultation                                         | usual care | no          | Netherlands                | Care home | Physical       | RCT       | n/a |
| 176 | Johnson, K. , Curry, V. , Steubing, A. , Diana, S. , McCray, A. , McFarren, A. , Domb, A. | 2016 | A non-pharmacologic approach to decrease restraint use                                                                                         | Intensive & Critical Care Nursing          | 34 | 12-Sep | power point review of non-pharmacological interventions and alternative devices with hands on demonstration with the devices were provided in the TICU on both day and evening shift | Pre-intervention                                                                                                                                         | no         | USA         | Trauma intensive care unit | Physical  | Before & After |           |     |

|     |                                                                                                                   |      |                                                                                                                                       |                                            |     |    |         |                                                                                                                                                                                                                           |                                                                                                                                                   |     |         |           |          |                |           |
|-----|-------------------------------------------------------------------------------------------------------------------|------|---------------------------------------------------------------------------------------------------------------------------------------|--------------------------------------------|-----|----|---------|---------------------------------------------------------------------------------------------------------------------------------------------------------------------------------------------------------------------------|---------------------------------------------------------------------------------------------------------------------------------------------------|-----|---------|-----------|----------|----------------|-----------|
| 177 | Koczy, P. ,<br>Becker, C. ,<br>Rapp, K. ,<br>Klie, T. ,<br>Beische, D. ,<br>Buchele, G. ,<br>Kleiner, A.<br>et al | 2011 | Effectiveness of a multifactorial intervention to reduce physical restraints in nursing home residents                                | Journal of the American Geriatrics Society | 59  | 2  | 333-9   | 6 hour training course about restraint use to provide change agents with tools to minimize restraint use in situations of behavioral symptoms and injuries from falls                                                     | usual care                                                                                                                                        | no  | Germany | Care home | Physical | RCT            | 2004-2006 |
| 178 | Kopke, S. ,<br>Muhlhauser, I. ,<br>Gerlach, A. ,<br>Haut, A. ,<br>Haastert, B. ,<br>Mohler, R. ,<br>Meyer, G.     | 2012 | Effect of a guideline-based multicomponent intervention on use of physical restraints in nursing homes: a randomized controlled trial | JAMA                                       | 307 | 20 | 2177-84 | A multidisciplinary approach designed to address attitudes, subjective norms and perceived behavioral control; evidence-based guideline, information programs, endorsement of nursing home leaders, and support materials | Standard information about restraint use and methods to avoid physical restraints delivered in three 12 to 24 page previously developed brochures | Yes | Germany | Care home | Physical | RCT            | 2009-2010 |
| 179 | Lin, Y. L. ,<br>Liao, C. C. ,<br>Yu, W. P. ,<br>Chu, T. L. ,<br>Ho, L. H.                                         | 2018 | A Multidisciplinary Program Reduces Over 24 Hours of Physical Restraint in Neurological Intensive Care Unit                           | Journal of Nursing Research                | 26  | 4  | 288-296 | multidisciplinary PR reduction program                                                                                                                                                                                    | pre-intervention phasee                                                                                                                           | Yes | Taiwan  | ICU       | Physical | Before & After |           |

|     |                                                                     |      |                                                                                                                     |                                                  |    |   |        |                                                                                                                                                                                                                                                                                                 |                  |    |        |             |          |                |           |
|-----|---------------------------------------------------------------------|------|---------------------------------------------------------------------------------------------------------------------|--------------------------------------------------|----|---|--------|-------------------------------------------------------------------------------------------------------------------------------------------------------------------------------------------------------------------------------------------------------------------------------------------------|------------------|----|--------|-------------|----------|----------------|-----------|
| 180 | McCue, R. E. , Urcuyo, L. , Lili, Y. , Tobias, T. , Chambers, M. J. | 2004 | Reducing restraint use in a public psychiatric inpatient service                                                    | Journal of Behavioral Health Services & Research | 31 | 2 | 217-24 | 6 interventions primarily involving changing staff behavior: better identification of restraint, stress/anger management group for patients, staff training on crisis intervention, development of a crisis response team, daily review of all restraints and an incentive system for the staff | pre-intervention |    | USA    | Psychiatric | Physical | Before & After | 1999-2001 |
| 181 | Pellfolk, T. J. , Gustafson, Y. , Bucht, G. , Karlsson, S.          | Jan  | Effects of a restraint minimization program on staff knowledge, attitudes, and practice: a cluster randomized trial | Journal of the American Geriatrics Society       | 58 | 1 | 62-9   | A 6-month education program for nursing staff; one volunteer attended 2 days of seminars and the remainder watched six 30 minute video lectures with focus groups                                                                                                                               | usual care       | no | Sweden | Care home   | Physical | RCT            | n/a       |

|     |                                                                                                                                               |      |                                                                                                                              |                                                   |    |   |        |                                                                                                                                                                                                                                                                                                                         |                                      |        |         |             |          |                |      |
|-----|-----------------------------------------------------------------------------------------------------------------------------------------------|------|------------------------------------------------------------------------------------------------------------------------------|---------------------------------------------------|----|---|--------|-------------------------------------------------------------------------------------------------------------------------------------------------------------------------------------------------------------------------------------------------------------------------------------------------------------------------|--------------------------------------|--------|---------|-------------|----------|----------------|------|
| 182 | Putkonen, A. ,<br>Kuivalainen, S. ,<br>Louheranta, O. , Repo-Tiihonen, E. ,<br>Ryynanen, O. P. ,<br>Kautiainen, H. ,<br>Tiihonen, J.          | 2013 | Cluster-randomized controlled trial of reducing seclusion and restraint in secured care of men with schizophrenia            | Psychiatric Services                              | 64 | 9 | 850-5  | staff, patients, and doctors were trained for six months in applying six core strategies to prevent seclusion-restraint; six months of supervised intervention followed                                                                                                                                                 | Not reported                         | no     | Finland | Psychiatric | Physical | RCT            | 2009 |
| 183 | Schreiner, G. M. ,<br>Crafton, C. G. ,<br>Sevin, J. A.                                                                                        | 2004 | Decreasing the use of mechanical restraints and locked seclusion                                                             | Administration & Policy in Mental Health          | 31 | 6 | 449-63 | Multicomponent - Staff education and training; treatment interventions and system changes                                                                                                                                                                                                                               | Assessment phase before intervention | Unsure | USA     | Psychiatric | Physical | Before & After |      |
| 184 | Seckman, A. ,<br>Paun, O. ,<br>Heipp, B. ,<br>Van Stee, M. ,<br>Keels-Lowe, V. ,<br>Beel, F. ,<br>Spoon, C. ,<br>Fogg, L. ,<br>Delaney, K. R. | 2017 | Evaluation of the use of a sensory room on an adolescent inpatient unit and its impact on restraint and seclusion prevention | Journal of Child & Adolescent Psychiatric Nursing | 30 | 2 | 90-97  | Staff training encompassed the theory and principles of sensory, modulation guidelines to conducting a sensory room session, and hands-on familiarization with equipment. Training also included the steps to conducting a sensory room session and how to identify a patient who might be in need of the intervention. | pre-intervention                     | Yes    | USA     | Psychiatric | Physical | Before & After | 2015 |

|     |                                                                                              |      |                                                                                                                                                               |                                                          |    |   |                  |                                                                              |                       |        |                               |             |          |                |           |
|-----|----------------------------------------------------------------------------------------------|------|---------------------------------------------------------------------------------------------------------------------------------------------------------------|----------------------------------------------------------|----|---|------------------|------------------------------------------------------------------------------|-----------------------|--------|-------------------------------|-------------|----------|----------------|-----------|
| 185 | Singh, N. N. , Lancioni, G. E. , Karazsia, B.                                                | 2016 | Effectiveness of Caregiver Training in Mindfulness-                                                                                                           | Frontiers in Psychology                                  | 7  |   | 1549             | Mindfulness-Based Positive Behavior Support (MBPBS) for caregivers           | Training as usual     |        | NR (first author is from USA) | Care home   | Physical | RCT            |           |
| 186 | Singh, N. N. , Lancioni, G. E. , Karazsia, B. T. , Myers, R. E.                              | 2016 | Caregiver Training in Mindfulness-Based Positive Behavior Supports (MBPBS): Effects on Caregivers and Adults with Intellectual and Developmental Disabilities | Frontiers in Psychology                                  | 7  |   | 98               | 7-day intensive Mindfulness-Based Positive Behavior Support (MBPBS) training | pre-training          | Yes    | NR (first author is from USA) | Care home   | Physical | Before & After | NR        |
| 187 | Singh, N. N. , Lancioni, G. E. , Winton, A. S. W. , Singh, A. N. , Adkins, A. D. , Singh, J. | 2009 | Mindful staff can reduce the use of physical restraints when providing care to individuals with intellectual disabilities                                     | Journal of Applied Research in Intellectual Disabilities | 22 | 2 | 194-202          | 12 week mindfulness training programme                                       | pre-training          | Unsure | NR (first author is from USA) | Care home   | Physical | Before & After | NR        |
| 188 | Sivak, K.                                                                                    | 2012 | Implementation of comfort rooms to reduce seclusion, restraint use, and acting-out behaviors                                                                  | Journal of Psychosocial Nursing & Mental Health Services | 50 | 2 | 24-34            | Use of comfort rooms                                                         | Before implementation | Yes    | USA                           | Psychiatric | Physical | Before & After | 2010-2011 |
| 189 | Smith, N. H. , Timms, J. , Parker, V. G. , Reimels, E. M. , Hamlin, A.                       | 2003 | The impact of education on the use of physical restraints in the acute care setting                                                                           | Journal of Continuing Education in Nursing               | 34 | 1 | 26-33; quiz 46-7 | Comprehensive educational programme                                          | pre-training          | Yes    | USA                           | Acute       | Physical | Before & After | 2000      |

|     |                                                                                                                         |      |                                                                                                                                                                                                                                                |                                               |    |   |         |                                                                                                                    |              |     |        |                                             |          |                |           |
|-----|-------------------------------------------------------------------------------------------------------------------------|------|------------------------------------------------------------------------------------------------------------------------------------------------------------------------------------------------------------------------------------------------|-----------------------------------------------|----|---|---------|--------------------------------------------------------------------------------------------------------------------|--------------|-----|--------|---------------------------------------------|----------|----------------|-----------|
| 190 | Testad, I. ,<br>Aasl , , A.<br>M. , Aarsl ,<br>, D.                                                                     | 2005 | The effect of staff training on the use of restraint in dementia: a single-blind randomised controlled trial                                                                                                                                   | International Journal of Geriatric Psychiatry | 20 | 6 | 587-90  | intervention consisted of a full day seminar, followed by a one-hour session of guidance per month over six months | usual care   | Yes | Norway | Care home                                   | Physical | RCT            |           |
| 191 | Testad, I. ,<br>Mekki, T. E.<br>, Forl , , O. ,<br>Oye, C. ,<br>Tveit, E. M.<br>, Jacobsen,<br>F. ,<br>Kirkevold,<br>O. | 2016 | Modeling and evaluating evidence-based continuing education program in nursing home dementia care (MEDCED)– training of care home staff to reduce use of restraint in care home residents with dementia. A cluster randomized controlled trial | International Journal of Geriatric Psychiatry | 31 | 1 | 24-32   | 7 month training intervention "Trust Before Restraint"                                                             | usual care   | Yes | Norway | Care home                                   | Physical | RCT            | 2011-2013 |
| 192 | Van Loan,<br>Christopher L. , Gage,<br>Nicholas A.<br>, Cullen,<br>Joseph P.                                            | 2015 | Reducing Use of Physical Restraint: A Pilot Study Investigating a Relationship-Based Crisis Prevention Curriculum                                                                                                                              | Residential Treatment for Children & Youth    | 32 | 2 | 113-133 | Relationship based crisis prevention curriculum                                                                    | pre-training | Yes | USA    | <i>Residential treatment program (camp)</i> | Physical | Before & After | NR        |

|     |                                                                                              |            |                                                                                                            |                             |    |   |        |                                                                                                                          |              |     |        |             |          |                |           |
|-----|----------------------------------------------------------------------------------------------|------------|------------------------------------------------------------------------------------------------------------|-----------------------------|----|---|--------|--------------------------------------------------------------------------------------------------------------------------|--------------|-----|--------|-------------|----------|----------------|-----------|
| 193 | Wisdom, J. P. , Wenger, D. , Robertson, D. , Van Bramer, J. , Sederer, L. I.                 | 2015 (Aug) | The New York State Office of Mental Health Positive Alternatives to Restraint and Seclusion (PARS) Project | Psychiatric Services        | 66 | 8 | 851-6  | Training in, implementation of, and engagement with the Six Core Strategies to Reduce the Use of Seclusion and Restraint | pre-training | Yes | USA    | Psychiatric | Physical | Before & After | 2007-2011 |
| 194 | Yeh, S. H. , Hsiao, C. Y. , Ho, T. H. , Chiang, M. C. , Lin, L. W. , Hsu, C. Y. , Lin, S. Y. | Sep        | The effects of continuing education in restraint reduction on novice nurses in intensive care units        | Journal of Nursing Research | 12 | 3 | 246-56 | Four hour restraint reduction lecture                                                                                    | pre-training | Yes | Taiwan | ICU         | Physical | Before & After | NR        |

| Sample strategy (random, consecutive etc.) | Sample size                                                                                    | Participant characteristics - staff/professionals (age, profession, ethnicity, etc)  | Participant characteristics - patients/service-users (age, ethnicity, etc) | Data analysis methods                                                                                     | Included in Meta-Analysis | Evidence of effect of the intervention - Reduction in restraint                                                                                   | Intervention Point estimate                                                                                   | Intervention Standard deviation              | Intervention 95% CI - lower limit | Intervention 95% CI - upper limit | Intervention Nos of participants | Comp Point estimate                            | Comp Standard deviation                  | Comp 95% CI - lower limit | Comp 95% CI - upper limit | Comp Nos of participants |
|--------------------------------------------|------------------------------------------------------------------------------------------------|--------------------------------------------------------------------------------------|----------------------------------------------------------------------------|-----------------------------------------------------------------------------------------------------------|---------------------------|---------------------------------------------------------------------------------------------------------------------------------------------------|---------------------------------------------------------------------------------------------------------------|----------------------------------------------|-----------------------------------|-----------------------------------|----------------------------------|------------------------------------------------|------------------------------------------|---------------------------|---------------------------|--------------------------|
| Random                                     | 120 clusters                                                                                   |                                                                                      | Age, Gender                                                                | Randomised at cluster level; intervention at practitioner level; analysed an individual participant level | Yes                       | physical restraint prevalence on cluster level (2 interventions) - (Proportion of residents with at least one physical restraint after 12 months) | 1: -2.8<br>2: -3.9 (see comment in column AC for data for analysis - these are change scores not actual data) |                                              | 1: -5.5<br>2: -6.8                | 1: -0.01<br>2: -1.0               | 1: 2984;<br>2: 2550              | -1.2                                           |                                          | -0.04                     | 0.11                      | 3307                     |
|                                            | 30 nurses                                                                                      | Nurses working in ICU with atleast a bachelor's degree and 1 year of work experience | Non specific reason for hospitalization                                    |                                                                                                           | No                        | Mean score of nurses's (1) perception, (2)knowledge, (3)attitude, (4) practice of physical                                                        | (1)51.13;<br>(2)11.20;<br>(3)22.13;<br>(4)26.33                                                               | (1)11.81;<br>(2)1.58;<br>(3)5.51;<br>(4)2.17 |                                   |                                   |                                  | (1)72.43;<br>(2)7.06;<br>(3)28.23;<br>(4)21.20 | (1)11.54;<br>(2)1.85;(3)4.91;<br>(4)4.86 |                           |                           |                          |
| Cluster                                    | 2 Units with 17 beds; 25 staff members                                                         | Occupational therapists, nurses, social workers and medical staff                    | Men and women aged 18-64 with various psychiatric illnesses.               | Allocated at cluster level; intervention at practitioner                                                  | No                        | Rate of use of physical restraint (nos of events per bed day)                                                                                     | 0.0061                                                                                                        | NR                                           |                                   |                                   | 5371                             | 0.0106                                         | NR                                       |                           |                           | 4627                     |
|                                            | 26-bed behavioral health inpatient unit within a private, nonprofit 248-bed community hospital | N/A                                                                                  | N/A                                                                        |                                                                                                           | No                        | Number of patients restrained per fiscal year                                                                                                     | 0 [graph provided]                                                                                            |                                              |                                   |                                   |                                  | 4                                              |                                          |                           |                           |                          |

|  |                                                                                                                          |                                        |                                    |  |    |                                                    |                                                          |  |  |  |     |                                                              |  |  |  |    |
|--|--------------------------------------------------------------------------------------------------------------------------|----------------------------------------|------------------------------------|--|----|----------------------------------------------------|----------------------------------------------------------|--|--|--|-----|--------------------------------------------------------------|--|--|--|----|
|  | 84 staff;<br>222<br>patient<br>cases                                                                                     | Age; gender; profession;<br>experience | Brain injury<br>diagnosis; gender; |  | No | Percentage of<br>restraint use                     | 32<br>[estimated]<br>in graph                            |  |  |  | 148 | 36<br>(estimate<br>d from<br>graph)                          |  |  |  | 74 |
|  | 30 bed<br>Acute<br>Admission<br>ward                                                                                     | N/A                                    | N/A                                |  | No | Median acute<br>admissions<br>rate of<br>restraint | 1.97 [graph<br>provided]                                 |  |  |  |     | 4.18                                                         |  |  |  |    |
|  | 16 bed<br>unit; 16<br>full<br>restraint,<br>29 partial<br>restraint,<br>28 locked<br>doors, 6<br>seclusion<br>(baseline) | N/A                                    | children and<br>adolescents        |  | No | Restrictive<br>events                              | [full<br>restraint]<br>80; [partial<br>restraint]<br>226 |  |  |  |     | [full<br>restraint]<br>202;<br>[partial<br>restraint]<br>338 |  |  |  |    |

|        |                                                                        |     |                        |                                                    |     |                                                                                                                           |       |       |  |  |      |       |       |  |      |
|--------|------------------------------------------------------------------------|-----|------------------------|----------------------------------------------------|-----|---------------------------------------------------------------------------------------------------------------------------|-------|-------|--|--|------|-------|-------|--|------|
|        | 120 bed psychiatric service; 8029 patients compared to baseline n=3884 | N/A | Age; gender; ethnicity |                                                    | No  | Rate of seclusion events                                                                                                  | 213   |       |  |  | 8029 | 358   |       |  | 3884 |
| Random | 446 patients; 340 staff                                                |     |                        | allocated at unit level and analysed at unit level | No  | Mean seclusion and restraint rate (nos of seclusion or restraint incidents per patient day for each unit and each period) | 0.005 | 0.002 |  |  | 446  | 0.27  | 0.018 |  | 446  |
|        |                                                                        |     |                        |                                                    | Yes | restrained mean per shift                                                                                                 | 0.032 | 0.197 |  |  | 1315 | 0.039 | 0.211 |  | 284  |

|  |                              |                                                                                                                                                                                                                                                                          |                                                                                                                                                                    |  |    |                                                    |                |  |  |  |  |                |  |  |  |  |
|--|------------------------------|--------------------------------------------------------------------------------------------------------------------------------------------------------------------------------------------------------------------------------------------------------------------------|--------------------------------------------------------------------------------------------------------------------------------------------------------------------|--|----|----------------------------------------------------|----------------|--|--|--|--|----------------|--|--|--|--|
|  | 44 employees                 | 18 direct care staff, 1 supervisor; 13 female, 6 male (children's shelter); 9 direct care staff, 7 nurses, 3 therapists, 2 licensed nurse practitioners, 2 teachers, 1 occupational therapist, 1 psychologist; 19 female, 6 male (locked residential treatment facility) | foster children aged 18-18 years; boys and girls section(children's shelter); children aged 13-17, 60% foster children (locked residential treatment facility)     |  | No | Frequency of mechanically restrictive procedures   | refer to graph |  |  |  |  | refer to graph |  |  |  |  |
|  | 615 bed psychiatric hospital | N/A                                                                                                                                                                                                                                                                      | N/A                                                                                                                                                                |  | No | Mean annual restraint hours (per 100 patient days) | 570            |  |  |  |  | 5300           |  |  |  |  |
|  | unsure; multiple variables   | Direct care clinicians, clinical department heads, hospital director, psychopharmacologist                                                                                                                                                                               | Adult patients with severe and persistent psychiatric conditions (75% with schizophrenia/schizoaffective disorder); 2 thirds of patients have concurrent diagnosis |  | No | Seclusion and restraint hours per month            | 314            |  |  |  |  | 1344           |  |  |  |  |

|                |                                                               |                                                                                   |                                       |                                             |     |                                                                                       |              |              |      |      |                   |                 |                  |      |      |                   |
|----------------|---------------------------------------------------------------|-----------------------------------------------------------------------------------|---------------------------------------|---------------------------------------------|-----|---------------------------------------------------------------------------------------|--------------|--------------|------|------|-------------------|-----------------|------------------|------|------|-------------------|
| Paired Samples | 2 acute care wards from 14 adult mental health wards          |                                                                                   | Mixed gender and single sex wards.    | allocated and analysed at the cluster level | Yes | Restraint rate at adoption phase                                                      | 6.62         | 6.7040816    | 5.53 | 7.72 | 7 wards, 144 beds | 7.22            | 7.4540044        | 6.01 | 8.42 | 7 wards, 147 beds |
|                | 2910 acute adult unit patients; 334 community transition unit |                                                                                   | psychiatric patients; 18-64 years old |                                             | Yes | mechanical restraint use over 2 sites (daily incidence rate) - 2 sites a: AAU; b: CTU | a: 0.01, b:0 | a: 2.19, b:- |      |      | a: 1083; b:121    | a: 0.57, b:0.09 | a: 1.04, b: 0.45 |      |      | a: 577 ; b:95     |
|                | 12 staff; 195 patients                                        | 9 nurses, 3 orderlies; mean age= 41; average 16 years of experience in psychiatry |                                       |                                             | No  | Prevalence of restraint (% of patients)                                               | 7.5          |              |      |      |                   | 12.4            |                  |      |      |                   |
|                | 88 clients (2004); 125 clients (2008)                         |                                                                                   |                                       |                                             | No  | Restraints per child per year                                                         | 3.66         |              |      |      | 125               | 56              |                  |      |      | 88                |

|         |                                                               |                                                                                                                                  |                                                                                                                                                                      |                                                                       |     |                                            |          |       |  |  |    |       |       |  |  |    |
|---------|---------------------------------------------------------------|----------------------------------------------------------------------------------------------------------------------------------|----------------------------------------------------------------------------------------------------------------------------------------------------------------------|-----------------------------------------------------------------------|-----|--------------------------------------------|----------|-------|--|--|----|-------|-------|--|--|----|
| Random  | 5 nursing home wards; 167 residents selected, 145 at endline  | Nurses                                                                                                                           | Psycho-geriatric residents of both genders with dementia; average age 82.3 (control), 82.4 (experimental); 29% male, 71% female (control)                            |                                                                       | Yes | Mean restraint intensity post intervention | 1.57     | 1.751 |  |  | 72 | 1.89  | 1.723 |  |  | 54 |
| Cluster | 15 nursing home wards; 432 residents selected, 241 at endline | Nursing staff; RN's, care workers, care helpers, care assistants                                                                 | Psycho-geriatric residents of both genders; average age 83.4 (control), 82.0 (experimental); 20% male, 80% female (control); 22.2% male, 77.8% female (experimental) |                                                                       | Yes | Restraint intensity                        | In graph |       |  |  |    |       |       |  |  |    |
| Cluster | 14 nursing home wards; 138 residents selected, 105 at endline | Charge nurses, registered nurses, care workers, care helpers, care assistants, student care workers; average age 37, 80% women   | Psycho-geriatric residents; average age 82.5 (control), 80.1 (experimental); 30% male 60% female (control); 35.5% male 64.7% female (experimental)                   | cluster randomised, intervention for staff, assessed at patient level | No  | Restraint intensity post test 3            | 1.02     | 1.39  |  |  | 53 | 0.78  | 1.25  |  |  | 37 |
|         | 77 nurses                                                     | Nurses gender 16% (9) males; 84% (47) female. Age 20-30u 20% (10), 31-40y 41% (21), 41-50y 31% (16), 51-60y 3% (2), 61-70 3% (2) |                                                                                                                                                                      |                                                                       | Yes | Mean Restraints per 1000 patient days      | 237.8    | 56.4  |  |  |    | 314.1 | 35.4  |  |  |    |

|         |                                                                                                         |                                                                                 |                                                                                                                                                                                    |                                                                                          |     |                                                      |      |           |      |      |      |       |           |    |      |      |
|---------|---------------------------------------------------------------------------------------------------------|---------------------------------------------------------------------------------|------------------------------------------------------------------------------------------------------------------------------------------------------------------------------------|------------------------------------------------------------------------------------------|-----|------------------------------------------------------|------|-----------|------|------|------|-------|-----------|----|------|------|
| Cluster | 45 nursing homes; 430 restrained residents initially identified, 333 at endline                         | Registered nurses [40% with management roles], social workers                   | Severe cognitive impairment (median score 10/11 out of 16 on Dementia Screening Scale); 82.4% female, 17.6 % male (control), 71.2 % female, 28.8% (experimental); limited physical | cluster randomisation at nursing home level, intervention at staff level (change agents) | No  | Reduction of duration of restraint use 100% OR       | 2.16 |           | 1.05 | 4.46 |      |       |           |    |      |      |
| Cluster | 36 nursing homes (18 control, 18 intervention); 2166 residents (control), 2283 residents (intervention) | Fully trained nurses, nursing staff with 1 year training or on-the-job training | Average age 85 (control), 83 (experimental); 77% female* (control), 73% female (experimental) *no male value stated                                                                | cluster randomised at nursing home level,                                                | Yes | Prevalence of Physical Restraint Use at 6m follow up | 22.6 | 91.512509 | 18.5 | 26.8 | 1868 | 29.1  | 89.881315 | 25 | 33.3 | 1802 |
|         | 1291 patients                                                                                           |                                                                                 | 4 phases, Males: 521 (59.6%) 23 (57.5%), 101 (63.1%), and 135 (62.2%). Mean age for 4 phases; 54.5 (sd 20.5), 55.8 (sd 19.2), 53.5 (sd 21.1), and 56.4 (sd 21.4)                   |                                                                                          | Yes | Physical restraint hours at maintenance phase        | 58.3 | 103.8     |      |      | 135  | 178.9 | 446.5     |    |      | 521  |

|         |                                                                                                                                    |                                                                                                                                                                                                                                                                           |                                                                                                                                                                                                             |                                                                                                                                                               |     |                                             |      |      |      |      |      |      |      |  |  |      |
|---------|------------------------------------------------------------------------------------------------------------------------------------|---------------------------------------------------------------------------------------------------------------------------------------------------------------------------------------------------------------------------------------------------------------------------|-------------------------------------------------------------------------------------------------------------------------------------------------------------------------------------------------------------|---------------------------------------------------------------------------------------------------------------------------------------------------------------|-----|---------------------------------------------|------|------|------|------|------|------|------|--|--|------|
|         | 6517 patients                                                                                                                      |                                                                                                                                                                                                                                                                           | Pre-intervention; Median age 35.5, male 59.7% (3892), female 40.3% (2625). Post intervention median age 36.9, male 58.4%(2875), female 41.6% (1761)                                                         |                                                                                                                                                               | Yes | Number of restraints per 1000 patients days | 3.7  | 1.93 |      |      | 4236 | 7.99 | 2.69 |  |  | 6517 |
| Cluster | 162 staff and 162 residents (control), 184 staff 191 residents (intervention), at baseline; 133 staff and 165 residents (control), | Registered nurses, licensed practical nurses, and nursing aides; average age 41.8 (control), 43.5 (experimental); 90.7% female* (control), 89.7% female (experimental); 15.3 years in healthcare (control) 16.4 years in health care (experimental) *no male value stated | Group home residents with dementia; Average age 83.4 baseline, 84 baseline (control), 80.5 baseline, 81 baseline (experimental); 78.4% female* (control), 69.1% female (experimental) *no male value stated | cluster randomised at nursing unit level (20 to interv, 20 controls); intervention at the staff level (interv 184 staff; control 162 staff); outcomes patient | No  | Risk of being restrained at follow-up OR    | 0.35 |      | 0.15 | 0.83 |      |      |      |  |  |      |

|                                  |                                                        |               |                                                                                                                             |  |    |                                                                                         |       |           |      |     |    |       |           |      |      |    |
|----------------------------------|--------------------------------------------------------|---------------|-----------------------------------------------------------------------------------------------------------------------------|--|----|-----------------------------------------------------------------------------------------|-------|-----------|------|-----|----|-------|-----------|------|------|----|
| Stratified cluster randomisation | 2 intervention (50 beds) and 2 control wards (38 beds) |               | The mean & SD age of the patients was 40.2 & 10.6 in the intervention cluster and 38.4 & 10.6 years in the control cluster. |  | No | Difference in proportion of patient-days with seclusion, restraint, or room observation | 0.88  | 0.0721538 | 0.86 | 0.9 | 50 | 0.97  | 0.1258044 | 0.93 | 1.01 | 38 |
|                                  |                                                        |               |                                                                                                                             |  | No | Monthly average of full restraint events                                                | 21.43 |           |      |     |    | 37.67 |           |      |      |    |
|                                  | 52 staff                                               | none reported |                                                                                                                             |  | No | Restraint rate per 1000 patients days                                                   | 20.3  |           |      |     |    | 27.6  |           |      |      |    |

|        |                        |                                 |                                            |                                                                |     |                                                                                      |                 |      |  |  |    |                    |      |  |  |    |
|--------|------------------------|---------------------------------|--------------------------------------------|----------------------------------------------------------------|-----|--------------------------------------------------------------------------------------|-----------------|------|--|--|----|--------------------|------|--|--|----|
| Random | 77 caregivers          | Age;gender of caregivers        | Age; gender of patients                    |                                                                | Yes | Use of physical restraint post treatment                                             | 0.53            | 0.9  |  |  | 24 | 10.77              | 3.21 |  |  | 24 |
| NR     | Staff: 33, Patients:18 | Mean age 39, Male 17, female 16 | Mean age 26, male 12, Female 6             | Intervention to staff with outcomes at patient and staff level | Yes | Weekly frequency of staff use of physical restraints (over 40 weeks)                 | 2               | 2.53 |  |  | 18 | 14                 | 3.31 |  |  | 18 |
| NR     | Staff: 23, Patients:20 | Mean age 47, Male 13, female 10 | Mean age 26, Male 15, female 5             |                                                                | No  | Mean number of physical restraints per week by AM and PM shift (Baseline v Practice) | AM:0.2, PM:0.35 |      |  |  | 20 | AM: 2.67, PM: 2.60 |      |  |  | 20 |
| NR     | 70 clients             |                                 | 28 women; 42 men. Clients age ranged 18-79 |                                                                | No  | Average rate of restraint per 1000 days of client care                               | 0               |      |  |  |    | 0.39               |      |  |  |    |
| NR     | 397 patients           |                                 | NR                                         |                                                                | No  | Average no. of days restrained                                                       | 6.4             |      |  |  |    | 8.2                |      |  |  |    |

|         |                                                |                   |                         |                                  |    |                                                                       |      |  |  |  |    |      |  |  |  |    |
|---------|------------------------------------------------|-------------------|-------------------------|----------------------------------|----|-----------------------------------------------------------------------|------|--|--|--|----|------|--|--|--|----|
| random  | 55 in intervention group, 96 in control group  |                   | Age; gender of patients | Randomised at nursing home level | No | Use of restraints at follow-up score                                  | 1.5  |  |  |  | 55 | 3.7  |  |  |  | 87 |
| Cluster | 83 in intervention group, 114 in control group |                   | Age; gender of patients |                                  | No | Multivariate logistic regression of being subject to any restraint—OR | 2.48 |  |  |  |    |      |  |  |  |    |
| NR      | 60 staff                                       | Males, females 17 |                         |                                  | No | Average monthly frequency of restraint                                | 5.5  |  |  |  |    | 17.3 |  |  |  |    |

|    |           |                                   |                                                                                   |  |    |                                                                         |                 |      |  |  |    |                 |      |  |  |    |
|----|-----------|-----------------------------------|-----------------------------------------------------------------------------------|--|----|-------------------------------------------------------------------------|-----------------|------|--|--|----|-----------------|------|--|--|----|
| NR | NR        |                                   | Age; gender of children and youth served by PARS trained mental health facilities |  | No | Number of restraint and seclusions per 1000 client days at 3 facilities | 1:25, 2:7, 3:13 |      |  |  |    | 1:67, 2:63, 3:9 |      |  |  |    |
| NR | 37 nurses | All female nurses, mean age 25.65 |                                                                                   |  | No | Clinical practice of restraint use (attitudes towards not practice)     | 28.05           | 3.59 |  |  | 37 | 28.41           | 3.28 |  |  | 37 |
